# Supplementary material for: Alternating ethylene-norbornene copolymerization catalyzed by cationic organopalladium complexes bearing hemilabile bidentate ligands of α-amino-pyridines
Source: Royal Society of Chemistry journal article supplement (doi:10.1039/b912068h), 2009-01-01
Supplement: b912068h.pdf [file b912068h.pdf]

# Alternating Ethylene-Norbornene Co-polymerization Catalyzed by Cationic Organopalladium Complexes Bearing Hemi-labile Bidentate Ligands of $\alpha$ -Amino-Pyridines

Ya-Chi Lin, Kuo-Hsuan Yu, Shou-Ling Huang, Yi-Hung Liu, Yu Wang, Shih-Tzung Liu and Jwu-Ting  
Chen\*

Department of Chemistry, National Taiwan University, Taipei 106, Taiwan

## Supplementary

|                                                                                          |    |
|------------------------------------------------------------------------------------------|----|
| Experimental section                                                                     | 1  |
| Determination of norbornene content and alternating percentage for copolymers            | 22 |
| Determination of ethylene concentration                                                  | 22 |
| Fineman-Ross plot                                                                        | 23 |
| Correlation of $T_g$ and norbornene content determined from $^{13}\text{C}$ NMR data     | 24 |
| $^{13}\text{C}$ NMR spectra of ethylene and norbornene copolymer catalyzed by <b>3b'</b> | 27 |
| Kinetic data and spectra of variable temperature NMR                                     | 26 |
| X-ray crystal data and ORTEP drawings                                                    | 32 |
| 2D-NOSEY spectrum for <b>3b</b> in $\text{CDCl}_3$                                       | 39 |
| Comparative $^1\text{H}$ NMR spectrum of norbornene insertion into <b>3b'</b>            | 40 |
| References                                                                               | 41 |

## Experimental Section

### Synthesis and Characterization.

***N*-(pyridin-2-ylmethylene)-propan-2-amine** A 30 mL solution of dichloromethane that contained 2-pyridinecarboxaldehyde (2.40 mL, 25 mmol) and isopropylamine (2.20 mL, 25 mmol) was refluxed with the presence of catalytic amounts of sulfuric acid and 4Å activated molecular sieves for 24 h. The reaction mixture was first filtrated, and the solvent was removed in *vacuo*. The product was collected as a yellow liquid by distillation. (2.58 g, 70%). <sup>1</sup>H NMR (300 MHz, CDCl<sub>3</sub>): δ 8.56 (d, *J*<sub>HH</sub> = 5.0 Hz, 1H, Py H-6), 8.32 (s, 1H, CH=N), 7.91 (d, *J*<sub>HH</sub> = 8.3 Hz, 1H, Py H-3), 7.64 (t, *J*<sub>HH</sub> = 7.6 Hz, 1H, Py H-4), 7.22 (t, *J*<sub>HH</sub> = 6.8 Hz, 1H, Py H-5), 3.56 (sept, *J*<sub>HH</sub> = 6.1 Hz, 1H, NCH(CH<sub>3</sub>)<sub>2</sub>), 1.21 (d, *J*<sub>HH</sub> = 5.9 Hz, 6H, NCH(CH<sub>3</sub>)<sub>2</sub>).

**<sup>1</sup>PrHNCH<sub>2</sub>(*o*-C<sub>6</sub>H<sub>5</sub>N) (L3a)** To a solution of (*N*-(pyridin-2-ylmethylene)-propan-2-amine (2.58 g, 17 mmol) in methanol (50 mL) was added excess NaBH<sub>4</sub> (1.00 g, 26 mmol). The reaction was stirred overnight at 25 °C, then quenched by water and extracted into dichloromethane. After solvent was removed under reduced pressure, the residue was distilled to give a yellow liquid product **L3a** in 74% yield (1.92 g). <sup>1</sup>H NMR (400 MHz, CDCl<sub>3</sub>): δ 8.47 (d, *J*<sub>H-H</sub> = 4.0 Hz, 1H, Py H-2), 7.55 (dt, *J*<sub>H-H</sub> = 2.0, 7.5 Hz, 1H, Py H-4), 7.20 (d, *J*<sub>H-H</sub> = 7.9 Hz, 1H, Py H-5), 7.07 (t, *J*<sub>H-H</sub> = 5.9 Hz, 1H, Py H-3), 3.82 (s, 2H, Py-CH<sub>2</sub>N), 2.79 (sept, *J*<sub>H-H</sub> = 6.1 Hz, 1H, NHCH(CH<sub>3</sub>)<sub>2</sub>), 1.04 (d, *J*<sub>H-H</sub> = 6.5 Hz, 6H, NCH(CH<sub>3</sub>)<sub>2</sub>). <sup>13</sup>C NMR (100.625 MHz, CDCl<sub>3</sub>): δ 159.98 (Py C-2), 149.28 (Py C-6), 136.42 (Py C-4), 122.40 (Py C-5), 121.87 (Py C-3), 52.96 (Py-CH<sub>2</sub>N), 48.46 (NCH(CH<sub>3</sub>)<sub>2</sub>), 22.94 (NCH(CH<sub>3</sub>)<sub>2</sub>).

**<sup>1</sup>BuHNCH<sub>2</sub>(*o*-C<sub>6</sub>H<sub>5</sub>N) (L4a)** The synthesis was carried out according to the same procedure as for **L3a**, using 2-pyridinecarboxaldehyde (2.40 mL, 25 mmol) and *tert*-butylamine (2.65 mL, 25 mmol) to give the product of condensation, 2-methyl-*N*-(pyridin-2-ylmethylene)propan-2-amine (2.87 g, 71%). <sup>1</sup>H NMR (300 MHz, CDCl<sub>3</sub>): δ 8.54 (d, *J*<sub>H-H</sub> = 3.7 Hz, 1H, Py H-6), 8.28 (s, 1H, CH=N), 7.94 (d, *J*<sub>H-H</sub> = 8.1 Hz, 1H, Py H-3), 7.63 (dt, *J*<sub>H-H</sub> = 1.4, 7.7 Hz, 1H, Py H-4), 7.20 (ddd, *J*<sub>H-H</sub> = 1.4, 5.3, 6.9 Hz, 1H, Py

H-5), 1.23 (s, 9H, NC(CH<sub>3</sub>)<sub>3</sub>).

The reductive reaction of 2-methyl-*N*-(pyridin-2-ylmethylene)propan-2-amine (2.87 g, 18 mmol) gave the product **L4a** in 75% yield (2.19 g). <sup>1</sup>H NMR (400 MHz, CDCl<sub>3</sub>): δ 8.53 (d, *J*<sub>H-H</sub> = 4.7 Hz, 1H, Py H-6), 7.62 (dt, *J*<sub>H-H</sub> = 1.8, 7.6 Hz, 1H, Py H-4), 7.32 (d, *J*<sub>H-H</sub> = 7.8 Hz, 1H, Py H-3), 7.13 (ddd, *J*<sub>H-H</sub> = 1.0, 4.9, 7.4 Hz, 1H, Py H-5), 3.88 (s, 2H, Py-CH<sub>2</sub>N), 1.20 (s, 9H, NC(CH<sub>3</sub>)<sub>3</sub>). <sup>13</sup>C NMR (100.625 MHz, CDCl<sub>3</sub>): δ 160.30 (Py C-2), 149.10 (Py C-6), 136.50 (Py C-4), 122.52 (Py C-5), 121.80 (Py C-3), 50.66 (NC(CH<sub>3</sub>)<sub>3</sub>), 48.47 (Py-CH<sub>2</sub>N), 29.02 (NC(CH<sub>3</sub>)<sub>3</sub>).

**PhHNCH<sub>2</sub>(*o*-C<sub>6</sub>H<sub>5</sub>N) (L5a)** A solution of 2-pyridinecarboxaldehyde (4.80 mL, 50 mmol), aniline (4.60 mL, 50 mmol), catalytic amount of sulfuric acid and activated molecular sieves 4Å in toluene (30 mL) were combined in round-bottom flask. A condensation reaction was carry out by azeotropic removal of water using Dean-Stark apparatus for 24 hr. Then the reaction mixture was filtrated, and the solvent was removed in *vacuo*. The crude product was distilled to give a yellow liquid as the product of condensation, *N*-(pyridin-2-ylmethylene)aniline (6.37 g, 70%). <sup>1</sup>H NMR (300 MHz, CDCl<sub>3</sub>): δ 8.70 (d, *J*<sub>H-H</sub> = 4.2 Hz, 1H, Py H-6), 8.59 (s, 1H, CH=N), 8.19 (d, *J*<sub>H-H</sub> = 7.8 Hz, 1H, Py H-3), 7.77 (dt, *J*<sub>H-H</sub> = 1.6, 7.8 Hz, 1H, Py H-4), 7.23~7.42 (m, 1H, Py H-5; m, 5H, Ar).

The successive reduction of *N*-(pyridin-2-ylmethylene)aniline (6.37 g, 35 mmol) gave a yellow liquid product **L5a** in 63% yield (5.76 g). <sup>1</sup>H NMR (400 MHz, CDCl<sub>3</sub>): δ 8.60 (dd, *J*<sub>H-H</sub> = 0.8, 4.9 Hz, 1H, Py H-6), 7.64 (dt, *J*<sub>H-H</sub> = 1.7, 7.7 Hz, 1H, Py H-4), 7.35 (d, *J*<sub>H-H</sub> = 7.8 Hz, 1H, Py H-3), 7.17~7.22 (m, 1H, Py H-5; 2H, m-Ar), 6.75 (dt, *J*<sub>H-H</sub> = 0.5, 7.4 Hz, 1H, p-Ar), 6.69 (d, *J*<sub>H-H</sub> = 8.3 Hz, 2H, o-Ar), 4.48 (s, 2H, Py-CH<sub>2</sub>N). <sup>13</sup>C NMR (100.625 MHz, CDCl<sub>3</sub>): δ 158.57 (Py C-2), 149.20 (Py C-6), 147.93 (ipso-Ar), 136.69 (Py C-4), 129.28 (o-Ar), 122.13 (Py C-5), 121.62 (Py C-3), 117.61 (p-Ar), 113.08 (m-Ar), 49.30 (Py-CH<sub>2</sub>N).

**(2,6-Me<sub>2</sub>C<sub>6</sub>H<sub>3</sub>)HNCH<sub>2</sub>(*o*-C<sub>6</sub>H<sub>5</sub>N) (L6a)** The synthesis was carried out according to the same

This journal is © The Royal Society of Chemistry 2009

procedure as for **L5a**, using 2-pyridinecarboxaldehyde (2.40 mL, 25 mmol) and 2,6-dimethylaniline (3.10 mL, 25 mmol) to give the product of condensation, 2,6-dimethyl-*N*-(pyridin-2-ylmethylene)aniline (3.58 g, 68%). <sup>1</sup>H NMR (200 MHz, CDCl<sub>3</sub>): δ 8.70 (d, *J*<sub>H-H</sub> = 5.0 Hz, 1H, Py H-6), 8.33 (s, 1H, CH=N), 8.23 (d, *J*<sub>H-H</sub> = 7.6 Hz, 1H, Py H-3), 7.83 (dt, *J*<sub>H-H</sub> = 1.5, 7.7 Hz, 1H, Py H-4), 7.38 (ddd, *J*<sub>H-H</sub> = 1.2, 4.9, 8.0 Hz, 1H, Py H-5), 6.90~7.15 (m, 5H, Ar), 2.17 (s, 6H, Ar-CH<sub>3</sub>).

The reductive reaction of 2,6-dimethyl-*N*-(pyridin-2-ylmethylene)aniline (3.58 g, 17 mmol) gave the product **L6a** in 81% yield (4.24 g). <sup>1</sup>H NMR (400 MHz, CDCl<sub>3</sub>): δ 8.63 (ddd, *J*<sub>H-H</sub> = 0.9, 1.6, 4.8 Hz, 1H, Py H-6), 7.65 (dt, *J*<sub>H-H</sub> = 1.8, 7.6 Hz, 1H, Py H-4), 7.27 (d, *J*<sub>H-H</sub> = 7.7 Hz, 1H, Py H-3), 7.20 (ddd, *J*<sub>H-H</sub> = 0.5, 5.0, 7.4 Hz, 1H, Py H-5), 7.02 (d, *J*<sub>H-H</sub> = 7.3 Hz, 2H, m-Ar), 6.85 (t, *J*<sub>H-H</sub> = 7.5 Hz, 1H, p-Ar), 4.31 (s, 2H, Py-CH<sub>2</sub>N), 2.35 (s, 6H, Ar-CH<sub>3</sub>). <sup>13</sup>C NMR (100.625 MHz, CDCl<sub>3</sub>): δ 159.12 (Py C-2), 149.24 (Py C-6), 146.12 (ipso-Ar), 136.50 (Py C-4), 129.53 (o-Ar), 128.83 (m-Ar), 122.14 (Py C-5), 122.03 (Py C-3), 121.91 (p-Ar), 53.66 (Py-CH<sub>2</sub>N), 18.69 (Ar-CH<sub>3</sub>).

**(2,6-<sup>i</sup>Pr<sub>2</sub>C<sub>6</sub>H<sub>3</sub>)HNCH<sub>2</sub>(*o*-C<sub>6</sub>H<sub>5</sub>N) (L7a)** The synthesis was carried out according to the same procedure as for **L5a**, using 2-pyridinecarboxaldehyde (2.40 mL, 25 mmol) and 2,6-diisopropylaniline (4.70 mL, 25 mmol) to give the product of condensation, 2,6-diisopropyl-*N*-(pyridin-2-ylmethylene)aniline (3.83 g, 58%). <sup>1</sup>H NMR (400 MHz, CDCl<sub>3</sub>): δ 8.75 (d, *J*<sub>H-H</sub> = 4.9 Hz, 1H, Py H-6), 8.35 (s, 1H, CH=N), 8.30 (d, *J*<sub>H-H</sub> = 7.9 Hz, 1H, Py H-3), 7.86 (t, *J*<sub>H-H</sub> = 7.7 Hz, 1H, Py H-4), 7.43 (dd, *J*<sub>H-H</sub> = 4.9, 7.4 Hz, 1H, Py H-5), 7.12~7.22 (m, 2H, m-Ar; 1H, p-Ar), 3.00 (sept, *J*<sub>H-H</sub> = 6.8 Hz, 2H, Ar-CH(CH<sub>3</sub>)<sub>2</sub>), 1.20 (d, *J*<sub>H-H</sub> = 6.9 Hz, 12H, Ar-CH(CH<sub>3</sub>)<sub>2</sub>). <sup>13</sup>C NMR (100.625 MHz, CDCl<sub>3</sub>): δ 162.99 (CH=N), 154.36 (Py C-2), 149.71 (Py-C-6), 148.40 (o-Ar), 137.27 (ipso-Ar), 136.82 (Py C-4), 123.10 (m-Ar), 125.38, 124.52, 121.38 (p-Ar, Py C-5 and Py C-3), 27.98, 27.95 (Ar-CH(CH<sub>3</sub>)<sub>2</sub>), 23.49 (Ar-CH(CH<sub>3</sub>)<sub>2</sub>).

The reductive reaction of 2,6-diisopropyl-*N*-(pyridin-2-ylmethylene)aniline (3.83 g, 14 mmol) gave

the product **L7a** in 76% yield (2.95 g).  $^1\text{H}$  NMR (400 MHz,  $\text{CDCl}_3$ ):  $\delta$  8.64 (d,  $J_{\text{H-H}} = 4.9$  Hz, 1H, Py H-6), 7.67 (dt,  $J_{\text{H-H}} = 1.7, 7.7$  Hz, 1H, Py H-4), 7.33 (d,  $J_{\text{H-H}} = 7.8$  Hz, 1H, Py H-3), 7.21 (dd,  $J_{\text{H-H}} = 5.2, 7.2$  Hz, 1H, Py H-5), 7.05~7.17 (m, 2H, m-Ar; 1H, p-Ar), 4.21 (s, 2H, Py- $\text{CH}_2\text{N}$ ), 3.38 (sept,  $J_{\text{H-H}} = 6.8$  Hz, 2H, Ar- $\text{CH}(\text{CH}_3)_2$ ), 1.26 (d,  $J_{\text{H-H}} = 6.7$  Hz, 12H, Ar- $\text{CH}(\text{CH}_3)_2$ ).  $^{13}\text{C}$  NMR (100.625,  $\text{CDCl}_3$ ):  $\delta$  159.03 (Py C-2), 149.34 (Py C-6), 143.07 (ipso-Ar), 142.72 (o-Ar), 136.50 (Py C-4), 123.91 (p-Ar), 123.59 (m-Ar), 122.16 (Py C-5), 122.04 (Py C-3), 56.81 (Py- $\text{CH}_2\text{N}$ ), 27.71 (Ar- $\text{CH}(\text{CH}_3)_2$ ), 24.28 (Ar- $\text{CH}(\text{CH}_3)_2$ ).

**$^1\text{PrHNMeH}(\text{o-C}_6\text{H}_5\text{N})$  (L3b)** The synthesis was carried out according to the same procedure as for **L3a**, using 2-acetylpyridine (2.80 mL, 25 mmol) and isopropylamine (2.14 mL, 25 mmol) to give the product of condensation, *N*-(1-(pyridin-2-yl)ethylidene)propan-2-amine (3.56 g, 90%).  $^1\text{H}$  NMR (400 MHz,  $\text{CDCl}_3$ ):  $\delta$  8.58 (ddd,  $J_{\text{H-H}} = 1.0, 1.8, 4.8$  Hz, 1H, Py H-6), 8.06 (dt,  $J_{\text{H-H}} = 1.1, 8.0$  Hz, 1H, Py H-3), 7.68 (dt,  $J_{\text{H-H}} = 1.8, 7.7$  Hz, 1H, Py H-4), 7.25 (ddd,  $J_{\text{H-H}} = 1.3, 4.9, 7.4$  Hz, 1H, Py H-5), 3.91 (sept,  $J_{\text{H-H}} = 6.3$  Hz, 1H,  $\text{NCH}(\text{CH}_3)_2$ ), 2.36 (s, 3H, Py- $\text{C}(\text{CH}_3)\text{N}$ ), 1.23 (d,  $J_{\text{H-H}} = 6.2$  Hz, 6H,  $\text{NCH}(\text{CH}_3)_2$ ).  $^{13}\text{C}$  NMR (100.625 MHz,  $\text{CDCl}_3$ ):  $\delta$  163.62 (Py- $\text{C}(\text{CH}_3)\text{N}$ ), 158.41 (Py C-2), 148.16 (Py C-6), 136.30 (Py C-4), 123.84 (Py C-5), 121.09 (Py C-3), 51.56 ( $\text{NCH}(\text{CH}_3)_2$ ), 23.42 ( $\text{NCH}(\text{CH}_3)_2$ ), 13.63 (Py- $\text{C}(\text{CH}_3)\text{N}$ ).

The reductive reaction of *N*-(1-(pyridin-2-yl)ethylidene)propan-2-amine (3.56 g, 22 mmol) gave the product **L3b** in 73% yield (2.62 g).  $^1\text{H}$  NMR (400 MHz,  $\text{CDCl}_3$ ):  $\delta$  8.54 (ddd,  $J_{\text{H-H}} = 0.9, 1.7, 4.8$  Hz, 1H, Py H-6), 7.61 (dt,  $J_{\text{H-H}} = 1.8, 7.6$  Hz, 1H, Py H-4), 7.26 (d,  $J_{\text{H-H}} = 8.0$  Hz, 1H, Py H-3), 7.12 (ddd,  $J_{\text{H-H}} = 1.2, 4.8, 7.5$  Hz, 1H, Py H-5), 3.96 (q,  $J_{\text{H-H}} = 6.7$  Hz, 1H, Py- $\text{CH}(\text{CH}_3)\text{N}$ ), 2.59 (sept,  $J_{\text{H-H}} = 6.2$  Hz, 1H,  $\text{NCH}(\text{CH}_3)_2$ ), 1.35 (d,  $J_{\text{H-H}} = 4.7$  Hz, 3H, Py- $\text{CH}(\text{CH}_3)\text{N}$ ), 1.04, 0.98 (d,  $J_{\text{H-H}} = 6.2, 6.3$  Hz, 6H,  $\text{NCH}(\text{CH}_3)_2$ ).  $^{13}\text{C}$  NMR (100.625 MHz,  $\text{CDCl}_3$ ):  $\delta$  165.01 (Py C-2), 149.29 (Py C-6), 136.33 (Py C-4), 121.72 (Py C-5), 121.28 (Py C-3), 56.19 (Py- $\text{CH}(\text{CH}_3)\text{N}$ ), 45.70 ( $\text{NCH}(\text{CH}_3)_2$ ), 23.24 (Py- $\text{CH}(\text{CH}_3)\text{N}$ ),

23.81, 22.25 (NCH(CH<sub>3</sub>)<sub>2</sub>).

**<sup>t</sup>BuHNMeH(*o*-C<sub>6</sub>H<sub>5</sub>N) (L4b)** The synthesis was carried out according to the same procedure as for **L3a**, using 2-acetylpyridine (5.60 mL, 50 mmol), *tert*-butylamine (5.30 mL, 50 mmol) to give the product **L4b** in 28% yield (2.5 g). <sup>1</sup>H NMR (400 MHz, CDCl<sub>3</sub>): δ 8.49 (d, *J*<sub>H-H</sub> = 4.0 Hz, 1H, Py H-6), 7.60 (dt, *J*<sub>H-H</sub> = 1.6, 7.5 Hz, 1H, Py H-4), 7.43 (d, *J*<sub>H-H</sub> = 7.9 Hz, 1H, Py H-3), 7.08 (dd, *J*<sub>H-H</sub> = 5.0, 7.2 Hz, 1H, Py H-5), 4.04 (q, *J*<sub>H-H</sub> = 6.8 Hz, 1H, Py-CH(CH<sub>3</sub>)N), 1.33 (d, *J*<sub>H-H</sub> = 6.8 Hz, 3H, Py-CH(CH<sub>3</sub>)N), 1.00 (s, 9H, NC(CH<sub>3</sub>)<sub>3</sub>). <sup>13</sup>C NMR (100.625 MHz, CDCl<sub>3</sub>): δ 167.69 (Py C-2), 148.67 (Py C-6), 136.30 (Py C-4), 121.36 (Py C-5), 121.03 (Py C-3), 53.75 (Py-CH(CH<sub>3</sub>)N), 51.21 (NC(CH<sub>3</sub>)<sub>3</sub>), 29.92 (NC(CH<sub>3</sub>)<sub>3</sub>), 26.00 (Py-CH(CH<sub>3</sub>)N).

**PhHNMeH(*o*-C<sub>6</sub>H<sub>5</sub>N) (L5b)** The synthesis was carried out according to the same procedure as for **L5a**, using 2-acetylpyridine (11.00 mL, 98 mmol) and aniline (9.00 mL, 100 mmol) to give the product of condensation, *N*-(1-(pyridin-2-yl)ethylidene)aniline (11.65 g, 60%). <sup>1</sup>H NMR (300 MHz, CDCl<sub>3</sub>): δ 8.66 (d, *J*<sub>H-H</sub> = 5.0 Hz, 1H, Py H-6), 8.24 (d, *J*<sub>H-H</sub> = 7.8 Hz, 1H, Py H-3), 7.77 (dt, *J*<sub>H-H</sub> = 1.3, 8.0 Hz, 1H, Py H-4), 7.33 (m, 1H, Py H-5), 7.10 (m, 2H, m-Ar), 6.82 (d, *J*<sub>H-H</sub> = 7.5 Hz, 2H, o-Ar), 6.66 (d, *J*<sub>H-H</sub> = 7.5 Hz, 1H, p-Ar), 2.33 (s, 3H, C(CH<sub>3</sub>)=N).

The reductive reaction of *N*-(1-(pyridin-2-yl)ethylidene)aniline (11.65 g, 59 mmol) gave the product **L5b** in 85% yield (9.92 g). <sup>1</sup>H NMR (400 MHz, CDCl<sub>3</sub>): δ 8.60 (td, *J*<sub>H-H</sub> = 0.8, 4.8 Hz, 1H, Py H-6), 7.61 (dt, *J*<sub>H-H</sub> = 1.8, 7.7 Hz, 1H, Py H-4), 7.36 (d, *J*<sub>H-H</sub> = 7.9 Hz, 1H, Py H-3), 7.00~7.20 (m, 1H, Py H-5; 2H, m-Ar), 6.68 (dt, *J*<sub>H-H</sub> = 0.6, 7.3 Hz, 1H, p-Ar), 6.59 (dd, *J*<sub>H-H</sub> = 0.6, 7.7 Hz, 1H, o-Ar), 4.65 (q, *J*<sub>H-H</sub> = 6.7 Hz, 1H, Py-CH(CH<sub>3</sub>)N), 4.49 (bs, 1H, NH-Ar), 1.57 (d, *J*<sub>H-H</sub> = 6.8 Hz, 3H, Py-CH(CH<sub>3</sub>)N). <sup>13</sup>C NMR (100.625 MHz, CDCl<sub>3</sub>): δ 163.92 (Py C-2), 149.31 (Py C-6), 147.14 (ipso-Ar), 136.83 (Py C-4), 129.18 (m-Ar), 121.98, 120.33, 117.41 (p-Ar, Py C-5 and Py C-3), 113.44 (o-Ar), 54.75 (Py-CH(CH<sub>3</sub>)N), 23.21 (Py-CH(CH<sub>3</sub>)N).

**(2,6-Me<sub>2</sub>C<sub>6</sub>H<sub>3</sub>)HNCMeH(*o*-C<sub>6</sub>H<sub>5</sub>N) (L6b)** The synthesis was carried out according to the same procedure as for **L5a**, using 2-acetylpyridine (2.80 mL, 25 mmol) and 2,6-dimethylaniline (3.10 mL, 25 mmol) to give the product of condensation, 2,6-dimethyl-*N*-(1-(pyridin-2-yl)ethylidene)aniline (3.27 g, 58%). <sup>1</sup>H NMR (200 MHz, CDCl<sub>3</sub>): δ 8.65 (d, *J*<sub>H-H</sub> = 4.0 Hz, 1H, Py H-6), 8.35 (d, *J*<sub>H-H</sub> = 8.0 Hz, 1H, Py H-3), 7.79 (dt, *J*<sub>H-H</sub> = 1.9, 7.8 Hz, 1H, Py H-4), 7.36 (ddd, *J*<sub>H-H</sub> = 1.2, 4.9, 7.2 Hz, 1H, Py H-5), 7.04 (d, *J*<sub>H-H</sub> = 7.2 Hz, 2H, *m*-Ar), 6.92 (t, *J*<sub>H-H</sub> = 6.4 Hz, 1H, *p*-Ar), 2.17 (s, 3H, C(CH<sub>3</sub>)=N), 2.02 (s, 6H, Ar-CH<sub>3</sub>).

The reductive reaction of 2,6-dimethyl-*N*-(1-(pyridin-2-yl)ethylidene)aniline (13.27 g, 15 mmol) gave the product **L6b** in 47% yield (1.59 g). <sup>1</sup>H NMR (400 MHz, CDCl<sub>3</sub>): δ 8.62 (ddd, *J*<sub>H-H</sub> = 0.9, 1.7, 4.8 Hz, 1H, Py H-6), 7.56 (dt, *J*<sub>H-H</sub> = 1.8, 7.6 Hz, 1H, Py H-4), 7.16 (ddd, *J*<sub>H-H</sub> = 1.2, 4.8, 7.5 Hz, 1H, Py H-5), 7.10 (dt, *J*<sub>H-H</sub> = 1.0, 7.7 Hz, 1H, Py H-3), 6.95 (d, *J*<sub>H-H</sub> = 7.4 Hz, 2H, *m*-Ar), 6.78 (t, *J*<sub>H-H</sub> = 7.4 Hz, 1H, *p*-Ar), 4.43 (q, *J*<sub>H-H</sub> = 6.7 Hz, 1H, Py-CH(CH<sub>3</sub>)N), 2.25 (s, 6H, Ar-CH<sub>3</sub>), 1.49 (d, *J*<sub>H-H</sub> = 6.7 Hz, 3H, Py-CH(CH<sub>3</sub>)N). <sup>13</sup>C NMR (100.625 MHz, CDCl<sub>3</sub>): δ 163.66 (Py C-2), 149.43 (Py C-6), 144.94 (ipso-Ar), 136.39 (Py C-4), 129.28 (*o*-Ar), 128.76 (*m*-Ar), 122.09, 121.46, 121.37 (*p*-Ar, Py C-5 and Py C-3), 57.92 (Py-CH(CH<sub>3</sub>)N), 22.58 (Py-CH(CH<sub>3</sub>)N), 18.97 (Ar-CH<sub>3</sub>).

**(2,6-<sup>i</sup>Pr<sub>2</sub>C<sub>6</sub>H<sub>3</sub>)HNCMeH(*o*-C<sub>6</sub>H<sub>5</sub>N) (L7b)** The synthesis was carried out according to the same procedure as for **L5a**, using 2-acetylpyridine (2.80 mL, 25 mmol) and 2,6-diisopropylaniline (4.70 mL, 25 mmol) to give the product of condensation, 2,6-diisopropyl-*N*-(1-(pyridin-2-yl)ethylidene)aniline (1.05 g, 15%). <sup>1</sup>H NMR (400 MHz, CDCl<sub>3</sub>): δ 8.70 (d, *J*<sub>H-H</sub> = 7.9 Hz, 1H, Py H-6), 8.38 (d, *J*<sub>H-H</sub> = 8.0 Hz, 1H, Py H-3), 7.83 (dt, *J*<sub>H-H</sub> = 1.7, 7.6 Hz, 1H, Py H-4), 7.40 (ddd, *J*<sub>H-H</sub> = 1.1, 4.9, 7.4 Hz, 1H, Py H-5), 7.00~7.20 (m, 2H, *m*-Ar; 1H, *p*-Ar), 2.76 (sept, *J*<sub>H-H</sub> = 6.9 Hz, 2H, Ar-CH(CH<sub>3</sub>)<sub>2</sub>), 2.23 (s, 3H, Py-C(CH<sub>3</sub>)N), 1.16 (d, 12H, *J*<sub>H-H</sub> = 6.9 Hz, Ar-CH(CH<sub>3</sub>)<sub>2</sub>). <sup>13</sup>C NMR (100.625 MHz, CDCl<sub>3</sub>): δ 166.99 (Py-C(CH<sub>3</sub>)N), 156.47 (Py C-2), 1498.59 (Py C-6), 146.40 (*o*-Ar), 136.51 (Py C-4), 135.81 (ipso-Ar), 123.00 (*m*-Ar), 124.81, 123.60, 121.34 (*p*-Ar, Py C-5 and Py C-3), 28.26 (Ar-CH(CH<sub>3</sub>)<sub>2</sub>), 22.91, 23.23

(Ar-CH(CH<sub>3</sub>)<sub>2</sub>), 17.34 (Py-C(CH<sub>3</sub>)N).

The reductive reaction of 2,6-diisopropyl-N-(1-(pyridin-2-yl)ethylidene)aniline (1.05 g, 3.75 mmol) gave the product **L7b** in 29% yield (0.30 g). <sup>1</sup>H NMR (200 MHz, CDCl<sub>3</sub>): δ 8.62 (d, *J*<sub>H-H</sub> = 4.9 Hz, 1H, Py H-6), 7.53 (dt, *J*<sub>H-H</sub> = 1.7, 7.5 Hz, 1H, Py H-4), 7.40 (ddd, *J*<sub>H-H</sub> = 1.1, 4.9, 7.4 Hz, 1H, Py H-5), 7.00~7.20 (m, 1H, Py H-3; 2H, m-Ar; 1H, p-Ar), 4.17 (q, 1H, *J*<sub>H-H</sub> = 6.7 Hz, Py-CH(CH<sub>3</sub>)N), 3.21 (sept, *J*<sub>H-H</sub> = 6.9 Hz, 2H, Ar-CH(CH<sub>3</sub>)<sub>2</sub>), 1.50 (d, 3H, *J*<sub>H-H</sub> = 6.6 Hz, Py-CH(CH<sub>3</sub>)N), 1.21, 1.04 (d, 12H, *J*<sub>H-H</sub> = 6.7, 6.8 Hz, Ar-CH(CH<sub>3</sub>)<sub>2</sub>). <sup>13</sup>C NMR (100.625 MHz, CDCl<sub>3</sub>): δ 163.24 (Py C-2), 149.56 (Py C-6), 142.13 (o-Ar), 141.62 (ipso-Ar), 136.25 (Py C-4), 123.42 (m-Ar), 123.13, 122.09, 121.84 (p-Ar, Py C-5 and Py C-3), 60.94 (Py-CH(CH<sub>3</sub>)N), 27.60 (Ar-CH(CH<sub>3</sub>)<sub>2</sub>), 24.23, 24.17 (Ar-CH(CH<sub>3</sub>)<sub>2</sub>), 21.72 (Py-CH(CH<sub>3</sub>)N).

[<sup>i</sup>PrHNCH<sub>2</sub>(*o*-C<sub>6</sub>H<sub>5</sub>N)]Pd(Me)Cl (**3a**) To a solution of (COD)PdMeCl (50 mg, 0.19 mmol) in Et<sub>2</sub>O (15 mL) was added **L3a** (28 mg, 0.19 mmol) which was dissolved in Et<sub>2</sub>O (5 mL). The mixture was stirred for 1h at room temperature. After filtration, the resulting precipitate was washed twice with Et<sub>2</sub>O (2×5 mL) and dried in *vacuo*. The desired air-stable complex was obtained as pale yellow powder in 96% yield (59 mg). Single crystals suitable for X-ray diffraction were grown by slow diffusion of Et<sub>2</sub>O into a saturated CH<sub>2</sub>Cl<sub>2</sub> solution of **3a**. <sup>1</sup>H NMR (400 MHz, CDCl<sub>3</sub>) for *trans*-**3a**: δ 8.34 (d, *J*<sub>H-H</sub> = 5.4 Hz, 1H, Py H-6), 7.82 (dt, *J*<sub>H-H</sub> = 1.4, 7.7 Hz, 1H, Py H-4), 7.39 (d, *J*<sub>H-H</sub> = 7.8 Hz, 1H, Py H-3), 7.25~7.35 (m, 1H, Py H-5), 4.49 (dd, *J*<sub>H-H</sub> = 6.6, 16.2 Hz, 1H, Py-CH'HN), 3.93 (dd, *J*<sub>H-H</sub> = 3.1, 16.1 Hz, 1H, Py-CH'HN), 3.24 (bs, 1H, NHCH(CH<sub>3</sub>)<sub>2</sub>), 3.18 (sept, *J*<sub>H-H</sub> = 6.9 Hz, 1H, NHCH(CH<sub>3</sub>)<sub>2</sub>), 0.79 (s, 3H, Pd-CH<sub>3</sub>); *cis*-**3a**: δ 8.72 (d, *J*<sub>H-H</sub> = 4.7 Hz, 1H, Py H-6), 7.71 (dt, *J*<sub>H-H</sub> = 1.6, 7.7 Hz, 1H, Py H-4), 7.25~7.35 (m, 1H, Py H-3), 7.20 (t, *J*<sub>H-H</sub> = 6.5 Hz, 1H, Py H-5), 4.75 (dd, *J*<sub>H-H</sub> = 6.5, 16.0 Hz, 1H, Py-CH'HN), 4.56 (bs, 1H, NHCH(CH<sub>3</sub>)<sub>2</sub>), 4.05 (dd, *J*<sub>H-H</sub> = 3.1, 16.1 Hz, 1H, Py-CH'HN), 3.20 (sept, *J*<sub>H-H</sub> = 6.3 Hz, 1H, NHCH(CH<sub>3</sub>)<sub>2</sub>), 0.54 (s, 3H, Pd-CH<sub>3</sub>); 1.27, 1.21, 1.25 (d, d, m, *J*<sub>H-H</sub> = 6.2, 6.4 Hz, 12H, NHCH(CH<sub>3</sub>)<sub>2</sub>). <sup>13</sup>C NMR (100.625 MHz, CDCl<sub>3</sub>) for *trans*-**3a**: δ 163.99 (Py C-2), 148.08 (Py C-6),



This journal is © The Royal Society of Chemistry 2009

137.96 (Py C-4), 123.78 (Py C-5), 122.37 (Py C-3), 52.43 (Py-CH<sub>2</sub>N), 51.34 (NHCH(CH<sub>3</sub>)<sub>2</sub>), 22.34, 21.47 (NHCH(CH<sub>3</sub>)<sub>2</sub>), -0.09 (Pd-CH<sub>3</sub>); **cis-3a**:  $\delta$  159.12 (Py C-2), 148.13 (Py C-6), 138.12 (Py C-4), 123.27 (Py C-5), 120.61 (Py C-3), 54.49 (Py-CH<sub>2</sub>N), 53.47 (NHCH(CH<sub>3</sub>)<sub>2</sub>), 22.00, 21.37 (NHCH(CH<sub>3</sub>)<sub>2</sub>), -8.87 (Pd-CH<sub>3</sub>). MS (FAB, m/z): 255.0 (M<sup>+</sup> - CH<sub>3</sub>- Cl). Anal. Calcd for C<sub>10</sub>H<sub>17</sub>N<sub>2</sub>PdCl: C, 39.10; H, 5.54; N, 9.12. Found: C, 38.52; H, 5.47; N, 9.29.

**[<sup>t</sup>BuHNCH<sub>2</sub>(*o*-C<sub>6</sub>H<sub>5</sub>N)]Pd(Me)Cl (4a)** The synthesis was carried out according to the same procedure as for **3a**, using (COD)PdMeCl (265 mg, 1.00 mmol) and **L4a** (321 mg, 1.00 mmol) to give the pale white product **4a** (278 mg, 85%). Single crystals were grown from Et<sub>2</sub>O/CH<sub>2</sub>Cl<sub>2</sub>. <sup>1</sup>H NMR (400 MHz, CDCl<sub>3</sub>) for **trans-4a**:  $\delta$  8.37 (d,  $J_{\text{H-H}} = 5.5$  Hz, 1H, Py H-6), 7.81 (t,  $J_{\text{H-H}} = 7.7$  Hz, 1H, Py H-4), 7.39 (d,  $J_{\text{H-H}} = 7.7$  Hz, 1H, Py H-3), 7.25~7.35 (m, 1H, Py H-5), 4.50 (dd,  $J_{\text{H-H}} = 7.0, 16.3$  Hz, 1H, Py-CH'HN), 4.05 (d,  $J_{\text{H-H}} = 16.3$  Hz, 1H, Py-CH'HN), 2.97 (d,  $J_{\text{H-H}} = 6.6$  Hz, 1H, NHC(CH<sub>3</sub>)<sub>3</sub>), 1.18 (s, 9H, NHC(CH<sub>3</sub>)<sub>3</sub>), 0.89 (s, 3H, Pd-CH<sub>3</sub>); **cis-4a**:  $\delta$  8.79 (d,  $J_{\text{H-H}} = 4.9$  Hz, 1H, Py H-6), 7.73 (t,  $J_{\text{H-H}} = 7.7$  Hz, 1H, Py H-4), 7.25~7.35 (m, 1H, Py H-3; 1H, Py H-5), 4.82 (dd,  $J_{\text{H-H}} = 6.4, 16.4$  Hz, 1H, Py-CH'HN), 4.23 (d,  $J_{\text{H-H}} = 16.3$  Hz, 1H, Py-CH'HN), 4.05 (1H, NHC(CH<sub>3</sub>)<sub>3</sub>), 1.21 (s, 9H, NHC(CH<sub>3</sub>)<sub>3</sub>), 0.67 (s, 3H, Pd-CH<sub>3</sub>). <sup>13</sup>C NMR (100.625 MHz, CDCl<sub>3</sub>) for **trans-4a**:  $\delta$  164.69 (Py C-2), 148.18 (Py C-6), 138.07 (Py C-4), 123.81 (Py C-5), 122.05 (Py C-3), 55.73 (NHC(CH<sub>3</sub>)<sub>3</sub>), 50.97 (Py-CH<sub>2</sub>N), 29.24 (NHC(CH<sub>3</sub>)<sub>3</sub>), 0.59 (Pd-CH<sub>3</sub>); **cis-4a**:  $\delta$  159.18 (Py C-2), 148.40 (Py C-6), 138.12 (Py C-4), 123.51 (Py C-5), 120.36 (Py C-3), 58.75 (NHC(CH<sub>3</sub>)<sub>3</sub>), 54.30 (Py-CH<sub>2</sub>N), 29.44 (NHC(CH<sub>3</sub>)<sub>3</sub>), -10.16 (Pd-CH<sub>3</sub>). MS (FAB, m/z): 269.0 (M<sup>+</sup> - CH<sub>3</sub>- Cl). Anal. Calcd for C<sub>11</sub>H<sub>19</sub>N<sub>2</sub>PdCl: C, 41.14; H, 5.92; N, 8.73. Found: C, 40.55; H, 5.72; N, 8.62.

**[PhHNCH<sub>2</sub>(*o*-C<sub>6</sub>H<sub>5</sub>N)]Pd(Me)Cl (5a)** The synthesis was carried out according to the same procedure as for **3a**, using (COD)PdMeCl (93 mg, 0.35 mmol) and **L5a** (64 mg, 0.35 mmol) to give the pale brown product **5a** (106 mg, 89%). Single crystals were grown from Et<sub>2</sub>O/CH<sub>2</sub>Cl<sub>2</sub>. <sup>1</sup>H NMR (400 MHz, CDCl<sub>3</sub>) for **trans-5a**:  $\delta$  8.34 (d,  $J_{\text{H-H}} = 5.6$  Hz, 1H, Py H-6), 7.92 (dt,  $J_{\text{H-H}} = 1.5, 7.7$  Hz, 1H, Py H-

This journal is © The Royal Society of Chemistry 2009

4), 7.56 (d,  $J_{\text{H-H}} = 7.8$  Hz, 1H, Py H-3), 7.37 (t,  $J_{\text{H-H}} = 6.7$  Hz, 1H, Py H-5), 7.10~7.21 (m, 2H, m-Ar), 7.02 (t,  $J_{\text{H-H}} = 7.4$  Hz, 1H, p-Ar), 6.97 (d,  $J_{\text{H-H}} = 7.6$  Hz, 2H, o-Ar), 5.87 (bs, 1H, NH-Ar), 0.86 (s, 3H, Pd-CH<sub>3</sub>); **cis-5a**:  $\delta$  8.73 (d,  $J_{\text{H-H}} = 5.3$  Hz, 1H, Py H-6), 7.73 (dt,  $J_{\text{H-H}} = 1.6, 7.7$  Hz, 1H, Py H-4), 7.37 (1H, Py H-3), 7.21~7.32 (m, 2H, m-Ar; 2H, o-Ar), 7.10~7.21 (m, 1H, Py H-5; 1H, p-Ar), 5.02 (dd,  $J_{\text{H-H}} = 6.2, 16.3$  Hz, 1H, Py-CH'HN), 4.49 (dd,  $J_{\text{H-H}} = 6.7, 16.4$  Hz, 1H, Py-CH'HN), 0.24 (s, 3H, Pd-CH<sub>3</sub>). <sup>13</sup>C NMR (100.625 MHz, CDCl<sub>3</sub>) for **trans-5a**:  $\delta$  163.82 (Py C-2), 148.38 (Py C-6), 146.05 (ipso-Ar), 138.46 (Py C-4), 129.19 (m-Ar), 124.07 (Py C-5), 123.89 (p-Ar), 122.38 (Py C-3), 118.61 (o-Ar), 55.50 (Py-CH<sub>2</sub>N), -0.17 (Pd-CH<sub>3</sub>); **cis-5a**:  $\delta$  158.39 (Py C-2), 147.93 (Py C-6), 147.20 (ipso-Ar), 137.83 (Py C-4), 129.19 (m-Ar), 125.79, 123.50 (Py C-5 and p-Ar), 121.85 (o-Ar), 121.59 (Py C-3), 62.86 (Py-CH<sub>2</sub>N), -2.94 (Pd-CH<sub>3</sub>). MS (FAB, m/z): 289.1 (M<sup>+</sup> - CH<sub>3</sub> - Cl). Anal. Calcd for C<sub>13</sub>H<sub>15</sub>N<sub>2</sub>PdCl: C, 45.90; H, 4.41; N, 8.24. Found: C, 46.20; H, 4.50; N, 8.21.

**[(2,6-Me<sub>2</sub>C<sub>6</sub>H<sub>3</sub>)HNCH<sub>2</sub>(o-C<sub>6</sub>H<sub>5</sub>N)]Pd(Me)Cl (**6a**)** The synthesis was carried out according to the same procedure as for **3a**, using (COD)PdMeCl (283 mg, 1.07 mmol) and **L6a** (227 mg, 1.07 mmol) to give the pale white product **6a** (343 mg, 87%). Single crystals were grown from Et<sub>2</sub>O/CH<sub>2</sub>Cl<sub>2</sub>. <sup>1</sup>H NMR (400 MHz, CDCl<sub>3</sub>) for **cis-6a**:  $\delta$  8.72 (d,  $J_{\text{H-H}} = 5.3$  Hz, 1H, Py H-6), 7.70 (dt,  $J_{\text{H-H}} = 1.7, 7.8$  Hz, 1H, Py H-4), 7.22 (d,  $J_{\text{H-H}} = 7.9$  Hz, 1H, Py H-3), 7.00~7.16 (m, 1H, Py H-5; 2H, m-Ar; 1H, p-Ar), 6.68 (t,  $J_{\text{H-H}} = 7.5$  Hz, 1H, NH-Ar), 5.07 (dd,  $J_{\text{H-H}} = 7.6, 17.3$  Hz, 1H, Py-CH'HN), 4.29 (dd,  $J_{\text{H-H}} = 7.3, 17.3$  Hz, 1H, Py-CH'HN), 2.91, 2.51 (s, 6H, Ar-CH<sub>3</sub>), 0.10 (s, 3H, Pd-CH<sub>3</sub>); **trans-6a**:  $\delta$  8.49 (d,  $J_{\text{H-H}} = 6.4$  Hz, 1H, Py H-6), 7.88 (dt,  $J_{\text{H-H}} = 1.4, 7.8$  Hz, 1H, Py H-4), 7.40 (t,  $J_{\text{H-H}} = 7.0$  Hz, 1H, Py H-5), 7.34 (d,  $J_{\text{H-H}} = 7.3$  Hz, 1H, Py H-3), 7.00~7.16 (2H, m-Ar; 1H, p-Ar), 1.00 (s, 3H, Pd-CH<sub>3</sub>). <sup>13</sup>C NMR (100.625 MHz, CDCl<sub>3</sub>) for **cis-6a**:  $\delta$  158.37 (Py C-2), 147.80 (Py C-6), 143.21 (ipso-Ar), 137.58 (Py C-4), 130.82, 129.57 (o-Ar), 131.07, 123.29 (Py C-5 and p-Ar), 128.48, 125.97 (m-Ar), 120.16 (Py C-3), 59.87 (Py-CH<sub>2</sub>N), 20.22, 18.96 (Ar-CH<sub>3</sub>), -6.03 (Pd-CH<sub>3</sub>); **trans-6a**:  $\delta$  147.96 (Py C-6), 138.10 (Py C-4), 125.30, 124.04, 122.13 (Py C-5, Py C-3 and p-Ar), 62.97 (Py-CH<sub>2</sub>N), 0.15 (Pd-CH<sub>3</sub>). MS (FAB,

m/z): 317.0 ( $M^{+1}$  -  $CH_3$  - Cl).

**[(2,6-<sup>i</sup>Pr<sub>2</sub>C<sub>6</sub>H<sub>3</sub>)HNCH<sub>2</sub>(*o*-C<sub>6</sub>H<sub>5</sub>N)]Pd(Me)Cl (**7a**)** The synthesis was carried out according to the same procedure as for **3a**, using (COD)PdMeCl (50 mg, 0.19 mmol) and **L7a** (51 mg, 0.19 mmol) to give the pale yellow product **7a** (59 mg, 73%). <sup>1</sup>H NMR (400 MHz, CDCl<sub>3</sub>) for *cis*-**7a**: δ 8.72 (d,  $J_{H-H}$  = 5.3 Hz, 1H, Py H-6), 7.70 (dt,  $J_{H-H}$  = 1.6, 7.8 Hz, 1H, Py H-4), 7.00~7.24 (m, 1H, Py H-3; 1H, Py H-5; 2H, *m*-Ar; 1H, *p*-Ar), 6.88 (t,  $J_{H-H}$  = 7.3 Hz, 1H, *NH*-Ar), 5.07 (dd,  $J_{H-H}$  = 7.6, 17.3 Hz, 1H, Py-CH'HN), 4.58, 3.46 (sept,  $J_{H-H}$  = 6.7, 6.6 Hz, 2H, Ar-CH(CH<sub>3</sub>)<sub>2</sub>), 4.30 (dd,  $J_{H-H}$  = 7.3, 17.3 Hz, 1H, Py-CH'HN), 1.43, 1.34, 1.33, 1.12 (d,  $J_{H-H}$  = 6.6, 6.4, 6.6, 6.9 Hz, 12H, Ar-CH(CH<sub>3</sub>)<sub>2</sub>), 0.12 (s, 3H, Pd-CH<sub>3</sub>); *trans*-**7a**: δ 8.51 (d,  $J_{H-H}$  = 5.6 Hz, 1H, Py H-6), 7.89 (t,  $J_{H-H}$  = 7.8 Hz, 1H, Py H-4), 7.41 (t,  $J_{H-H}$  = 7.1 Hz, 1H, Py H-5), 7.34 (d,  $J_{H-H}$  = 8.0 Hz, 1H, Py H-3), 7.00~7.24 (m, 2H, *m*-Ar; 1H, *p*-Ar), 5.19 (bs, 1H, *NH*-Ar), 5.31, 4.24 (2H, Py-CH'HN), 4.78, 3.61 (sept,  $J_{H-H}$  = 6.7, 6.6 Hz, 2H, Ar-CH(CH<sub>3</sub>)<sub>2</sub>), 1.71, 1.29 (d,  $J_{H-H}$  = 6.6, 6.8 Hz, 6H, Ar-CH(CH<sub>3</sub>)<sub>2</sub>), 1.20~1.40 (6H, Ar-CH(CH<sub>3</sub>)<sub>2</sub>), 1.02 (s, 3H, Pd-CH<sub>3</sub>). <sup>13</sup>C NMR (100.625 MHz, CDCl<sub>3</sub>) for *cis*-**7a**: δ 157.94 (Py C-2), 148.23 (Py C-6), 142.02 (ipso-Ar), 140.39, 140.07 (*o*-Ar), 137.50 (Py C-4), 126.82, 126.45, 123.42, 123.21, 120.17 (Py C-5, Py C-3, *p*-Ar and *m*-Ar), 62.38 (Py-CH<sub>2</sub>N), 28.28, 27.82 (Ar-C(CH<sub>3</sub>)<sub>2</sub>), 25.11, 24.62, 24.10, 23.57 (Ar-C(CH<sub>3</sub>)<sub>2</sub>), -4.12 (Pd-CH<sub>3</sub>); *trans*-**7a**: δ 167.33 (Py C-2), 149.97 (Py C-6), 139.96, 138.83, 138.75, 138.06 (ipso-Ar, *o*-Ar and Py C-4), 129.07, 127.95, 124.25, 123.58, 122.21 (Py C-5, Py C-3, *p*-Ar and *m*-Ar), 58.54 (Py-CH<sub>2</sub>N), 28.54, 27.90 (Ar-C(CH<sub>3</sub>)<sub>2</sub>), 24.79, 22.61 (Ar-C(CH<sub>3</sub>)<sub>2</sub>), 0.95 (Pd-CH<sub>3</sub>). MS (FAB, m/z): 373.1 ( $M^{+1}$  -  $CH_3$  - Cl). Anal. Calcd for C<sub>19</sub>H<sub>27</sub>N<sub>2</sub>PdCl: C, 53.66; H, 6.35; N, 6.59. Found: C, 53.99; H, 6.43; N, 6.44.

**[<sup>i</sup>PrHNCMeH(*o*-C<sub>6</sub>H<sub>5</sub>N)]Pd(Me)Cl (**3b**)** The synthesis was carried out according to the same procedure as for **3a**, using (COD)PdMeCl (200 mg, 0.75 mmol) and **L3b** (124 mg, 0.75 mmol) to give the pale white product **3b** (214 mg, 89%). Single crystals were grown from Et<sub>2</sub>O/CH<sub>2</sub>Cl<sub>2</sub>. <sup>1</sup>H NMR (400 MHz, CDCl<sub>3</sub>) for *trans*-**3b**: δ 8.41 (d,  $J_{H-H}$  = 5.2 Hz, 1H, Py H-6), 7.84 (dt,  $J_{H-H}$  = 1.6, 7.7 Hz, 1H, Py H-4), 7.20~7.40 (1H, Py H-3; 1H, Py H-5), 4.14 (q,  $J_{H-H}$  = 6.8 Hz, 1H, Py-CH(CH<sub>3</sub>)N), 3.05 (sept,

This journal is © The Royal Society of Chemistry 2009

$J_{\text{H-H}} = 6.6$  Hz, 1H,  $\text{NHCH}(\text{CH}_3)_2$ ), 1.89 (d,  $J_{\text{H-H}} = 6.8$  Hz, 3H,  $\text{Py-CH}(\text{CH}_3)\text{N}$ ), 1.20~1.30 (m, 6H,  $\text{NHCH}(\text{CH}_3)_2$ ), 0.90 (s, 3H,  $\text{Pd-CH}_3$ ); **cis-3b**:  $\delta$  8.84 (d,  $J_{\text{H-H}} = 5.2$  Hz, 1H, Py H-6), 7.77 (dt,  $J_{\text{H-H}} = 1.5$ , 7.7 Hz, 1H, Py H-4), 7.20~7.40 (m, 1H, Py H-3; 1H, Py H-5), 4.24 (q,  $J_{\text{H-H}} = 6.7$  Hz, 1H,  $\text{Py-CH}(\text{CH}_3)\text{N}$ ), 3.09 (sept,  $J_{\text{H-H}} = 6.5$  Hz, 1H,  $\text{NHCH}(\text{CH}_3)_2$ ), 1.89 (d,  $J_{\text{H-H}} = 6.8$  Hz, 3H,  $\text{Py-CH}(\text{CH}_3)\text{N}$ ), 1.20~1.30 (m, 6H,  $\text{NHCH}(\text{CH}_3)_2$ ), 0.59 (s, 3H,  $\text{Pd-CH}_3$ ).  $^{13}\text{C}$  NMR (100.625 MHz,  $\text{CDCl}_3$ ) for **trans-3b**:  $\delta$  168.41 (Py C-2), 138.42 (Py C-4), 60.00 ( $\text{Py-CH}(\text{CH}_3)\text{N}$ ), 52.26 ( $\text{NHCH}(\text{CH}_3)_2$ ), 0.17 ( $\text{Pd-CH}_3$ ); **cis-3b**:  $\delta$  162.65 (Py C-2), 138.42 (Py C-4), 62.77 ( $\text{Py-CH}(\text{CH}_3)\text{N}$ ), 55.22 ( $\text{NHCH}(\text{CH}_3)_2$ ), -11.21 ( $\text{Pd-CH}_3$ ); 148.71, 148.30 (Py C-6) 123.94, 123.70, 121.99, 120.38 (Py C-5 and Py C-3), 25.04, 24.51 ( $\text{Py-CH}(\text{CH}_3)\text{N}$ ), 23.33, 22.97, 22.43, 22.28 ( $\text{NHCH}(\text{CH}_3)_2$ ). MS (FAB, m/z): 269.0 ( $\text{M}^{+1} - \text{CH}_3 - \text{Cl}$ ). Anal. Calcd for  $\text{C}_{11}\text{H}_{19}\text{N}_2\text{PdCl}$ : C, 41.18; H, 5.92; N, 8.73. Found: C, 40.89; H, 5.92; N, 8.53.

**[<sup>t</sup>BuHNMeH(*o*-C<sub>6</sub>H<sub>5</sub>N)]Pd(Me)Cl (4b)** The synthesis was carried out according to the same procedure as for **3a**, using (COD)PdMeCl (150 mg, 0.57 mmol) and **L4b** (101 mg, 0.57 mmol) to give the pale white product **4b** (167 mg, 87%). Single crystals were grown from  $\text{Et}_2\text{O}/\text{CH}_2\text{Cl}_2$ .  $^1\text{H}$  NMR (400 MHz,  $\text{CDCl}_3$ ) for **trans-4b**:  $\delta$  8.38 (d,  $J_{\text{H-H}} = 5.3$  Hz, 1H, Py H-6), 7.83 (dt,  $J_{\text{H-H}} = 1.4$ , 7.7 Hz, 1H, Py H-4), 7.35 (d,  $J_{\text{H-H}} = 7.7$  Hz, 1H, Py H-3), 7.25~7.35 (m, 1H, Py H-5), 4.30 (q,  $J_{\text{H-H}} = 6.7$  Hz, 1H,  $\text{Py-CH}(\text{CH}_3)\text{N}$ ), 2.20 (s, 1H,  $\text{NHC}(\text{CH}_3)_3$ ), 1.96 (d,  $J_{\text{H-H}} = 6.8$  Hz, 3H,  $\text{Py-CH}(\text{CH}_3)\text{N}$ ), 1.19 (s, 9H,  $\text{NHC}(\text{CH}_3)_3$ ), 0.93 (s, 3H,  $\text{Pd-CH}_3$ ); **cis-4b**:  $\delta$  8.80 (d,  $J_{\text{H-H}} = 4.5$  Hz, 1H, Py H-6), 7.76 (dt,  $J_{\text{H-H}} = 1.6$ , 7.7 Hz, 1H, Py H-4), 7.25~7.35 (m, 2H, Py H-3; Py H-5), 4.39 (q,  $J_{\text{H-H}} = 6.7$  Hz, 1H,  $\text{Py-CH}(\text{CH}_3)\text{N}$ ), 2.93 (bs, 1H,  $\text{NHC}(\text{CH}_3)_3$ ), 1.96 (d,  $J_{\text{H-H}} = 6.6$  Hz, 3H,  $\text{Py-CH}(\text{CH}_3)\text{N}$ ), 1.24 (s, 9H,  $\text{NHC}(\text{CH}_3)_3$ ), 0.61 (s, 3H,  $\text{Pd-CH}_3$ ).  $^{13}\text{C}$  NMR (100.625 MHz,  $\text{CDCl}_3$ ) for **trans-4b**:  $\delta$  169.15 (Py C-2), 148.09 (Py C-6), 138.32 (Py C-4), 123.83 (Py C-5), 121.69 (Py C-3), 57.06 ( $\text{Py-CH}(\text{CH}_3)\text{N}$ ), 55.80 ( $\text{NHC}(\text{CH}_3)_3$ ), 29.44 ( $\text{NHC}(\text{CH}_3)_3$ ), 24.79 ( $\text{Py-CH}(\text{CH}_3)\text{N}$ ), 0.65 ( $\text{Pd-CH}_3$ ); **cis-4b**:  $\delta$  163.31 (Py C-2), 148.43 (Py C-6), 138.28 (Py C-4), 123.58 (Py C-5), 120.12 (Py C-3), 60.14 ( $\text{Py-CH}(\text{CH}_3)\text{N}$ ), 58.82 ( $\text{NHC}(\text{CH}_3)_3$ ), 29.70 ( $\text{NHC}(\text{CH}_3)_3$ ), 25.33 ( $\text{Py-CH}(\text{CH}_3)\text{N}$ ), -10.79 ( $\text{Pd-CH}_3$ ). MS (FAB, m/z): 283.0 ( $\text{M}^{+1} - \text{CH}_3 - \text{Cl}$ ). Anal.

Calcd for C<sub>12</sub>H<sub>21</sub>N<sub>2</sub>PdCl: C, 43.19; H, 6.30; N, 8.40. Found: C, 42.38; H, 6.35; N, 8.57.

**[PhHNCMeH(*o*-C<sub>6</sub>H<sub>5</sub>N)]Pd(Me)Cl (5b)** The synthesis was carried out according to the same procedure as for **3a**, using (COD)PdMeCl (265 mg, 1.00 mmol) and **L5b** (198 mg, 1.00 mmol) to give the pale white product **5b** (322 mg, 91%). <sup>1</sup>H NMR (400 MHz, CDCl<sub>3</sub>) for *trans*-**5b**: δ 8.39 (d, *J*<sub>H-H</sub> = 5.0 Hz, 1H, Py H-6), 7.95 (t, *J*<sub>H-H</sub> = 7.7 Hz, 1H, Py H-4), 7.54 (d, *J*<sub>H-H</sub> = 7.4 Hz, 1H, Py H-3), 7.40 (m, 1H, Py H-5), 7.19 (t, *J*<sub>H-H</sub> = 7.8 Hz, 2H, m-Ar), 7.02 (t, *J*<sub>H-H</sub> = 7.0 Hz, 1H, p-Ar), 6.88 (d, *J*<sub>H-H</sub> = 7.6 Hz, 2H, o-Ar), 4.61 (m, 1H, NH-Ar; 1H, Py-CH(CH<sub>3</sub>)N), 2.07 (d, *J*<sub>H-H</sub> = 6.4 Hz, 3H, Py-CH(CH<sub>3</sub>)N), 0.86 (s, 3H, Pd-CH<sub>3</sub>); *cis*-**5b**: δ 8.83 (d, *J*<sub>H-H</sub> = 4.8 Hz, 1H, Py H-6), 7.81 (m, *J*<sub>H-H</sub> = 7.9 Hz, 1H, Py H-4), 7.26 (m, 1H, Py H-3; 1H, Py H-5), 7.19 (2H, o-Ar; 2H, m-Ar; 1H, p-Ar), 5.83 (d, *J*<sub>H-H</sub> = 4.8 Hz, 1H, NH-Ar), 4.61 (1H, Py-CH(CH<sub>3</sub>)N), 1.82 (d, *J*<sub>H-H</sub> = 6.6 Hz, 3H, Py-CH(CH<sub>3</sub>)N), 0.25 (s, 3H, Pd-CH<sub>3</sub>). <sup>13</sup>C NMR (100.625 MHz, CDCl<sub>3</sub>) for *trans*-**5b**: δ 167.58 (Py C-6), 148.67 (Py C-2), 145.25 (ipso-Ar), 138.79 (Py C-4), 129.30 (m-Ar), 124.33 (Py C-3), 123.88 (p-Ar), 122.10 (Py C-5), 118.20 (o-Ar), 61.70 (Py-CH(CH<sub>3</sub>)N), 23.95 (Py-CH(CH<sub>3</sub>)N), -0.04 (Pd-CH<sub>3</sub>); for *cis*-**5b**: δ 161.29 (Py C-6), 148.67 (Py C-2), 146.01 (ipso-Ar), 138.24 (Py C-4), 129.30 (m-Ar), 125.85 (Py C-3), 123.95 (p-Ar), 121.86 (Py C-5), 120.95 (o-Ar), 68.11 (Py-CH(CH<sub>3</sub>)N), 24.05 (Py-CH(CH<sub>3</sub>)N), -4.49 (Pd-CH<sub>3</sub>). MS (ESI/MS, *m/z*): 319.3 (M<sup>+</sup> - Cl). Anal. Calcd for C<sub>14</sub>H<sub>17</sub>N<sub>2</sub>PdCl: C, 47.34; H, 4.79; N, 7.89. Found: C, 46.97; H, 4.53; N, 7.83.

**[(2,6-Me<sub>2</sub>C<sub>6</sub>H<sub>3</sub>)HNCMeH(*o*-C<sub>6</sub>H<sub>5</sub>N)]Pd(Me)Cl (6b)** The synthesis was carried out according to the same procedure as for **3a**, using (COD)PdMeCl (265 mg, 1.00 mmol) and **L6b** (226 mg, 1.00 mmol) to give the pale white product **6b** (332 mg, 87%). Single crystals were grown from Et<sub>2</sub>O/CH<sub>2</sub>Cl<sub>2</sub>. <sup>1</sup>H NMR (400 MHz, CDCl<sub>3</sub>) for *cis*-**6b**: δ 9.10 (d, *J*<sub>H-H</sub> = 4.9 Hz, 1H, Py H-6), 7.86 (dt, *J*<sub>H-H</sub> = 1.7, 7.7 Hz, 1H, Py H-4), 7.40 (t, *J*<sub>H-H</sub> = 7.3 Hz, 1H, Py H-5), 7.30 (d, *J*<sub>H-H</sub> = 8.0 Hz, 1H, Py H-3), 7.15 (m, 1H, p-Ar), 7.07 (m, 2H, m-Ar), 5.50 (d, *J*<sub>H-H</sub> = 7.9 Hz, 1H, NH-Ar), 4.69 (m, 1H, Py-CH(CH<sub>3</sub>)N), 2.91, 2.38 (s, 6H, Ar-CH<sub>3</sub>), 1.62 (d, *J*<sub>H-H</sub> = 6.8 Hz, 3H, Py-CH(CH<sub>3</sub>)N), 0.13 (s, 3H, Pd-CH<sub>3</sub>); *trans*-**6b**: δ 8.54 (d,

This journal is © The Royal Society of Chemistry 2009

$J_{\text{H-H}} = 5.8$  Hz, 1H, Py H-6), 7.91 (dt,  $J_{\text{H-H}} = 1.6, 7.8$  Hz, 1H, Py H-4), 7.40 (1H, Py H-5), 7.34 (1H, Py H-3), 7.03 (m, 2H, m-Ar), 6.95 (m, 1H, p-Ar), 4.69 (1H, NH-Ar), 4.43 (m, 1H, Py-CH(CH<sub>3</sub>)N), 2.51 (bs, 6H, Ar-CH<sub>3</sub>), 1.75 (d,  $J_{\text{H-H}} = 6.9$  Hz, 3H, Py-CH(CH<sub>3</sub>)N), 1.03 (s, 3H, Pd-CH<sub>3</sub>). <sup>13</sup>C NMR (100.625 MHz, CDCl<sub>3</sub>) for **cis-6b**:  $\delta$  160.39 (Py C-2), 148.79 (Py C-6), 141.10 (ipso-Ar), 138.31 (Py C-4), 131.73 (p-Ar), 130.45, 129.20 (o-Ar), 128.58, 126.16 (m-Ar), 124.07 (Py C-5), 121.04 (Py C-3), 65.17 (Py-CH(CH<sub>3</sub>)N), 20.42, 18.73 (Ar-CH<sub>3</sub>), 19.79 (Py-CH(CH<sub>3</sub>)N), -5.18 (Pd-CH<sub>3</sub>); **trans-6b**:  $\delta$  167.23 (Py C-2), 147.89 (Py C-6), 138.31 (Py C-4), 128.60, 128.52, 128.29, 126.55, 124.90, 124.78 (Py C-5, m-Ar, o-Ar and p-Ar), 122.64 (Py C-3), 63.05 (Py-CH(CH<sub>3</sub>)N), 22.75 (Py-CH(CH<sub>3</sub>)N), 17.80, 17.34 (Ar-CH<sub>3</sub>), 0.19 (Pd-CH<sub>3</sub>). MS (ESI/MS, m/z): 331.0 (M<sup>+</sup> - CH<sub>3</sub> - Cl). Anal. Calcd for C<sub>16</sub>H<sub>21</sub>N<sub>2</sub>PdCl: C, 50.15; H, 5.48; N, 7.31. Found: C, 49.50; H, 5.63; N, 7.12.

**[(2,6-<sup>i</sup>Pr<sub>2</sub>C<sub>6</sub>H<sub>3</sub>)HNCMeH(o-C<sub>6</sub>H<sub>5</sub>N)]Pd(Me)Cl (**7b**)** The synthesis was carried out according to the same procedure as for **3a**, using (COD)PdMeCl (50 mg, 0.19 mmol) and **L7b** (54 mg, 0.19 mmol) to give the pale white product **7b** (70 mg, 84%). Single crystals were grown from Et<sub>2</sub>O/CH<sub>2</sub>Cl<sub>2</sub>. <sup>1</sup>H NMR (400 MHz, CDCl<sub>3</sub>) for **cis-7b**:  $\delta$  9.15 (d,  $J_{\text{H-H}} = 5.3$  Hz, 1H, Py H-6), 7.87 (dt,  $J_{\text{H-H}} = 1.6, 7.8$  Hz, 1H, Py H-4), 7.41 (ddd,  $J_{\text{H-H}} = 0.9, 5.3, 7.5$  Hz, 1H, Py H-5), 7.32 (d,  $J_{\text{H-H}} = 8.0$  Hz, 1H, Py H-3), 7.10~7.30 (m, 2H, m-Ar; 1H, p-Ar), 5.80 (d,  $J_{\text{H-H}} = 9.3$  Hz, 1H, NH-Ar), 4.64 (m, 1H, Py-CH(CH<sub>3</sub>)N), 4.56, 2.97 (sept,  $J_{\text{H-H}} = 6.7, 6.7$  Hz, 2H, Ar-CH(CH<sub>3</sub>)<sub>2</sub>), 1.56 (d,  $J_{\text{H-H}} = 6.8$  Hz, 3H, Py-CH(CH<sub>3</sub>)N), 1.42, 1.37, 1.29, 1.21 (d,  $J_{\text{H-H}} = 6.6, 6.6, 6.7, 6.8$  Hz, 12H, Ar-CH(CH<sub>3</sub>)<sub>2</sub>), 0.26 (s, 3H, Pd-CH<sub>3</sub>); **trans-7b**:  $\delta$  8.56 (d,  $J_{\text{H-H}} = 5.4$  Hz, 1H, Py H-6), 7.92 (dt,  $J_{\text{H-H}} = 1.5, 7.7$  Hz, 1H, Py H-4), 7.41 (1H, Py H-5), 7.34 (1H, Py H-3), 7.10~7.30 (m, 2H, m-Ar; 1H, p-Ar), 4.84 (d,  $J_{\text{H-H}} = 6.5$  Hz, 1H, NH-Ar), 4.35 (m, 1H, Py-CH(CH<sub>3</sub>)N), 3.08 (sept,  $J_{\text{H-H}} = 6.7$  Hz, 2H, Ar-CH(CH<sub>3</sub>)<sub>2</sub>), 1.64 (d,  $J_{\text{H-H}} = 6.8$  Hz, 3H, Py-CH(CH<sub>3</sub>)N), 1.48, 1.09 (d,  $J_{\text{H-H}} = 6.4, 6.8$  Hz, 6H, Ar-CH(CH<sub>3</sub>)<sub>2</sub>), 1.37 (6H, Ar-CH(CH<sub>3</sub>)<sub>2</sub>), 1.01 (s, 3H, Pd-CH<sub>3</sub>). <sup>13</sup>C NMR (100.625 MHz, CDCl<sub>3</sub>) for **cis-7b**:  $\delta$  159.94 (Py C-2), 148.94 (Py C-6), 141.74 (ipso-Ar), 138.32 (Py C-4), 140.12, 137.66 (o-Ar), 126.97, 126.70, 124.15, 123.41, 121.21 (Py C-5, Py C-3, m-Ar

This journal is © The Royal Society of Chemistry 2009

and p-Ar), 66.51 (Py-CH(CH<sub>3</sub>)N), 28.42, 28.39 (Ar-CH(CH<sub>3</sub>)<sub>2</sub>), 24.89, 24.49, 24.13, 23.57 (Ar-CH(CH<sub>3</sub>)<sub>2</sub>), 18.52 (Py-CH(CH<sub>3</sub>)N), -3.00 (Pd-CH<sub>3</sub>); **trans-7b**: δ 166.09 (Py C-2), 148.20 (Py C-6), 141.79, 140.64, 138.91, 138.20 (ipso-Ar, o-Ar and Py C-4), 125.99, 125.85, 123.83, 123.15, 122.75 (Py C-5, Py C-3, m-Ar and p-Ar), 63.81 (Py-C(CH<sub>3</sub>)N), 28.77, 28.53 (Ar-CH(CH<sub>3</sub>)<sub>2</sub>), 24.28, 23.36 (Ar-CH(CH<sub>3</sub>)<sub>2</sub>), 20.69 (Py-CH(CH<sub>3</sub>)N), -0.06 (Pd-CH<sub>3</sub>). MS (FAB/MS, m/z): 387.1 (M<sup>+</sup> - CH<sub>3</sub> - Cl). Anal. Calcd for C<sub>20</sub>H<sub>29</sub>N<sub>2</sub>PdCl: C, 54.69; H, 6.61; N, 6.38. Found: C, 54.48; H, 6.50; N, 6.38.

{[<sup>i</sup>PrHNCH<sub>2</sub>(*o*-C<sub>6</sub>H<sub>5</sub>N)]Pd(Me)(NCMe)}(BF<sub>4</sub>) (**3a'**) A Schlenk flask was charged with complex **3a** (120 mg, 0.39 mmol) and AgBF<sub>4</sub> (76 mg, 0.39 mmol) in a glovebox, followed with CH<sub>2</sub>Cl<sub>2</sub> (15 mL) and MeCN (1 mL). The mixture was stirred at 25 °C for 2 h. The residue of AgCl and Pd were removed by filtering through celite. The resulting pale yellow solution was concentrated in *vacuo* and then precipitated by addition of Et<sub>2</sub>O (20 mL). After filtration, the crude product was washed with Et<sub>2</sub>O (2×5 mL) and dried in *vacuo*. The desired air-sensitive complex was obtained as pale white powder in 56% yield (87 mg). Alternatively, one-pot reaction with (COD)PdMeCl, AgBF<sub>4</sub>, **L3a**, CH<sub>2</sub>Cl<sub>2</sub> and MeCN also provided the desired product. Single crystals were grown from Et<sub>2</sub>O/MeCN/CH<sub>2</sub>Cl<sub>2</sub> solution. <sup>1</sup>H NMR (400 MHz, CDCl<sub>3</sub>) for **trans-3a'**: δ 8.26 (d, *J*<sub>H-H</sub> = 5.6 Hz, 1H, Py H-6), 7.91 (t, *J*<sub>H-H</sub> = 7.7 Hz, 1H, Py H-4), 7.50 (d, *J*<sub>H-H</sub> = 7.9 Hz, 1H, Py H-3), 7.37 (t, *J*<sub>H-H</sub> = 6.6 Hz, 1H, Py H-5), 4.51 (dd, *J*<sub>H-H</sub> = 6.3, 16.5 Hz, 1H, Py-CH'HN), 4.14 (bs, 1H, NHCH(CH<sub>3</sub>)<sub>2</sub>), 3.97 (d, *J*<sub>H-H</sub> = 16.5 Hz, 1H, Py-CH'HN), 2.89 (qd, *J*<sub>H-H</sub> = 6.3, 6.4 Hz, 1H, NHCH(CH<sub>3</sub>)<sub>2</sub>), 2.39 (s, 3H, NCCH<sub>3</sub>), 1.22, 1.14 (d, *J*<sub>H-H</sub> = 6.3, 6.4 Hz, 6H, NHCH(CH<sub>3</sub>)<sub>2</sub>), 0.79 (s, 3H, Pd-CH<sub>3</sub>); **cis-3a'**: δ 8.42 (d, *J*<sub>H-H</sub> = 4.9 Hz, 1H, Py H-6), 7.84 (t, *J*<sub>H-H</sub> = 7.8 Hz, 1H, Py H-4), 7.46 (d, *J*<sub>H-H</sub> = 6.4 Hz, 1H, Py H-3), 7.43 (t, *J*<sub>H-H</sub> = 7.6 Hz, 1H, Py H-5), 4.65 (bs, 1H, NHCH(CH<sub>3</sub>)<sub>2</sub>), 4.63 (dd, *J*<sub>H-H</sub> = 5.9, 16.7 Hz, 1H, Py-CH'HN), 4.12 (d, *J*<sub>H-H</sub> = 16.6 Hz, 1H, Py-CH'HN), 3.03 (m, 1H, NHCH(CH<sub>3</sub>)<sub>2</sub>), 2.45 (s, 3H, NCCH<sub>3</sub>), 1.17 (d, *J*<sub>H-H</sub> = 6.5 Hz, 3H, NHCH(CH<sub>3</sub>)<sub>2</sub>), 1.12~1.15 (3H, NHCH(CH<sub>3</sub>)<sub>2</sub>), 0.65 (s, 3H, Pd-CH<sub>3</sub>). <sup>13</sup>C NMR (100.625 MHz, CDCl<sub>3</sub>) for **trans-3a'**: δ 164.80 (Py C-2), 148.28 (Py C-6), 139.66 (Py C-4), 124.12 (Py C-5), 122.09 (Py C-3), 53.85 (Py-CH<sub>2</sub>N), 52.44

This journal is © The Royal Society of Chemistry 2009

(NHCH(CH<sub>3</sub>)<sub>2</sub>), 22.48, 21.39 (NHCH(CH<sub>3</sub>)<sub>2</sub>), 3.25 (NCCH<sub>3</sub>), 1.82 (Pd-CH<sub>3</sub>); **cis-3a'**: δ 158.97 (Py C-2), 148.38 (Py C-6), 139.21 (Py C-4), 124.38 (Py C-5), 121.56 (Py C-3), 56.68 (Py-CH<sub>2</sub>N), 55.37 (NHCH(CH<sub>3</sub>)<sub>2</sub>), 22.41, 21.78 (NHCH(CH<sub>3</sub>)<sub>2</sub>), 3.18 (NCCH<sub>3</sub>), -7.32 (Pd-CH<sub>3</sub>). MS (FAB, m/z): 312.0 (M<sup>+</sup>), 271.0 (M<sup>+</sup> - CH<sub>3</sub>), 254.9 (M<sup>+</sup> - CH<sub>3</sub>- NCCH<sub>3</sub>). Anal. Calcd for C<sub>12</sub>H<sub>20</sub>N<sub>3</sub>PdBF<sub>4</sub>: C, 36.07; H, 5.01; N, 10.52. Found: C, 35.89; H, 4.73; N, 10.52.

**{[<sup>t</sup>BuHNCH<sub>2</sub>(*o*-C<sub>6</sub>H<sub>5</sub>N)]Pd(Me)(NCMe)}(BF<sub>4</sub>) (4a')** The synthesis was carried out according to the same procedure as for **3a'**, using **4a** (200 mg, 0.60 mmol) and AgBF<sub>4</sub> (116 mg, 0.60 mmol) to give the pale white product **4a'** (164 mg, 66%). Single crystals were grown from Et<sub>2</sub>O/MeCN/CH<sub>2</sub>Cl<sub>2</sub>. <sup>1</sup>H NMR (400 MHz, CDCl<sub>3</sub>) for **trans-4a'**: δ 8.26 (d, *J*<sub>H-H</sub> = 5.3 Hz, 1H, Py H-6), 7.89 (dt, *J*<sub>H-H</sub> = 1.5, 7.7 Hz, 1H, Py H-4), 7.50 (d, *J*<sub>H-H</sub> = 7.8 Hz, 1H, Py H-3), 7.34 (t, *J*<sub>H-H</sub> = 6.6 Hz, 1H, Py H-5), 4.52 (dd, *J*<sub>H-H</sub> = 7.2, 17.1 Hz, 1H, Py-CH'HN), 4.39 (d, *J*<sub>H-H</sub> = 7.1 Hz, 1H, NHC(CH<sub>3</sub>)<sub>3</sub>), 4.11 (d, *J*<sub>H-H</sub> = 17.1 Hz, 1H, Py-CH'HN), 2.42 (s, 3H, NCCH<sub>3</sub>), 1.61 (s, 9H, NHC(CH<sub>3</sub>)<sub>3</sub>), 0.81 (s, 3H, Pd-CH<sub>3</sub>). <sup>13</sup>C NMR (100.625 MHz, CDCl<sub>3</sub>) for **trans-4a'**: δ 166.39 (Py C-2), 148.00 (Py C-6), 139.64 (Py C-4), 123.87 (Py C-5), 122.60 (Py C-3), 56.05 (NHC(CH<sub>3</sub>)<sub>3</sub>), 50.81 (Py-CH<sub>2</sub>N), 28.60 (NHC(CH<sub>3</sub>)<sub>3</sub>), 3.38 (NCCH<sub>3</sub>), 2.07 (Pd-CH<sub>3</sub>). MS (FAB, m/z): 268.9 (M<sup>+</sup> - CH<sub>3</sub>- NCCH<sub>3</sub>). Anal. Calcd for C<sub>13</sub>H<sub>22</sub>N<sub>3</sub>PdBF<sub>4</sub>: C, 37.75; H, 5.32; N, 10.16. Found: C, 37.65; H, 5.31; N, 10.16.

**{[PhHNCH<sub>2</sub>(*o*-C<sub>6</sub>H<sub>5</sub>N)]Pd(Me)(NCMe)}(BF<sub>4</sub>) (5a')** The synthesis was carried out according to the same procedure as for **3a'**, using **5a** (150 mg, 0.44 mmol) and AgBF<sub>4</sub> (86 mg, 0.44 mmol) to give the pale white product **5a'** (100 mg, 52%). Single crystals were grown from Et<sub>2</sub>O/MeCN/CH<sub>2</sub>Cl<sub>2</sub>. <sup>1</sup>H NMR (400 MHz, CDCl<sub>3</sub>) for **trans-5a'**: δ 8.27 (d, *J*<sub>H-H</sub> = 5.7 Hz, 1H, Py H-6), 8.01 (dt, *J*<sub>H-H</sub> = 1.6, 7.7 Hz, 1H, Py H-4), 7.63 (d, *J*<sub>H-H</sub> = 7.9 Hz, 1H, Py H-3), 7.43 (t, *J*<sub>H-H</sub> = 6.4 Hz, 1H, Py H-5), 7.25 (t, *J*<sub>H-H</sub> = 7.7 Hz, 2H, *m*-Ar), 7.08 (dt, *J*<sub>H-H</sub> = 1.1, 7.4 Hz, 1H, *p*-Ar), 6.93 (d, *J*<sub>H-H</sub> = 8.4 Hz, 2H, *o*-Ar), 6.59 (d, *J*<sub>H-H</sub> = 6.1 Hz, 1H, *NH*-Ar), 4.93 (dd, *J*<sub>H-H</sub> = 6.4, 16.7 Hz, 1H, Py-CH'HN), 4.36 (d, *J*<sub>H-H</sub> = 16.1 Hz, 1H, Py-CH'HN), 2.34 (s, 3H, NCCH<sub>3</sub>), 0.89 (s, 3H, Pd-CH<sub>3</sub>). <sup>13</sup>C NMR (100.625 MHz, CDCl<sub>3</sub>) for **trans-5a'**: δ



This journal is © The Royal Society of Chemistry 2009

164.65 (Py C-2), 148.35 (Py C-6), 146.14 (ipso-Ar), 139.96 (Py C-4), 129.57 (m-Ar), 124.42 (p-Ar), 124.35 (Py C-5), 122.99 (Py C-3), 118.87 (o-Ar), 57.84 (Py-CH<sub>2</sub>N), 3.25 (NCCH<sub>3</sub>), 2.02 (Pd-CH<sub>3</sub>). MS (FAB, m/z): 305.0 (M<sup>+</sup> - CH<sub>3</sub>). Anal. Calcd for C<sub>15</sub>H<sub>18</sub>N<sub>3</sub>PdBF<sub>4</sub>: C, 41.55; H, 4.15; N, 9.69. Found: C, 41.82; H, 3.86; N, 9.59.

**{[(2,6-Me<sub>2</sub>C<sub>6</sub>H<sub>3</sub>)HNCH<sub>2</sub>(o-C<sub>6</sub>H<sub>5</sub>N)]Pd(Me)(NCMe)}(BF<sub>4</sub>) (6a')** The synthesis was carried out according to the same procedure as for **3a'**, using **6a** (200 mg, 0.54 mmol) and AgBF<sub>4</sub> (105 mg, 0.54 mmol) to give the pale white product **6a'** (207 mg, 83%). <sup>1</sup>H NMR (400 MHz, CDCl<sub>3</sub>) for *trans*-**6a'**: δ 8.31 (d, J<sub>H-H</sub> = 5.8 Hz, 1H, Py H-6), 7.94 (dt, J<sub>H-H</sub> = 1.5, 7.8 Hz, 1H, Py H-4), 7.52 (1H, Py H-3), 7.41 (1H, Py H-5), 6.95~7.15 (m, 2H, m-Ar; 1H, p-Ar), 5.89 (t, J<sub>H-H</sub> = 7.6 Hz, 1H, NH-Ar), 4.82 (1H, Py-CH'HN), 4.48 (dd, J<sub>H-H</sub> = 9.3, 17.1 Hz, 1H, Py-CH'HN), 2.76 (bs, 6H, Ar-CH<sub>3</sub>), 1.85 (s, 3H, NCCH<sub>3</sub>), 0.98 (s, 3H, Pd-CH<sub>3</sub>); *cis*-**6a'**: δ 8.49 (d, J<sub>H-H</sub> = 5.3 Hz, 1H, Py H-6), 7.87 (dt, J<sub>H-H</sub> = 1.6, 7.8 Hz, 1H, Py H-4), 7.51 (1H, Py H-5), 7.40 (1H, Py H-3), 6.95~7.15 (m, 2H, m-Ar; 1H, p-Ar), 6.48 (t, J<sub>H-H</sub> = 7.7 Hz, 1H, NH-Ar), 4.82 (dd, J<sub>H-H</sub> = 6.5, 16.9 Hz, 1H, Py-CH'HN), 4.40 (dd, J<sub>H-H</sub> = 8.4, 16.6 Hz, 1H, Py-CH'HN), 2.90, 2.42 (s, 6H, Ar-CH<sub>3</sub>), 2.45 (s, 3H, NCCH<sub>3</sub>), 0.17 (s, 3H, Pd-CH<sub>3</sub>). <sup>13</sup>C NMR (100.625 MHz, CDCl<sub>3</sub>) for *trans*-**6a'**: δ 163.47 (Py C-2), 147.75 (Py C-6), 141.55 (ipso-Ar), 139.62 (Py C-4), 125.60 (p-Ar), 124.24 (Py C-5), 123.40 (Py C-3), 55.00 (Py-CH<sub>2</sub>N), 2.74 (NCCH<sub>3</sub>), 2.15 (Pd-CH<sub>3</sub>); *cis*-**6a'**: δ 157.36 (Py C-2), 148.33 (Py C-6), 141.63 (ipso-Ar), 139.09 (Py C-4), 131.20 (p-Ar), 124.60 (Py C-5), 121.44 (Py C-3), 60.51 (Py-CH<sub>2</sub>N), 3.37 (NCCH<sub>3</sub>), -1.35 (Pd-CH<sub>3</sub>); 130.09, 129.99, 129.91, 129.82 (o-Ar), 128.92, 126.74 (m-Ar), 20.15, 19.70, 18.06, 18.00 (Ar-CH<sub>3</sub>). MS (FAB, m/z): 374.1 (M<sup>+</sup>), 317.0 (M<sup>+</sup> - CH<sub>3</sub> - NCCH<sub>3</sub>). Anal. Calcd for C<sub>17</sub>H<sub>22</sub>N<sub>3</sub>PdBF<sub>4</sub>: C, 44.24; H, 4.77; N, 9.11. Found: C, 43.93; H, 4.85; N, 9.20.

**{[(2,6-<sup>1</sup>Pr<sub>2</sub>C<sub>6</sub>H<sub>3</sub>)HNCH<sub>2</sub>(o-C<sub>6</sub>H<sub>5</sub>N)]Pd(Me)(NCMe)}(BF<sub>4</sub>) (7a')** The synthesis was carried out according to the same procedure as for **3a'**, using **7a** (150 mg, 0.35 mmol) and AgBF<sub>4</sub> (69 mg, 0.35 mmol) to give the pale white product **7a'** (120 mg, 66%). <sup>1</sup>H NMR (400 MHz, CDCl<sub>3</sub>) for *trans*-**7a'**: δ

This journal is © The Royal Society of Chemistry 2009

8.33 (d,  $J_{\text{H-H}} = 6.1$  Hz, 1H, Py H-6), 7.95 (dt,  $J_{\text{H-H}} = 1.5, 7.8$  Hz, 1H, Py H-4), 7.55 (d,  $J_{\text{H-H}} = 7.9$  Hz, 1H, Py H-3), 7.43 (t,  $J_{\text{H-H}} = 6.4$  Hz, 1H, Py H-5), 7.00~7.30 (m, 2H, m-Ar; 1H, p-Ar), 5.98 (t,  $J_{\text{H-H}} = 8.3$  Hz, 1H, NH-Ar), 4.88 (dd,  $J_{\text{H-H}} = 6.1, 16.9$  Hz, 1H, Py-CH'HN), 4.54, 3.40 (bs, 2H, Ar-CH(CH<sub>3</sub>)<sub>2</sub>), 4.33 (dd,  $J_{\text{H-H}} = 9.5, 17.4$  Hz, 1H, Py-CH'HN), 1.81 (s, 3H, NCCH<sub>3</sub>), 1.43, 1.37, 1.31 (d,  $J_{\text{H-H}} = 6.6, 6.6, 6.8$  Hz, 12H, Ar-CH(CH<sub>3</sub>)<sub>2</sub>), 0.97 (s, 3H, Pd-CH<sub>3</sub>); **cis-7a'**:  $\delta$  8.65 (d,  $J_{\text{H-H}} = 5.1$  Hz, 1H, Py H-6), 7.89 (t,  $J_{\text{H-H}} = 8.34$  Hz, 1H, Py H-4), 7.65 (t,  $J_{\text{H-H}} = 6.5$  Hz, 1H, Py H-5), 7.39 (d,  $J_{\text{H-H}} = 7.9$  Hz, 1H, Py H-3), 7.00~7.30 (m, 2H, m-Ar; 1H, p-Ar), 6.45 (t,  $J_{\text{H-H}} = 7.2$  Hz, 1H, NH-Ar), 4.71 (dd,  $J_{\text{H-H}} = 6.0, 16.8$  Hz, 1H, Py-CH'HN), 4.46, 3.16 (sept,  $J_{\text{H-H}} = 6.8, 6.9$  Hz, 2H, Ar-CH(CH<sub>3</sub>)<sub>2</sub>), 4.42 (dd,  $J_{\text{H-H}} = 6.4, 16.0$  Hz, 1H, Py-CH'HN), 2.49 (s, 3H, NCCH<sub>3</sub>), 1.10~1.50 (12H, Ar-CH(CH<sub>3</sub>)<sub>2</sub>), 0.29 (s, 3H, Pd-CH<sub>3</sub>). <sup>13</sup>C NMR (100.625 MHz, CDCl<sub>3</sub>) for **trans-7a'**:  $\delta$  163.49 (Py C-2), 147.80 (Py C-6), 139.69 (Py C-4), 126.51, 124.34, 123.43, 121.26 (p-Ar, m-Ar, Py C-5 and Py C-3), 57.80 (Py-CH<sub>2</sub>N), 28.00 (Ar-C(CH<sub>3</sub>)<sub>2</sub>), 24.98, 24.19, 23.93, 23.86 (Ar-C(CH<sub>3</sub>)<sub>2</sub>), 2.61 (NCCH<sub>3</sub>), 2.11 (Pd-CH<sub>3</sub>); **cis-7a'**:  $\delta$  149.02 (Py C-6), 139.20 (Py C-4), 127.68, 126.58, 125.13, 123.64 (p-Ar, m-Ar, Py C-5 and Py C-3), 63.04 (Py-CH<sub>2</sub>N), 28.26 (Ar-C(CH<sub>3</sub>)<sub>2</sub>), 23.27, 22.59 (Ar-C(CH<sub>3</sub>)<sub>2</sub>), 3.43 (NCCH<sub>3</sub>), 0.63 (Pd-CH<sub>3</sub>); 131.38, 140.17, 138.90, 138.18 (ipso-Ar and o-Ar). MS (FAB, m/z): 430.2 (M<sup>+</sup>), 373.1 (M<sup>+</sup> - CH<sub>3</sub> - NCCH<sub>3</sub>). Anal. Calcd for C<sub>21</sub>H<sub>30</sub>N<sub>3</sub>PdBF<sub>4</sub>: C, 48.89; H, 5.82; N, 8.15. Found: C, 48.59; H, 5.53; N, 7.54.

**{[<sup>1</sup>PrHNCMeH(o-C<sub>6</sub>H<sub>5</sub>N)]Pd(Me)(NCMe)}(BF<sub>4</sub>) (3b')** The synthesis was carried out according to the same procedure as for **3a'**, using **3b** (300 mg, 0.93 mmol) and AgBF<sub>4</sub> (182 mg, 0.93 mmol) to give the pale white product **3b'** (290 mg, 75%). Single crystals were grown from Et<sub>2</sub>O/MeCN/CH<sub>2</sub>Cl<sub>2</sub>. <sup>1</sup>H NMR (400 MHz, CDCl<sub>3</sub>) for **trans-3b'**:  $\delta$  8.27 (d,  $J_{\text{H-H}} = 5.3$  Hz, 1H, Py H-6), 7.88 (dt,  $J_{\text{H-H}} = 1.4, 7.7$  Hz, 1H, Py H-4), 7.46 (d,  $J_{\text{H-H}} = 7.8$  Hz, 1H, Py H-3), 7.33 (dt,  $J_{\text{H-H}} = 1.2, 7.2$  Hz, 1H, Py H-5), 4.22 (q,  $J_{\text{H-H}} = 6.7$  Hz, 1H, Py-CH(CH<sub>3</sub>)N), 2.83 (qd,  $J_{\text{H-H}} = 6.4, 12.9$  Hz, 1H, NHCH(CH<sub>3</sub>)<sub>2</sub>), 2.39 (s, 3H, NCCH<sub>3</sub>), 1.87 (d,  $J_{\text{H-H}} = 6.5$  Hz, 3H, Py-CH(CH<sub>3</sub>)N), 1.23, 1.16 (d,  $J_{\text{H-H}} = 6.4, 6.5$  Hz, 6H, NHCH(CH<sub>3</sub>)<sub>2</sub>), 0.81 (s, 3H, Pd-CH<sub>3</sub>); **cis-3b'**:  $\delta$  8.42 (d,  $J_{\text{H-H}} = 5.3$  Hz, 1H, Py H-6), 7.88 (dt,  $J_{\text{H-H}} = 0.8,$

This journal is © The Royal Society of Chemistry 2009

7.7 Hz, 1H, Py H-4), 7.46 (t,  $J_{\text{H-H}} = 6.4$  Hz, 1H, Py H-5), 7.43 (d,  $J_{\text{H-H}} = 7.9$  Hz, 1H, Py H-3), 4.32 (q,  $J_{\text{H-H}} = 6.7$  Hz, 1H, Py-CH(CH<sub>3</sub>)N), 3.02 (qd,  $J_{\text{H-H}} = 6.4, 11.6$  Hz, 1H, NHCH(CH<sub>3</sub>)<sub>2</sub>), 2.44 (s, 3H, NCCH<sub>3</sub>), 1.82 (d,  $J_{\text{H-H}} = 6.7$  Hz, 3H, Py-CH(CH<sub>3</sub>)N), 1.52, 1.13 (d,  $J_{\text{H-H}} = 6.5, 6.5$  Hz, 6H, NHCH(CH<sub>3</sub>)<sub>2</sub>), 0.66 (s, 3H, Pd-CH<sub>3</sub>). <sup>13</sup>C NMR (100.625 MHz, CDCl<sub>3</sub>) for **trans-3b'**: δ 168.69 (Py C-2), 148.38 (Py C-6), 139.61 (Py C-4), 124.05 (Py C-5), 122.68 (Py C-3), 60.86 (Py-CH(CH<sub>3</sub>)N), 52.45 (NHCH(CH<sub>3</sub>)<sub>2</sub>), 23.80 (Py-CH(CH<sub>3</sub>)N), 22.78, 21.50 (NHCH(CH<sub>3</sub>)<sub>2</sub>), 3.29 (NCCH<sub>3</sub>), 1.58 (Pd-CH<sub>3</sub>); **cis-3b'**: δ 162.99 (Py C-2), 148.55 (Py C-6), 139.61 (Py C-4), 124.54 (Py C-5), 121.52 (Py C-3), 64.08 (Py-CH(CH<sub>3</sub>)N), 55.67 (NHCH(CH<sub>3</sub>)<sub>2</sub>), 24.68 (Py-CH(CH<sub>3</sub>)N), 23.29, 22.23 (NHCH(CH<sub>3</sub>)<sub>2</sub>), 3.23 (NCCH<sub>3</sub>), -8.20 (Pd-CH<sub>3</sub>). MS (FAB, m/z): 326.0 (M<sup>+</sup>), 269.0 (M<sup>+</sup> - CH<sub>3</sub> - NCCH<sub>3</sub>). Anal. Calcd for C<sub>13</sub>H<sub>22</sub>N<sub>3</sub>PdBF<sub>4</sub>: C, 37.83; H, 5.34; N, 10.19. Found: C, 37.54; H, 5.00; N, 9.93.

**{[<sup>t</sup>BuHNMeH(*o*-C<sub>6</sub>H<sub>5</sub>N)]Pd(Me)(NCMe)}(BF<sub>4</sub>) (**4b'**)** The synthesis was carried out according to the same procedure as for **3a'**, using **4b** (130 mg, 0.39 mmol) and AgBF<sub>4</sub> (76 mg, 0.39 mmol) to give the pale white product **4b'** (90 mg, 54%). Single crystals were grown from Et<sub>2</sub>O/MeCN/CH<sub>2</sub>Cl<sub>2</sub>. <sup>1</sup>H NMR (100 MHz, CDCl<sub>3</sub>) for **trans-4b'**: δ 8.24 (d,  $J_{\text{H-H}} = 5.5$  Hz, 1H, Py H-6), 7.87 (dt,  $J_{\text{H-H}} = 1.3, 7.7$  Hz, 1H, Py H-4), 7.45 (d,  $J_{\text{H-H}} = 7.9$  Hz, 1H, Py H-3), 7.31 (dt,  $J_{\text{H-H}} = 1.3, 7.2$  Hz, 1H, Py H-5), 4.34 (q,  $J_{\text{H-H}} = 6.8$  Hz, 1H, Py-CH(CH<sub>3</sub>)N), 3.92 (bs, 1H, NHC(CH<sub>3</sub>)<sub>3</sub>), 2.42 (s, 3H, NCCH<sub>3</sub>), 1.91 (d,  $J_{\text{H-H}} = 6.8$  Hz, 3H, Py-CH(CH<sub>3</sub>)N), 1.15 (s, 9H, NHC(CH<sub>3</sub>)<sub>3</sub>), 0.79 (s, 3H, Pd-CH<sub>3</sub>). <sup>13</sup>C NMR (100.625 MHz, CDCl<sub>3</sub>) for **trans-4b'**: δ 171.19 (Py C-3), 147.96 (Py C-6), 139.74 (Py C-4), 123.78 (Py C-5), 122.24 (Py C-3), 57.51 (Py-CH(CH<sub>3</sub>)N), 56.26 (NHC(CH<sub>3</sub>)<sub>3</sub>), 28.70 (NHC(CH<sub>3</sub>)<sub>3</sub>), 24.36 (Py-CH(CH<sub>3</sub>)N), 3.45 (NCCH<sub>3</sub>), 2.09 (Pd-CH<sub>3</sub>). MS (FAB, m/z): 340.0 (M<sup>+</sup>), 283.0 (M<sup>+</sup> - CH<sub>3</sub> - NCCH<sub>3</sub>). Anal. Calcd for C<sub>14</sub>H<sub>24</sub>N<sub>3</sub>PdBF<sub>4</sub>: C, 39.46; H, 5.64; N, 9.86. Found: C, 39.35; H, 5.45; N, 10.32.

**{[PhHNMeH(*o*-C<sub>6</sub>H<sub>5</sub>N)]Pd(Me)(NCMe)}(BF<sub>4</sub>) (**5b'**)** The synthesis was carried out according to the same procedure as for **3a'**, using **5b** (250 mg, 0.71 mmol) and AgBF<sub>4</sub> (138 mg, 0.71 mmol) to give the pale white product **5b'** (206 mg, 58%). <sup>1</sup>H NMR (400 MHz, CD<sub>3</sub>CN) for **trans-5b'**: δ 8.32 (d,  $J_{\text{H-H}}$

This journal is © The Royal Society of Chemistry 2009

= 5.4 Hz, 1H, Py H-6),  $\delta$  8.11 (dt,  $J_{\text{H-H}} = 1.3, 7.8$  Hz, 1H, Py H-4),  $\delta$  7.71 (d,  $J_{\text{H-H}} = 7.9$  Hz, 1H, Py H-3),  $\delta$  7.51 (t,  $J_{\text{H-H}} = 6.2$  Hz, 1H, Py H-5),  $\delta$  7.31 (t,  $J_{\text{H-H}} = 6.2$  Hz, 2H, m-Ar),  $\delta$  7.12 (t,  $J_{\text{H-H}} = 7.4$  Hz, 1H, p-Ar),  $\delta$  6.89 (d,  $J_{\text{H-H}} = 7.9$  Hz, 2H, o-Ar),  $\delta$  5.78 (bs, 1H, NH-Ar),  $\delta$  4.79 (dq,  $J_{\text{H-H}} = 2.8, 6.7$  Hz 1H, Py-CH(CH<sub>3</sub>)N),  $\delta$  1.97 (m, 3H, NCCH<sub>3</sub>),  $\delta$  1.77 (m,  $J_{\text{H-H}} = 6.4$  Hz, 3H, Py-CH(CH<sub>3</sub>)N),  $\delta$  0.91 (s, 3H, Pd-CH<sub>3</sub>); **cis-5b'**:  $\delta$  8.50 (d,  $J_{\text{H-H}} = 4.7$  Hz, 1H, Py H-6),  $\delta$  8.06 (m, 1H, Py H-4),  $\delta$  7.49 ~ 7.58 (m, 1H, Py H-3; 1H, Py H-5),  $\delta$  7.27 (m, 2H, o-Ar),  $\delta$  7.21 (t,  $J_{\text{H-H}} = 7.3$  Hz, 1H, p-Ar),  $\delta$  7.05 (d,  $J_{\text{H-H}} = 7.9$  Hz, 2H, m-Ar),  $\delta$  6.15 (bs, 1H, NH-Ar),  $\delta$  4.69 (m, 1H, Py-CH(CH<sub>3</sub>)N),  $\delta$  2.16 (s, 3H, NCCH<sub>3</sub>),  $\delta$  1.77 (m, 3H, Py-CH(CH<sub>3</sub>)N),  $\delta$  0.56 (s, 3H, Pd-CH<sub>3</sub>). <sup>13</sup>C NMR (100.625 MHz, D<sup>6</sup>-acetone) for **trans-5b'**:  $\delta$  168.94 (Py C-2), 149.74 (Py C-6), 146.44 (ipso-Ar), 141.80 (Py C-4), 130.33 (m-Ar), 125.86 (Py C-5), 125.03 (p-Ar), 124.34 (Py C-3), 122.34 (NCCH<sub>3</sub>), 119.97 (o-Ar), 62.37 (Py-CH(CH<sub>3</sub>)N), 22.26 (Py-CH(CH<sub>3</sub>)N), 2.77 (NCCH<sub>3</sub>), 1.39 (Pd-CH<sub>3</sub>); for **cis-5b'**:  $\delta$  163.72 (Py C-2), 149.67 (Py C-6), 147.25 (ipso-Ar), 141.18 (Py C-4), 130.49 (m-Ar), 127.10, 125.79, 123.91, 123.15 (Py C-5, p-Ar, Py C-3, o-Ar), 70.01 (Py-CH(CH<sub>3</sub>)N), 22.77 (Py-CH(CH<sub>3</sub>)N), 3.15 (NCCH<sub>3</sub>), -4.04 (Pd-CH<sub>3</sub>). Anal. Calcd for C<sub>16</sub>H<sub>20</sub>BF<sub>4</sub>N<sub>3</sub>Pd: C, 42.94; H, 4.50; N, 9.39. Found: C, 43.94; H, 4.85; N, 8.66.

**[(2,6-Me<sub>2</sub>C<sub>6</sub>H<sub>3</sub>)HNCMeH(o-C<sub>6</sub>H<sub>5</sub>N)]Pd(Me)(NCMe)}(BF<sub>4</sub>) (**6b'**)** The synthesis was carried out according to the same procedure as for **3a'**, using **6b** (100 mg, 0.26 mmol) and AgBF<sub>4</sub> (51 mg, 0.26 mmol) to give the pale white product **6b'** (60 mg, 48%). Single crystals were grown from Et<sub>2</sub>O/MeCN/CH<sub>2</sub>Cl<sub>2</sub>. <sup>1</sup>H NMR (400 MHz, CDCl<sub>3</sub>, 298K) for **trans-6b'**:  $\delta$  8.37 (d,  $J_{\text{H-H}} = 5.7$  Hz, 1H, Py H-6), 8.04 (dt,  $J_{\text{H-H}} = 1.5, 7.9$  Hz, 1H, Py H-4), 7.54 (d,  $J_{\text{H-H}} = 7.9$  Hz, 1H, Py H-3), 7.47 (d,  $J_{\text{H-H}} = 6.6$  Hz, 1H, Py H-5), 6.95~7.20 (m, 2H, m-Ar; 1H, p-Ar), 5.20 (bs, 1H, NH-Ar), 4.82 (qd,  $J_{\text{H-H}} = 6.7, 9.5$  Hz, 1H, Py-CH(CH<sub>3</sub>)N), 1.84 (NCCH<sub>3</sub>), 0.95 (s, 3H, Pd-CH<sub>3</sub>); **cis-6b'**:  $\delta$  8.62 (d,  $J_{\text{H-H}} = 5.3$  Hz, 1H, Py H-6), 7.95 (dt,  $J_{\text{H-H}} = 1.6, 8.0$  Hz, 1H, Py H-4), 7.60 (dt,  $J_{\text{H-H}} = 1.1, 6.5$  Hz, 1H, Py H-5), 7.42 (1H,  $J_{\text{H-H}} = 7.9$  Hz, Py H-3), 6.95~7.20 (m, 2H, m-Ar; 1H, p-Ar), 5.69 (d,  $J_{\text{H-H}} = 9.0$  Hz, 1H, Py-CH(CH<sub>3</sub>)N), 4.71 (qd,  $J_{\text{H-H}} = 7.1, 7.4$  Hz, 1H, Py-CH(CH<sub>3</sub>)N), 2.85, 2.36 (s, 6H, Ar-CH<sub>3</sub>), 2.48 (NCCH<sub>3</sub>), 0.09 (s, 3H, Pd-

$CH_3$ ). 1.60 (m, 6H, Py-CH( $CH_3$ )N).  $^1H$  NMR (500 MHz,  $CD_2Cl_2$ , 253K) for **trans-6b'**:  $\delta$  8.37 (d,  $J_{H-H}$  = 5.7 Hz, 1H, Py H-6), 8.04 (dt,  $J_{H-H}$  = 1.5, 7.9 Hz, 1H, Py H-4), 7.52 (m, 1H, Py H-3; 1H, Py H-5), 7.20~7.20 (m, 2H, m-Ar; 1H, p-Ar), 4.90 (d,  $J_{H-H}$  = 10.8 Hz, 1H, NH-Ar), 4.84 (m, 1H, Py-CH( $CH_3$ )N), 3.01, 2.34 (s, 6H, Ar- $CH_3$ ), 1.79 (NCCH $_3$ ), 0.92 (s, 3H, Pd- $CH_3$ ); **cis-6b'**:  $\delta$  8.62 (d,  $J_{H-H}$  = 5.3 Hz, 1H, Py H-6), 7.95 (dt,  $J_{H-H}$  = 1.6, 8.0 Hz, 1H, Py H-4), 7.60 (t,  $J_{H-H}$  = 6.5 Hz, 1H, Py H-5), 7.43 (1H,  $J_{H-H}$  = 8.0 Hz, Py H-3), 7.00~7.20 (m, 2H, m-Ar; 1H, p-Ar), 5.63 (d,  $J_{H-H}$  = 9.2 Hz, 1H, NH-Ar), 4.72 (m, 1H, Py-CH( $CH_3$ )N), 2.87, 2.33 (s, 6H, Ar- $CH_3$ ), 2.45 (NCCH $_3$ ), 0.04 (s, 3H, Pd- $CH_3$ ); 1.55 (d,  $J_{H-H}$  = 6.6 Hz, 6H, Py-CH( $CH_3$ )N).  $^{13}C$  NMR (100.625 MHz,  $CDCl_3$ , 298K) for **trans-6b'**:  $\delta$  164.99 (Py C-2), 148.91 (Py C-6), 140.37 (ipso-Ar), 140.22 (Py C-4), 60.07 (Py-CH( $CH_3$ )N), 20.13, 18.44 (Ar- $CH_3$ ), 18.32 (Py-CH( $CH_3$ )N), 3.10 (NCCH $_3$ ), 2.00 (Pd- $CH_3$ ); **cis-6b'**:  $\delta$  159.71 (Py C-2), 148.32 (Py C-6), 140.02 (ipso-Ar), 139.65 (Py C-4), 66.57 (Py-CH( $CH_3$ )N), 18.62, 18.44 (Ar- $CH_3$ ), 18.32 (Py-CH( $CH_3$ )N), 3.35 (NCCH $_3$ ), -1.08 (Pd- $CH_3$ ); 131.88, 131.36, 129.32, 128.96, 126.85, 125.92 (m-Ar and p-Ar), 130.35, 130.19, 130.10, 129.90 (o-Ar), 125.35, 124.76, 123.95, 122.08 (Py C-3 and Py C-5). MS (FAB/MS, m/z): 388.1 ( $M^{+1}$ ), 331.0 ( $M^{+1}$  -  $CH_3$  - NCCH $_3$ ). Anal. Calcd for  $C_{18}H_{24}N_3PdBF_4$ : C, 45.45; H, 5.05; N, 8.84. Found: C, 45.89; H, 4.57; N, 9.74.

**{[(2,6- $^iPr_2C_6H_3$ )HNCMeH(*o*- $C_6H_5N$ )]Pd(Me)(NCMe)}(BF $_4$ ) (7b')** The synthesis was carried out according to the same procedure as for **3a'**, using **7b** (150 mg, 0.34 mmol) and AgBF $_4$  (66 mg, 0.34 mmol) to give the pale white product **7b'** (137 mg, 76%).  $^1H$  NMR (400 MHz,  $CDCl_3$ ) for **trans-7b'**:  $\delta$  8.40 (d,  $J_{H-H}$  = 5.6 Hz, 1H, Py H-6), 8.08 (dt,  $J_{H-H}$  = 1.5, 7.8 Hz, 1H, Py H-4), 7.56 (d,  $J_{H-H}$  = 8.0 Hz, 1H, Py H-3), 7.51 (t,  $J_{H-H}$  = 6.3 Hz, 1H, Py H-5), , 7.15~7.23 (m, 2H, m-Ar; 1H, p-Ar), 5.55 (d,  $J_{H-H}$  = 10.3 Hz, 1H, NH-Ar), 4.62 (m, 1H, Py-CH( $CH_3$ )N), 4.55, 3.17 (sept,  $J_{H-H}$  = 6.9, 6.7 Hz, 2H, Ar-CH( $CH_3$ ) $_2$ ), 1.61 (d,  $J_{H-H}$  = 6.7 Hz, 3H, Py-CH( $CH_3$ )N), 1.44, 1.30 (d,  $J_{H-H}$  = 6.6, 6.8 Hz, 6H, Ar-CH( $CH_3$ ) $_2$ ), 1.81 (s, 1H, NCCH $_3$ ), 0.96 (s, 3H, Pd- $CH_3$ ); **cis-7b'**:  $\delta$  8.72 (d,  $J_{H-H}$  = 4.7 Hz, 1H, Py H-6), 7.98 (dt,  $J_{H-H}$  = 1.5, 7.8 Hz, 1H, Py H-4), 7.69 (t,  $J_{H-H}$  = 6.4 Hz, 1H, Py H-5), 7.41 (d,  $J_{H-H}$  = 8.0 Hz, 1H, Py H-3), 7.15~7.23

This journal is © The Royal Society of Chemistry 2009

(m, 2H, m-Ar; 1H, p-Ar), 5.79 (d,  $J_{\text{H-H}} = 9.3$  Hz, 1H, NH-Ar), 4.62 (m, 1H, Py-CH(CH<sub>3</sub>)N), 4.30, 2.98 (sept,  $J_{\text{H-H}} = 6.6, 6.6$  Hz, 2H, Ar-CH(CH<sub>3</sub>)<sub>2</sub>), 1.56 (d,  $J_{\text{H-H}} = 6.8$  Hz, 3H, Py-CH(CH<sub>3</sub>)N), 2.50 (s, 1H, NCCH<sub>3</sub>), 0.25 (s, 3H, Pd-CH<sub>3</sub>); 1.39, 1.36, 1.35 (d,  $J_{\text{H-H}} = 6.7, 6.4, 6.5$  Hz, 9H, Ar-CH(CH<sub>3</sub>)<sub>2</sub>), 1.23 (m, 9H, Ar-CH(CH<sub>3</sub>)<sub>2</sub>). <sup>13</sup>C NMR (100.625 MHz, CDCl<sub>3</sub>) for *trans-7b'*: δ 164.69 (Py C-2), 148.47 (Py C-6), 140.33 (Py C-4), 62.30 (Py-C(CH<sub>3</sub>)N), 29.17, 28.04 (Ar-CH(CH<sub>3</sub>)<sub>2</sub>), 17.34 (Py-C(CH<sub>3</sub>)N), 2.92 (NCCH<sub>3</sub>), 2.00 (Pd-CH<sub>3</sub>); *cis-7b'*: δ 159.09 (Py C-2), 149.41 (Py C-6), 139.71 (Py C-4), 68.08 (Py-C(CH<sub>3</sub>)N), 28.74, 28.30 (Ar-CH(CH<sub>3</sub>)<sub>2</sub>), 17.79 (Py-C(CH<sub>3</sub>)N), 3.42 (NCCH<sub>3</sub>), 1.18 (Pd-CH<sub>3</sub>); 25.43, 24.86, 24.73, 24.50, 24.43, 23.89, 23.36, 22.54 (Ar-CH(CH<sub>3</sub>)<sub>2</sub>), 141.47, 141.22, 140.91, 140.49 (o-Ar), 136.93, 136.89 (ipso-Ar), 127.66, 126.80, 126.64, 126.16, 125.76, 124.89, 124.00, 123.81, 123.70, 121.93 (m-Ar, p-Ar, Py C-3 and Py C-5). MS (FAB, m/z): 444.2 (M<sup>+</sup>), 387.1 (M<sup>+</sup> - CH<sub>3</sub> - NCCH<sub>3</sub>). Anal. Calcd for C<sub>22</sub>H<sub>31</sub>N<sub>3</sub>PdBF<sub>4</sub>: C, 49.69; H, 6.02; N, 7.91. Found: C, 48.89; H, 6.09; N, 7.53.

## Determination of norbornene content and alternating percentage for copolymers

The norbornene content,  $X_{\text{NB}}$  was evaluated with use of <sup>13</sup>C NMR integrations as designated in the following table according to Eq. (1) used by Kaminsky.<sup>1</sup>

$$X_{\text{NB}} = \frac{I(\text{A})}{I(\text{B}) + I(\text{C}) + I(\text{D}) - 1.5 I(\text{A})} \quad (1-1)$$

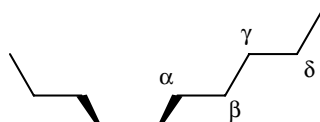

**Table S1** Assignments of ethylene/norbornene copolymers in <sup>13</sup>C NMR spectra

| Signal area | δ ( <sup>13</sup> C NMR) (ppm) | Assignments |
|-------------|--------------------------------|-------------|
|-------------|--------------------------------|-------------|

|   |           |                                                                           |
|---|-----------|---------------------------------------------------------------------------|
| A | 51 - 45   | C2, C3                                                                    |
| B | 43 - 37   | C1, C4                                                                    |
| C | 37 - 32.3 | C7                                                                        |
| D | 32.3 - 28 | C5, C6, C <sub>α</sub> , C <sub>β</sub> , C <sub>γ</sub> , C <sub>δ</sub> |

The alternating percentage in a copolymer may be calculated according to Eq. (1-2).

$$\text{Alternating\%} = 2 \times \text{single NB mol \%} + \text{NB Diads mol \%} + 2/3 \times \text{NB Triads mol \%} \quad (1-2)$$

**Figure S1** Examples of ethylene/norbornene copolymer and block copolymers

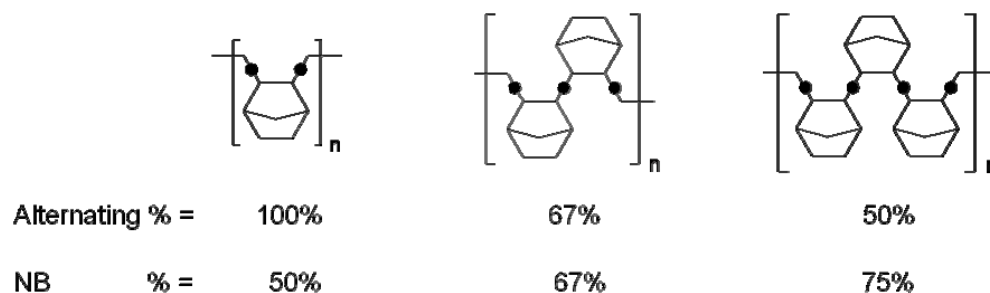

## Determination of ethylene concentration

To obtain ethylene concentrations for our system, an experiment was conducted using a digitally monitored ethylene reservoir which provided ethylene of a specific pressure on demand to a stirred stainless reactor.<sup>2</sup> CH<sub>2</sub>Cl<sub>2</sub> (*V* solution=50 mL) was injected into the reactor with a nitrogen back pressure and equilibrated at 25 °C. The solution was marginally degassed of N<sub>2</sub> gas without stirring by passing ethylene (100, 200, 300, 400 and 500 psi) over the headspace. To initiate the dissolution experiment, mechanical stirring was activated, and the initial pressure of the reservoir was noted. The solution was stirred for 20-30 min to ensure complete saturation, and then the final head and reservoir pressures were noted. The data collected were used to obtain the number of moles dissolved ( $\Delta n$ ) at each pressure according to the ideal gas law:  $\Delta PV = \Delta nRT$ , where  $\Delta P$  is the total change in reservoir pressure for a given head pressure, *V* is the volume of the reservoir system (50 L), *R* is the gas constant (1.206 L·psi/mol·K), and *T* is the reservoir temperature (299 K). The results was shown below.

**Table S2** Ethylene concentration under different pressure in CH<sub>2</sub>Cl<sub>2</sub>

| Ethylene<br>(psi) | Reservoir ΔP<br>(psi) | Δn<br>(moles) | Observed [E]<br>(M) |
|-------------------|-----------------------|---------------|---------------------|
| 100               | 16.67                 | 0.027         | 0.56                |
| 200               | 33.33                 | 0.055         | 1.11                |
| 300               | 50.00                 | 0.083         | 1.66                |
| 400               | 66.67                 | 0.111         | 2.22                |
| 500               | 83.33                 | 0.138         | 2.77                |

## Fineman-Ross plot

The copolymer compositions were determined according to the literature.<sup>3</sup>

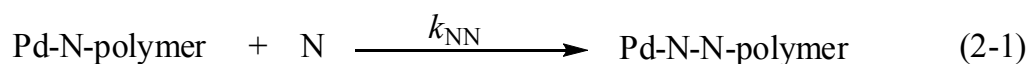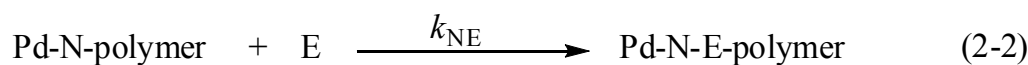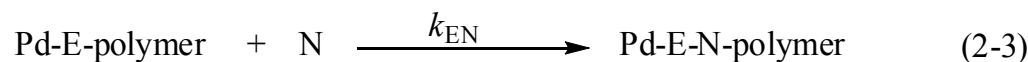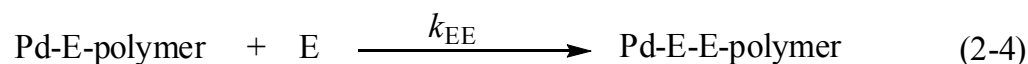

Where Pd-N-polymer and Pd-E-polymer are the growing chain with norbornene and ethylene as the last inserted monomer, and the reactivity ratios are defined as  $r_1 = k_{\text{NN}}/k_{\text{NE}}$  and  $r_2 = k_{\text{EE}}/k_{\text{EN}}$ . By using quasi-steady-state assumption for propagation, the copolymer composition equation can be derived as:

$$\left(\frac{[\text{N}]}{[\text{E}]}\right)_{\text{polymer}} = \frac{[\text{N}]}{[\text{E}]} \frac{\left(1 + r_1 \frac{[\text{N}]}{[\text{E}]}\right)}{\left(r_2 + \frac{[\text{N}]}{[\text{E}]}\right)} \quad (3)$$

where  $([\text{E}]/[\text{N}])_{\text{polymer}}$  and  $([\text{E}]/[\text{N}])$  are the ethylene and norbornene molar ratios in the copolymer and the bulk reaction solution. Further replacement of  $([\text{N}]/[\text{E}])_{\text{polymer}}$  and  $([\text{N}]/[\text{E}])$  to  $f$  and  $F$ , the following Fineman-Ross equation can be derived as:

$$\frac{(f - 1)}{f} F = r_1 \frac{F^2}{f} - r_2 \quad (4)$$

**Table S3** Fineman-Ross data of ethylene/norbornene copolymerization catalyzed by **3b'**



| NB (g) | NB Conc. (M) | E Conc. (M) | $F$ ([N]/[E]) | NB % ( $^{13}\text{C}$ NMR) | $f$ ( $([N]/[E])_{\text{polymer}}$ ) | $F^2/f$  | $F(f-1)/f$ |
|--------|--------------|-------------|---------------|-----------------------------|--------------------------------------|----------|------------|
| 0.5    | 0.11         | 1.66        | 0.066265      | 42.0                        | 0.724138                             | 0.006064 | -0.02524   |
| 1      | 0.21         | 1.66        | 0.126506      | 42.5                        | 0.73913                              | 0.021652 | -0.04465   |
| 3      | 0.64         | 1.66        | 0.385542      | 49.4                        | 0.976285                             | 0.152254 | -0.00937   |
| 5      | 1.06         | 1.66        | 0.638554      | 54.0                        | 1.173913                             | 0.347344 | 0.094601   |
| 10     | 2.13         | 1.66        | 1.283133      | 52.4                        | 1.10084                              | 1.495611 | 0.117539   |
| 20     | 4.26         | 1.66        | 2.566265      | 53.3                        | 1.141328                             | 5.770224 | 0.317774   |
| 30     | 6.38         | 1.66        | 3.843373      | 59.6                        | 1.475248                             | 10.01291 | 1.238134   |

### Correlation of $T_g$ and norbornene content determined from $^{13}\text{C}$ NMR data

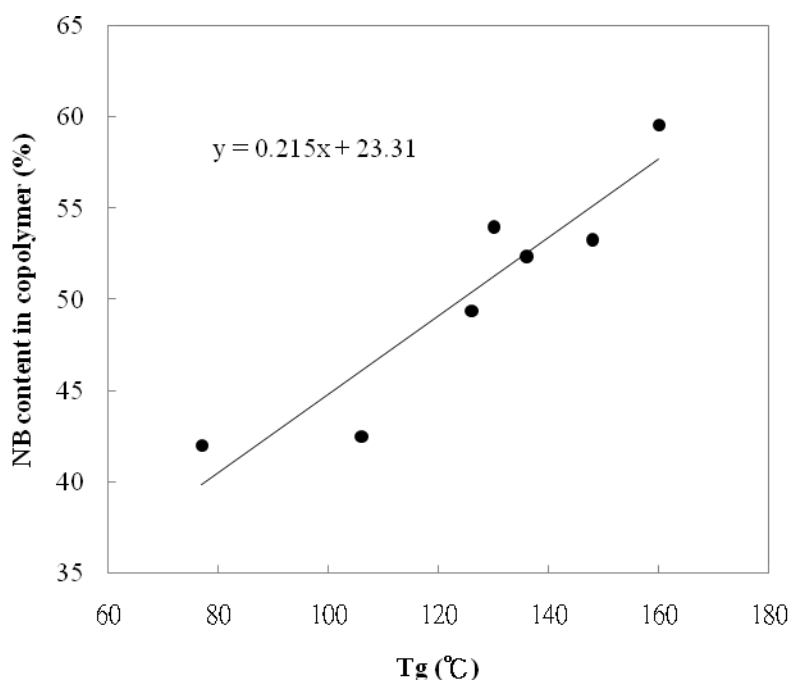

**Figure S2** Norbornene content in copolymer as a function of the glass transition temperature  $T_g$

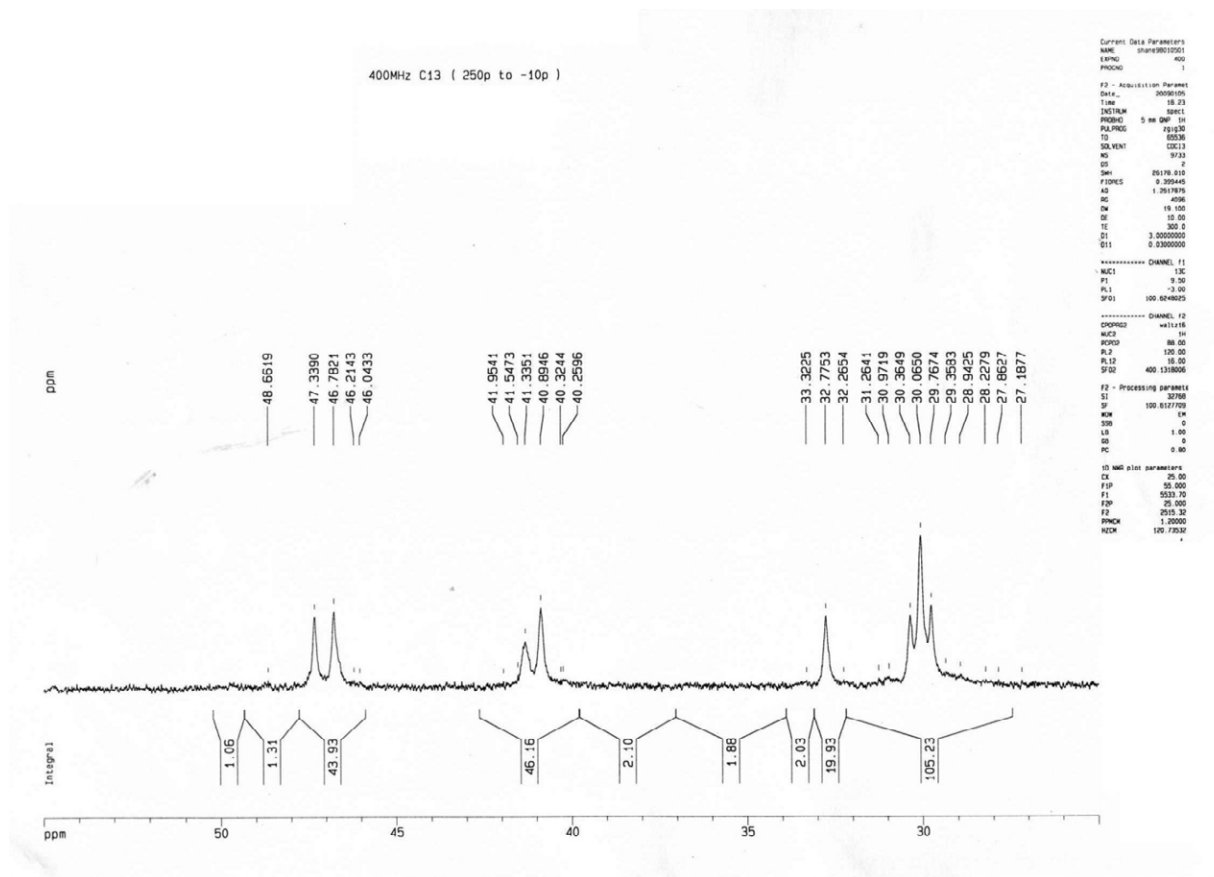

Figure S3 Ethylene/norbornene copolymer catalyzed by **3b'** with 1 g of norbornene feeding

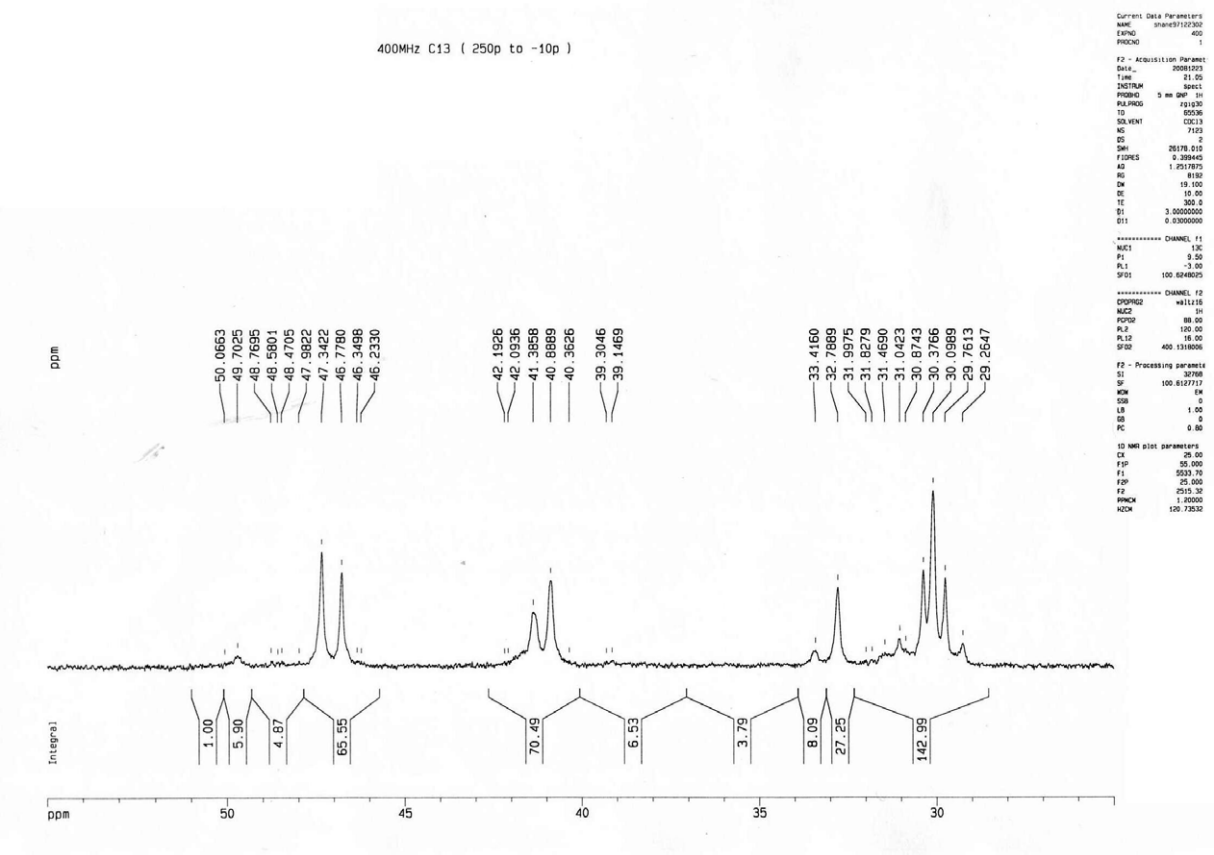

Figure S4 Ethylene/norbornene copolymer catalyzed by **3b'** with 5 g of norbornene feeding

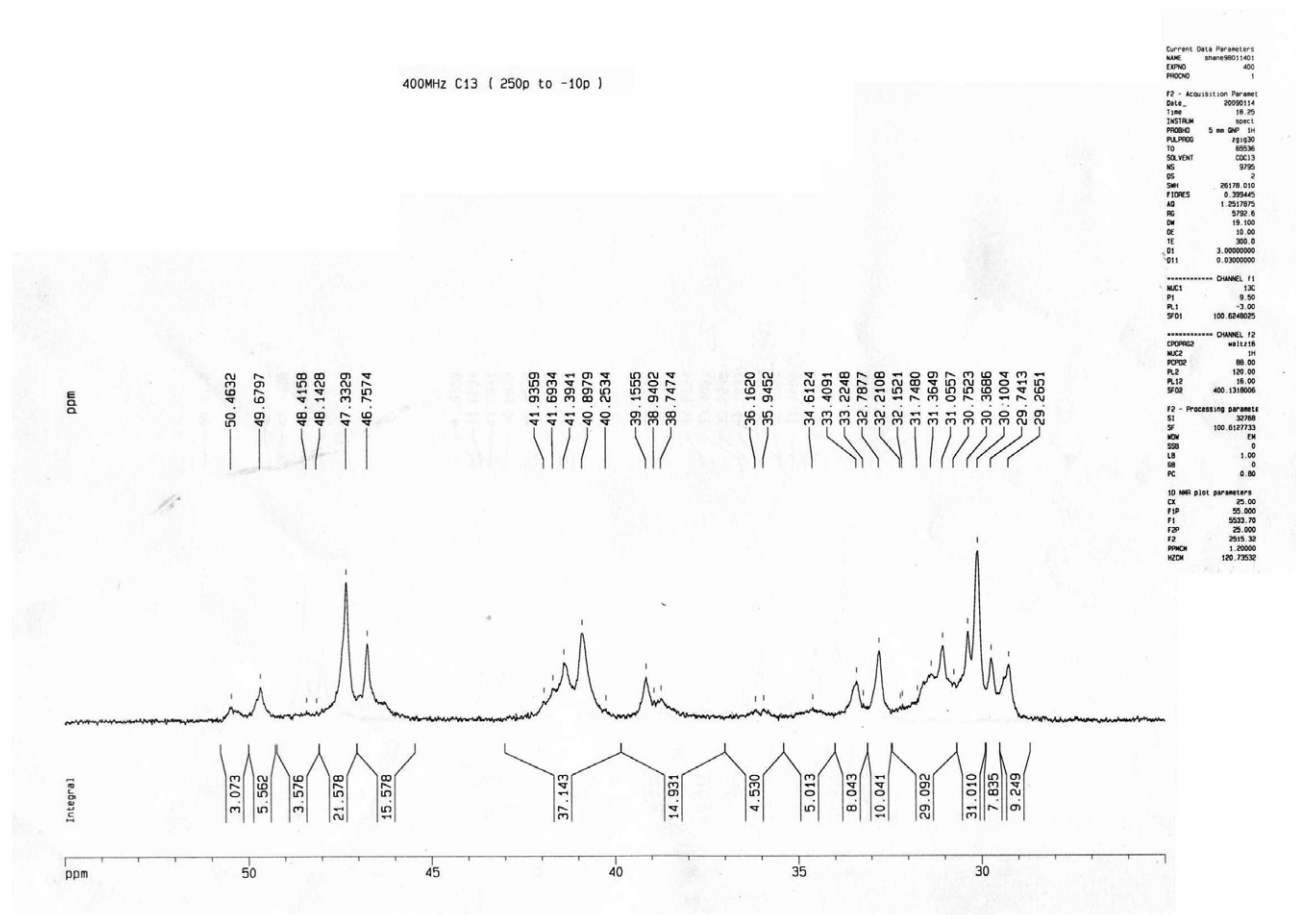

Figure S5 Ethylene/norbornene copolymer catalyzed by **3b'** with 30 g of norbornene feeding

## Kinetic data and spectra of variable temperature NMR

Table S4 Kinetic data for restricted rotation

| Compound<br>( <i>trans</i> form) | $(CH_3)_2$ -Ar<br>(ppm) | $\Delta\nu$<br>(Hz) | $K_c$<br>(S <sup>-1</sup> ) | $T_{coal.}$<br>(K) | $\Delta G^\ddagger$<br>(KJ/mol) |
|----------------------------------|-------------------------|---------------------|-----------------------------|--------------------|---------------------------------|
| <b>6a'</b>                       | 3.0113    2.3936        | 308.85              | 685.65                      | 303                | 58.00                           |
| <b>6b</b>                        | 2.5480    2.4020        | 73.00               | 162.06                      | 313                | 61.42                           |
| <b>6b'</b>                       | 3.0120    2.3363        | 227.85              | 750.03                      | 323                | 58.56                           |

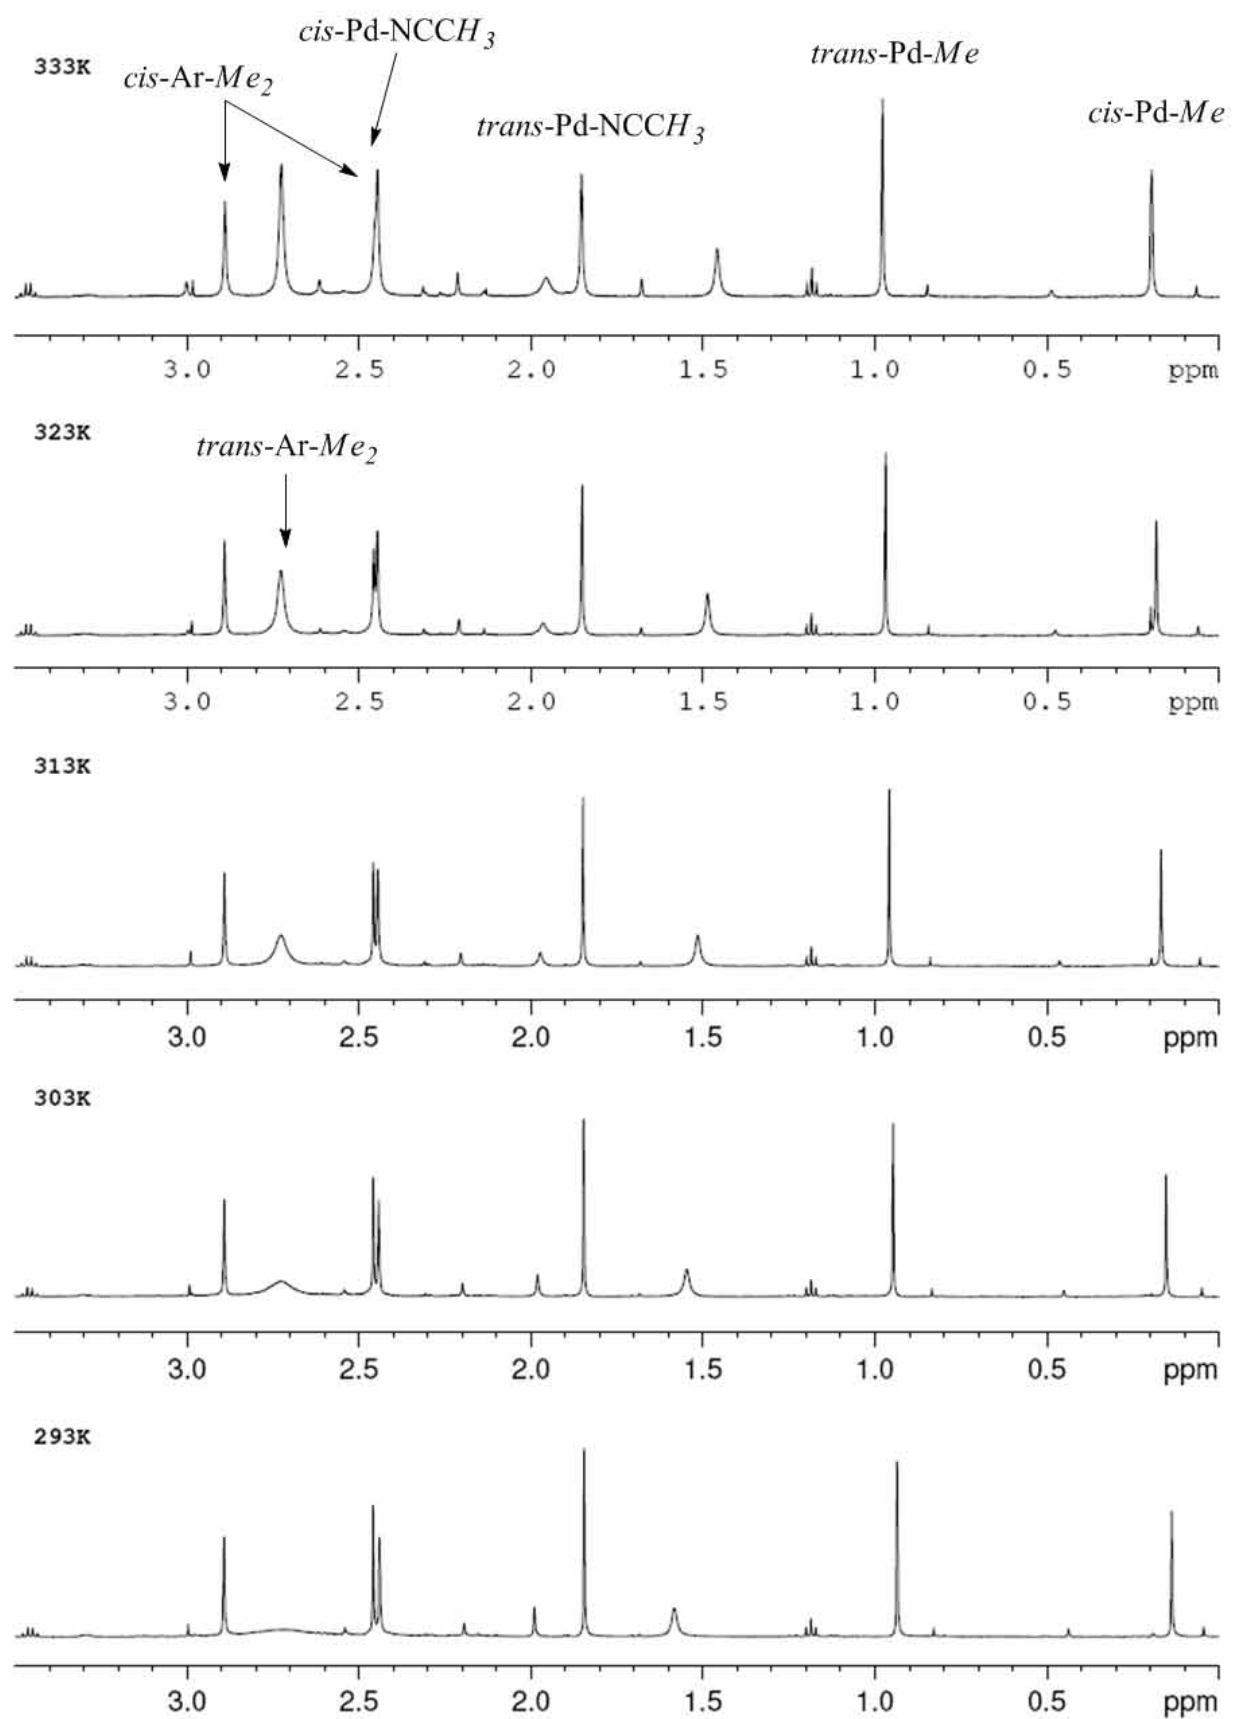

**Figure S6**  $^1\text{H}$  NMR spectra of **6a'** in  $\text{CD}_2\text{Cl}_2$  from 293 K to 333K

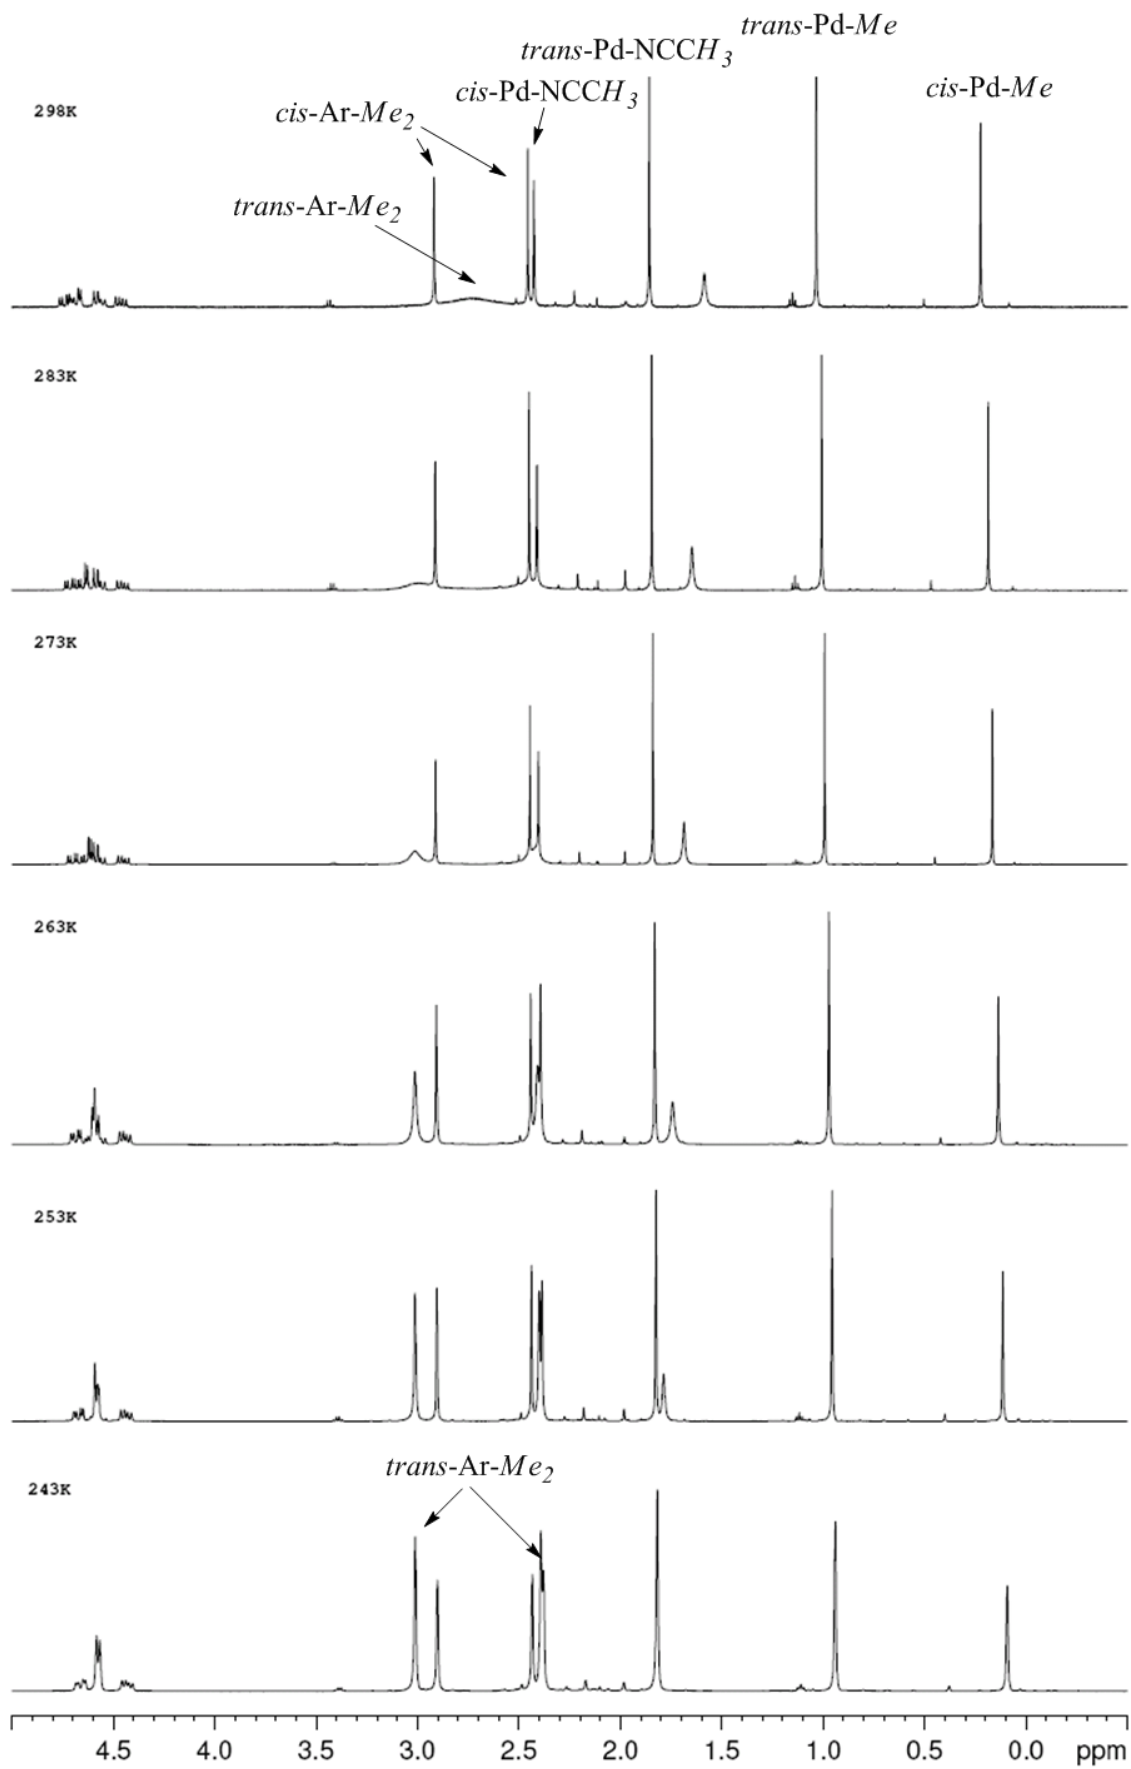

**Figure S7**  $^1\text{H}$  NMR spectra of **6a'** in  $\text{CD}_2\text{Cl}_2$  from 243 K to 298K

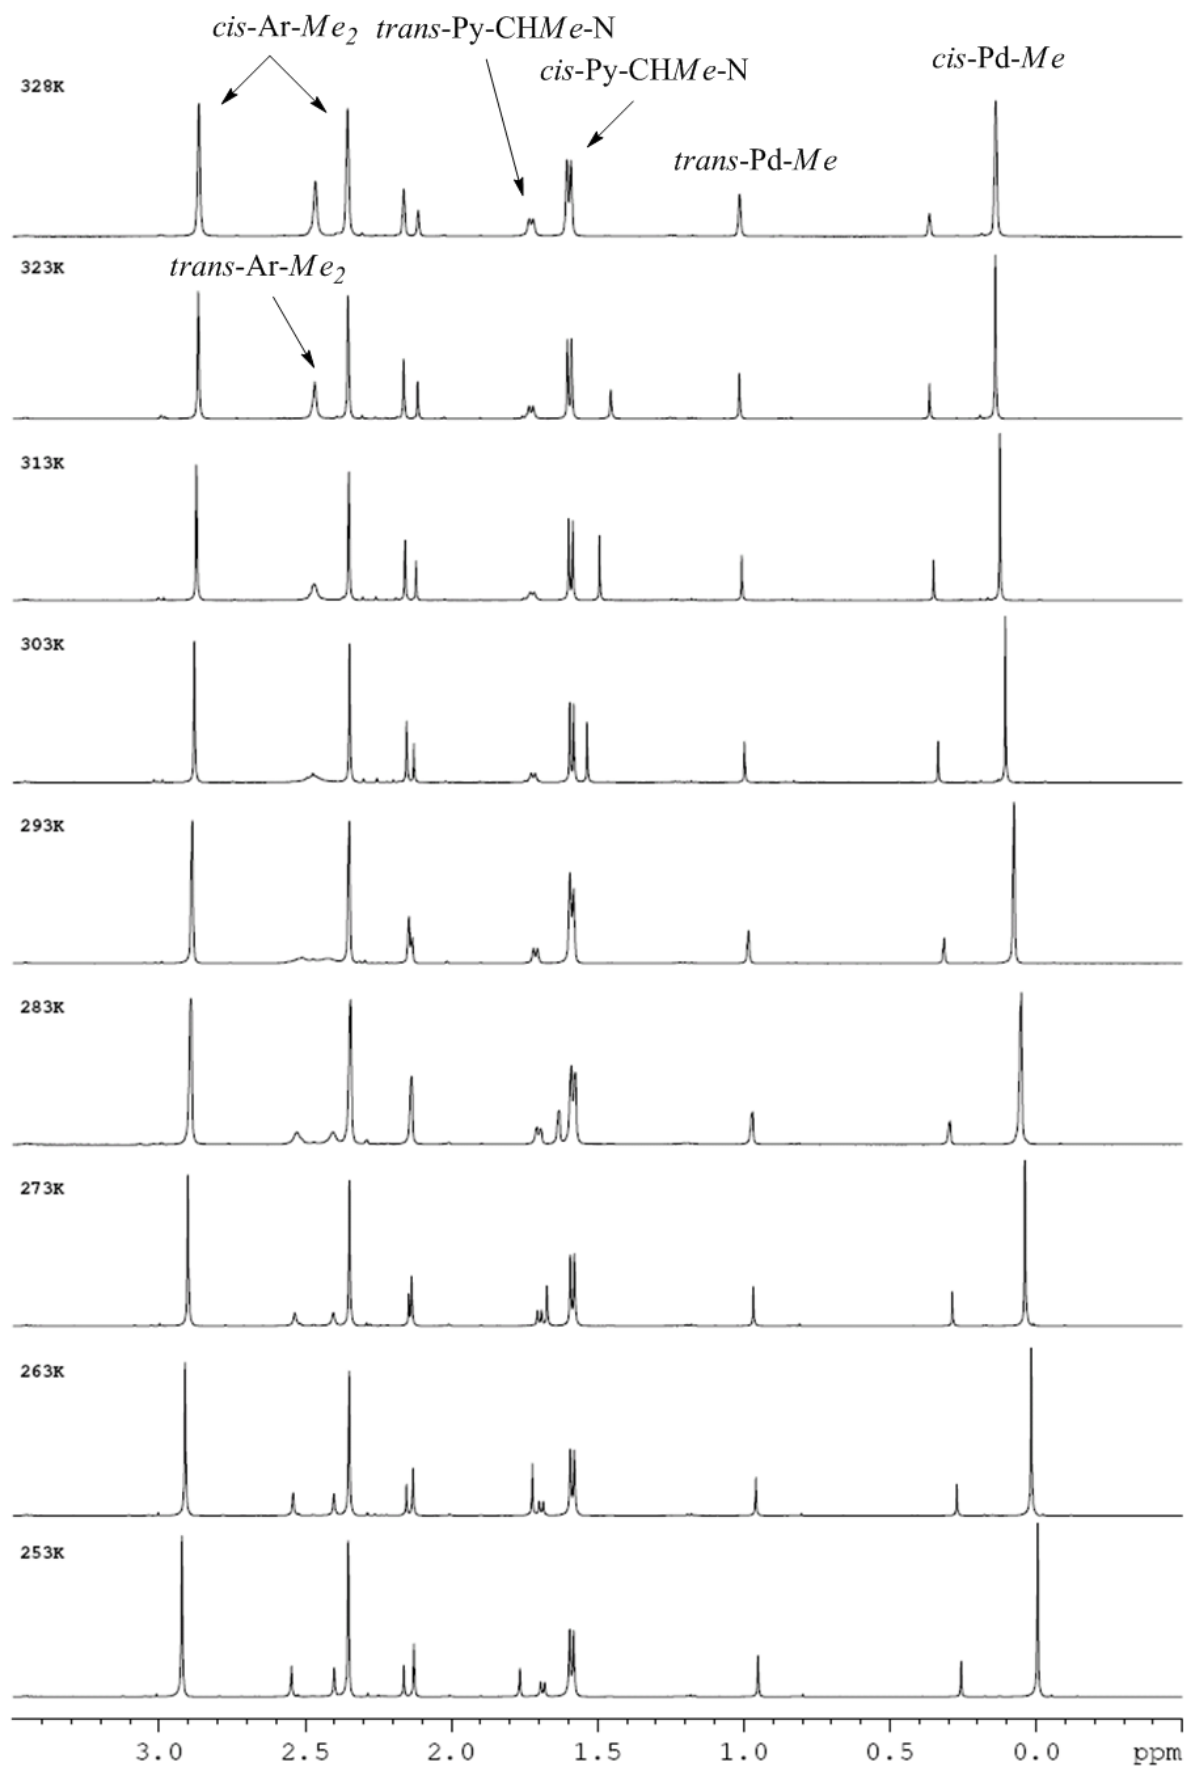



**Figure S8**  $^1\text{H}$  NMR spectra of **6b** in  $\text{CDCl}_3$  from 253 K to 328K

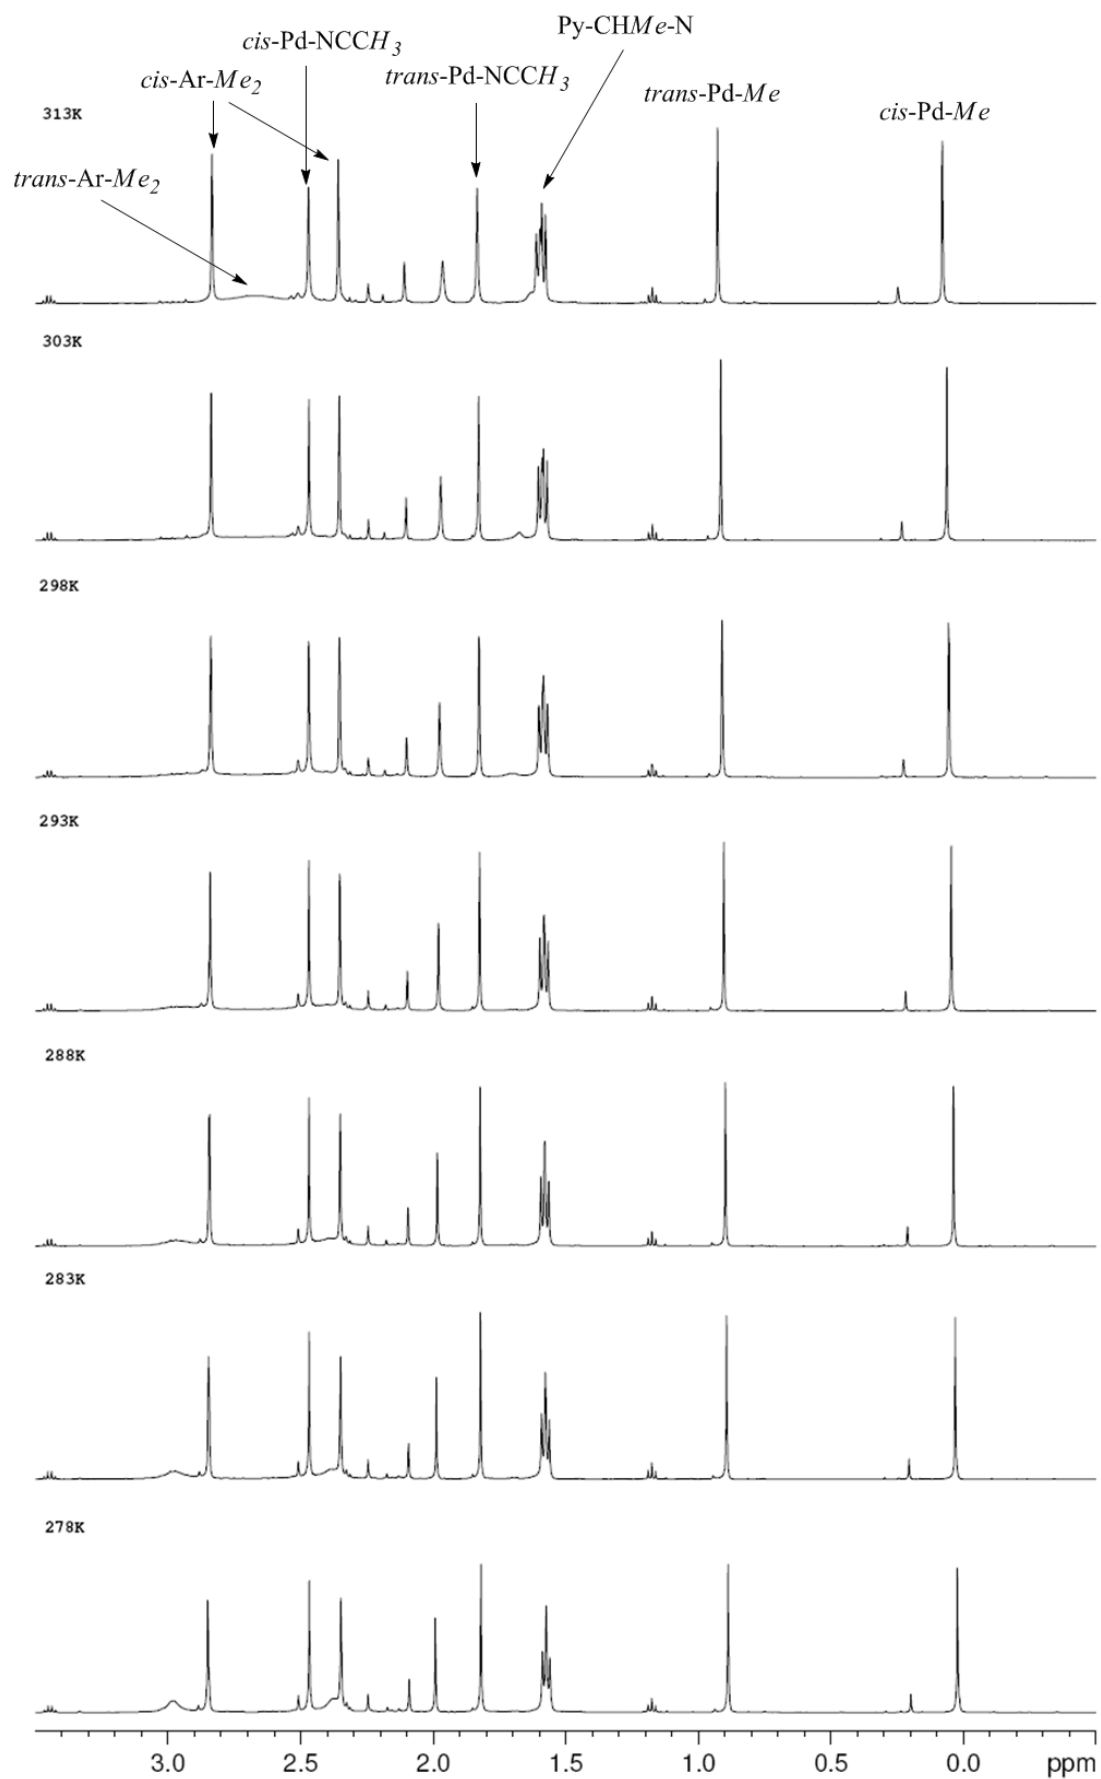

**Figure S9**  $^1\text{H}$  NMR spectra of **6b'** in  $\text{CD}_2\text{Cl}_2$  from 278 K to 313K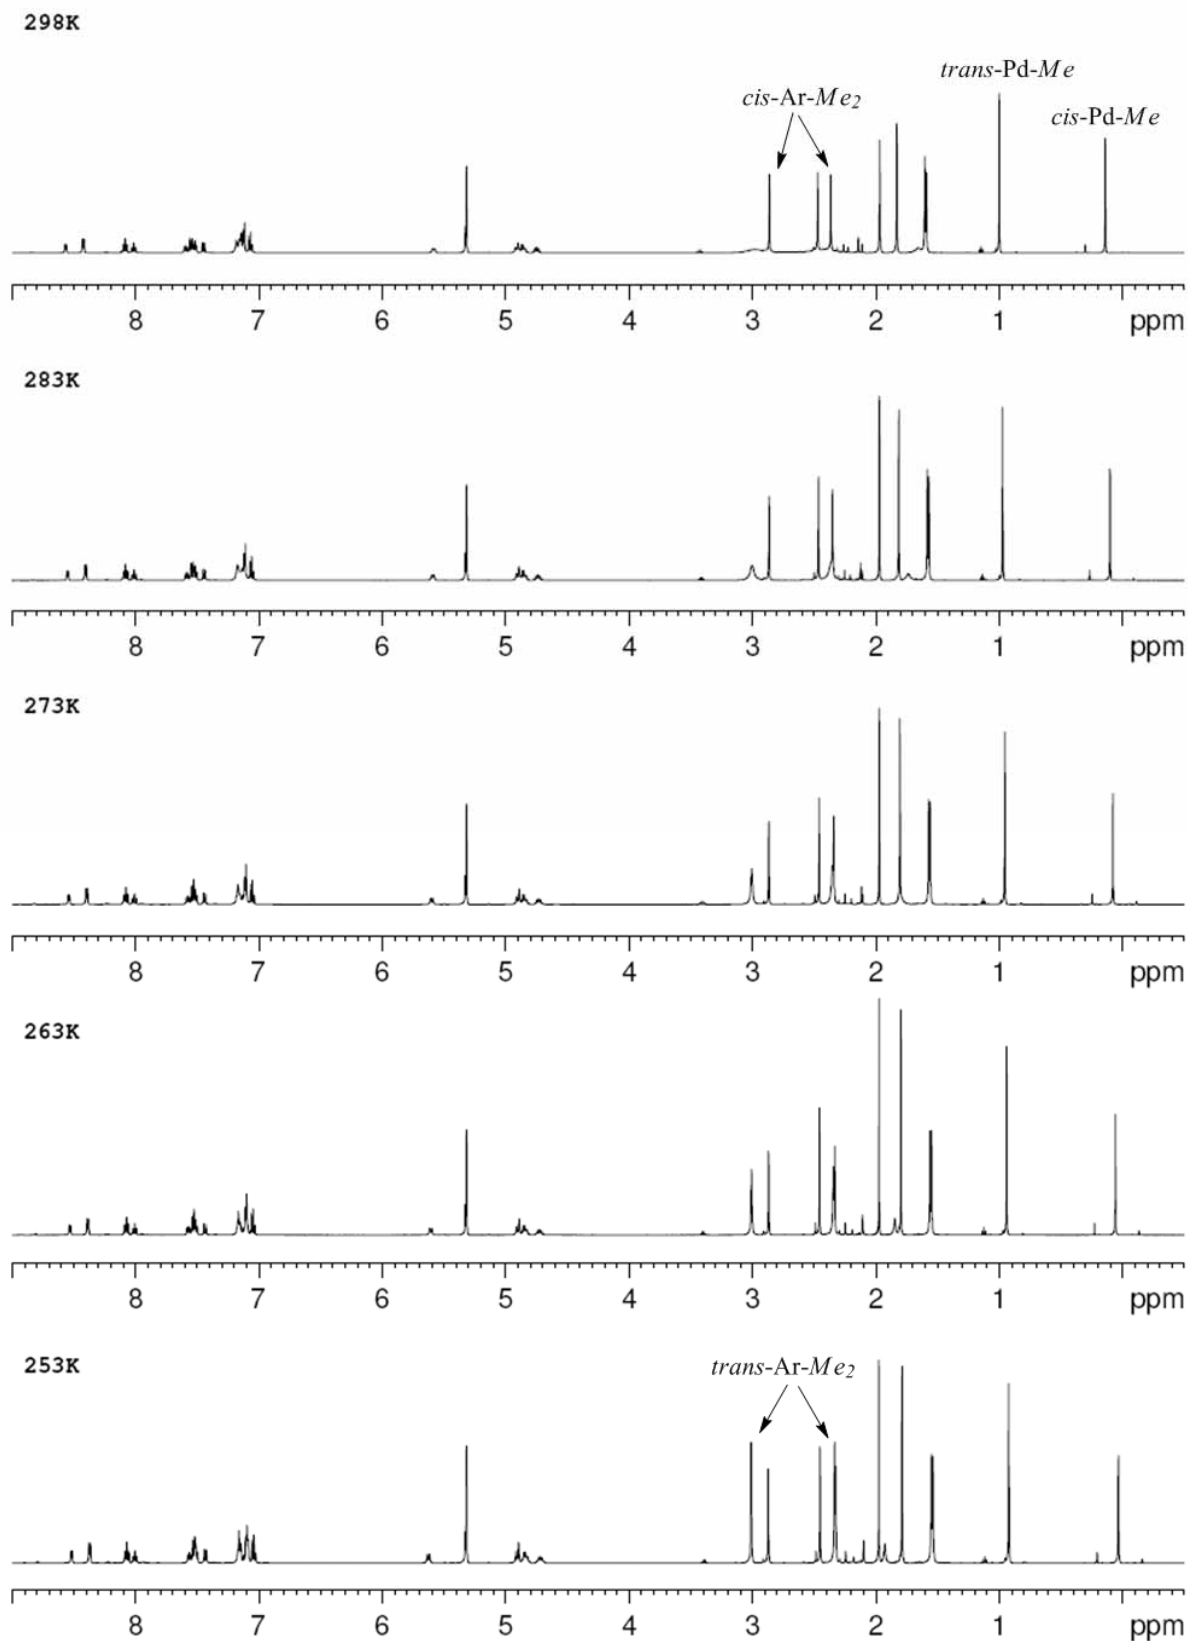

Figure S10 <sup>1</sup>H NMR spectra of **6b'** in CD<sub>2</sub>Cl<sub>2</sub> from 253 K to 298K

Table S5 X-ray crystal parameters and data collection

| Compound                                                 | <i>trans</i> - <b>4a</b>                            | <i>trans</i> - <b>5a</b>                            | <i>cis</i> - <b>6a</b>                              | <i>cis</i> - <b>4b</b>                                | <i>cis</i> - <b>6b</b>                              |
|----------------------------------------------------------|-----------------------------------------------------|-----------------------------------------------------|-----------------------------------------------------|-------------------------------------------------------|-----------------------------------------------------|
| Formula                                                  | C <sub>11</sub> H <sub>19</sub> ClN <sub>2</sub> Pd | C <sub>13</sub> H <sub>15</sub> ClN <sub>2</sub> Pd | C <sub>15</sub> H <sub>19</sub> ClN <sub>2</sub> Pd | C <sub>12</sub> H <sub>21</sub> ClN <sub>2</sub> Pd   | C <sub>16</sub> H <sub>21</sub> ClN <sub>2</sub> Pd |
| Formular wt                                              | 321.13                                              | 341.12                                              | 369.17                                              | 335.16                                                | 383.20                                              |
| Crystal size / mm                                        | 0.25×0.20×0.15                                      | 0.25×0.25×0.20                                      | 0.30×0.25×0.20                                      | 0.30×0.25×0.20                                        | 0.30×0.25×0.20                                      |
| Crystal system                                           | Monoclinic                                          | Triclinic                                           | Triclinic                                           | Orthorhombic                                          | Triclinic                                           |
| Space group                                              | <i>P</i> 2 <sub>1</sub> / <i>c</i>                  | <i>P</i> $\bar{1}$                                  | <i>P</i> $\bar{1}$                                  | <i>P</i> 2 <sub>1</sub> 2 <sub>1</sub> 2 <sub>1</sub> | <i>P</i> $\bar{1}$                                  |
| <i>a</i> / Å                                             | 9.1813(2)                                           | 8.2253(2)                                           | 8.4240(3)                                           | 9.1900(1)                                             | 8.3247(1)                                           |
| <i>b</i> / Å                                             | 7.0402(1)                                           | 9.1194(2)                                           | 9.6334(3)                                           | 10.1268(1)                                            | 9.6563(1)                                           |
| <i>c</i> / Å                                             | 20.5243(3)                                          | 10.6977(2)                                          | 10.8944(4)                                          | 15.3491(2)                                            | 10.8820(1)                                          |
| $\alpha$ / °                                             | 90                                                  | 93.887(1)                                           | 110.517(2)                                          | 90                                                    | 108.680(1)                                          |
| $\beta$ / °                                              | 95.1410(9)                                          | 110.902(1)                                          | 105.171(2)                                          | 90                                                    | 101.983(1)                                          |
| $\gamma$ / °                                             | 90                                                  | 113.454(1)                                          | 98.641(2)                                           | 90                                                    | 93.616(1)                                           |
| <i>V</i> / Å <sup>3</sup>                                | 1321.32(4)                                          | 666.77(3)                                           | 770.00(5)                                           | 1428.47(3)                                            | 802.66(2)                                           |
| <i>Z</i>                                                 | 4                                                   | 2                                                   | 2                                                   | 4                                                     | 2                                                   |
| $\rho_{\text{calcd}}$ / Mg m <sup>-3</sup>               | 1.614                                               | 1.699                                               | 1.592                                               | 1.558                                                 | 1.586                                               |
| <i>F</i> (000)                                           | 648                                                 | 340                                                 | 372                                                 | 680                                                   | 388                                                 |
| <i>T</i> / K                                             | 295(2)                                              | 295(2)                                              | 295(2)                                              | 295(2)                                                | 295(2)                                              |
| $\mu$ / mm <sup>-1</sup>                                 | 1.579                                               | 1.571                                               | 1.367                                               | 1.464                                                 | 1.314                                               |
| Transmission                                             | 0.732-0.792                                         | 0.654-0.731                                         | 0.520-0.767                                         | 0.732-0.804                                           | 0.651-0.773                                         |
| $\theta$ range / °                                       | 1.99~27.50                                          | 2.10~27.45                                          | 3.63~27.46                                          | 2.41~27.46                                            | 2.84~27.50                                          |
| <i>h, k, l</i>                                           | ±11, ±9, ±26                                        | ±10, ±11, ±13                                       | ±10, ±12, -13~14                                    | ±11, ±13, -16~19                                      | ±10, ±12, ±14                                       |
| Reflections collected                                    | 10638                                               | 5239                                                | 5884                                                | 9298                                                  | 6809                                                |
| Independent reflections                                  | 3021                                                | 3008                                                | 3469                                                | 3239                                                  | 3657                                                |
| <i>R</i> <sub>int</sub>                                  | 0.0270                                              | 0.0207                                              | 0.0463                                              | 0.0226                                                | 0.0183                                              |
| Data / restraints                                        | 3021/0                                              | 3008/0                                              | 3469/0                                              | 3239/0                                                | 3657/0                                              |
| Parameters                                               | 141                                                 | 159                                                 | 177                                                 | 146                                                   | 186                                                 |
| <i>R</i> <sub><i>I</i></sub> [ <i>I</i> >2σ( <i>I</i> )] | 0.0226                                              | 0.0278                                              | 0.0393                                              | 0.0156                                                | 0.0209                                              |
| <i>wR</i> <sub>2</sub> [ <i>I</i> >2σ( <i>I</i> )]       | 0.0517                                              | 0.0668                                              | 0.0970                                              | 0.0419                                                | 0.0603                                              |
| <i>R</i> <sub><i>I</i></sub> (all data)                  | 0.0293                                              | 0.0325                                              | 0.0484                                              | 0.0185                                                | 0.0219                                              |
| <i>wR</i> <sub>2</sub> (all data)                        | 0.0548                                              | 0.0697                                              | 0.1034                                              | 0.0466                                                | 0.0614                                              |
| Goodness of fit on <i>F</i> <sup>2</sup>                 | 1.049                                               | 1.038                                               | 1.010                                               | 1.094                                                 | 0.941                                               |
| Largest diff. peak and hole, eÅ <sup>-3</sup>            | 0.369 and -0.366                                    | 0.392 and -0.442                                    | 0.656 and -0.869                                    | 0.498 and -0.617                                      | 0.404 and -0.457                                    |

| Compound                                   | <i>cis</i> - <b>7b</b>                              | <i>cis</i> - <b>3a'</b>                                           | <i>trans</i> - <b>4a'</b>                                         | <i>trans</i> - <b>5a'</b>                                         | <i>trans</i> - <b>4b'</b>                                         |
|--------------------------------------------|-----------------------------------------------------|-------------------------------------------------------------------|-------------------------------------------------------------------|-------------------------------------------------------------------|-------------------------------------------------------------------|
| Formula                                    | C <sub>20</sub> H <sub>29</sub> ClN <sub>2</sub> Pd | C <sub>12</sub> H <sub>20</sub> BF <sub>4</sub> N <sub>3</sub> Pd | C <sub>13</sub> H <sub>22</sub> BF <sub>4</sub> N <sub>3</sub> Pd | C <sub>15</sub> H <sub>18</sub> BF <sub>4</sub> N <sub>3</sub> Pd | C <sub>14</sub> H <sub>24</sub> BF <sub>4</sub> N <sub>3</sub> Pd |
| Formular wt                                | 439.30                                              | 399.52                                                            | 413.55                                                            | 433.53                                                            | 427.57                                                            |
| Crystal size / mm                          | 0.20×0.20×0.15                                      | 0.25×0.20×0.10                                                    | 0.30×0.25×0.20                                                    | 0.25×0.20×0.20                                                    | 0.20×0.20×0.15                                                    |
| Crystal system                             | Monoclinic                                          | Triclinic                                                         | Monoclinic                                                        | Monoclinic                                                        | Monoclinic                                                        |
| Space group                                | <i>C</i> 2/ <i>c</i>                                | <i>P</i> $\bar{1}$                                                | <i>P</i> 2 <sub>1</sub> / <i>n</i>                                | <i>P</i> 2 <sub>1</sub> / <i>c</i>                                | <i>P</i> 2 <sub>1</sub> / <i>c</i>                                |
| <i>a</i> / Å                               | 24.5827(4)                                          | 7.5470(2)                                                         | 7.6329(1)                                                         | 9.9543(2)                                                         | 11.6589(2)                                                        |
| <i>b</i> / Å                               | 9.6041(2)                                           | 11.2769(2)                                                        | 12.1420(3)                                                        | 9.4463(2)                                                         | 7.3818(2)                                                         |
| <i>c</i> / Å                               | 17.4202(3)                                          | 11.2845(2)                                                        | 20.1943(5)                                                        | 18.9653(3)                                                        | 22.3551(6)                                                        |
| $\alpha$ / °                               | 90                                                  | 62.790(1)                                                         | 90                                                                | 90                                                                | 90                                                                |
| $\beta$ / °                                | 93.369(1)                                           | 78.055(1)                                                         | 99.206(1)                                                         | 102.237(1)                                                        | 100.554(1)                                                        |
| $\gamma$ / °                               | 90                                                  | 78.412(1)                                                         | 90                                                                | 90                                                                | 90                                                                |
| <i>V</i> / Å <sup>3</sup>                  | 4105.7(1)                                           | 829.36(3)                                                         | 1847.47(7)                                                        | 1742.81(6)                                                        | 1891.41(8)                                                        |
| <i>Z</i>                                   | 8                                                   | 2                                                                 | 4                                                                 | 4                                                                 | 4                                                                 |
| $\rho_{\text{calcd}}$ / Mg m <sup>-3</sup> | 1.421                                               | 1.600                                                             | 1.487                                                             | 1.652                                                             | 1.502                                                             |
| <i>F</i> (000)                             | 1808                                                | 400                                                               | 832                                                               | 864                                                               | 864                                                               |
| <i>T</i> / K                               | 295(2)                                              | 295(2)                                                            | 295(2)                                                            | 295(2)                                                            | 295(2)                                                            |
| $\mu$ / mm <sup>-1</sup>                   | 1.038                                               | 1.153                                                             | 1.038                                                             | 1.105                                                             | 1.017                                                             |
| Transmission                               | 0.821-0.857                                         | 0.722-0.892                                                       | 0.723-0.812                                                       | 0.720-0.784                                                       | 0.795-0.864                                                       |
| $\theta$ range / °                         | 1.66~27.48                                          | 2.05~27.44                                                        | 1.96~27.47                                                        | 2.09~27.47                                                        | 1.78~27.47                                                        |
| <i>h, k, l</i>                             | ±31, ±12, -21~22                                    | ±9, -13~14, ±14                                                   | ±9, ±15, ±26                                                      | ±12, ±12, -22~24                                                  | ±15, ±9, -28~29                                                   |
| Reflections collected                      | 12879                                               | 6276                                                              | 10140                                                             | 10796                                                             | 13190                                                             |
| Independent reflections                    | 4667                                                | 3711                                                              | 4044                                                              | 3966                                                              | 4270                                                              |
| <i>R</i> <sub>int</sub>                    | 0.0273                                              | 0.0289                                                            | 0.0249                                                            | 0.0285                                                            | 0.0411                                                            |
| Data / restraints                          | 4667/0                                              | 3711/0                                                            | 4404/0                                                            | 3966/0                                                            | 4270/0                                                            |

This journal is © The Royal Society of Chemistry 2009

|                                                 |                  |                  |                  |                  |                  |
|-------------------------------------------------|------------------|------------------|------------------|------------------|------------------|
| Parameters                                      | 222              | 191              | 204              | 222              | 209              |
| $R_1$ [ $I > 2\sigma(I)$ ]                      | 0.0313           | 0.0605           | 0.0456           | 0.0299           | 0.0553           |
| $wR_2$ [ $I > 2\sigma(I)$ ]                     | 0.0715           | 0.1658           | 0.1305           | 0.0646           | 0.1530           |
| $R_1$ (all data)                                | 0.0506           | 0.0702           | 0.0556           | 0.0478           | 0.0841           |
| $wR_2$ (all data)                               | 0.0798           | 0.1804           | 0.1441           | 0.0724           | 0.1829           |
| Goodness of fit on $F^2$                        | 1.019            | 1.123            | 1.101            | 1.028            | 1.054            |
| Largest diff. peak and hole, $e\text{\AA}^{-3}$ | 0.493 and -0.491 | 1.115 and -0.677 | 1.287 and -0.804 | 0.574 and -0.461 | 0.995 and -0.562 |

**Table S6** Selected bond distances (Å) and angles (°)

| <b>[<sup>1</sup>BuHNCH<sub>2</sub>(<i>o</i>-C<sub>6</sub>H<sub>5</sub>N)]Pd(Me)Cl (<i>trans</i>-<b>4a</b>)</b>                                 |           |           |           |          |           |          |            |
|------------------------------------------------------------------------------------------------------------------------------------------------|-----------|-----------|-----------|----------|-----------|----------|------------|
| Pd-N1                                                                                                                                          | 2.038 (2) | Pd-N2     | 2.202 (2) | Pd-C1    | 2.032 (2) | Pd-Cl1   | 2.3150 (6) |
| N1-C6                                                                                                                                          | 1.348 (3) | N2-C7     | 1.470 (3) | C6-C7    | 1.503 (3) | N2-C8    | 1.510 (3)  |
| N1-Pd-N2                                                                                                                                       | 80.52 (7) | C1-Pd-Cl1 | 88.37 (8) | Pd-N1-C6 | 114.3 (1) | Pd-N2-C7 | 101.8 (1)  |
| N1-C6-C7                                                                                                                                       | 115.8 (2) | N2-C7-C6  | 111.8 (2) | C8-N2-Pd | 123.5 (1) | C8-N2-C7 | 115.6 (2)  |
| <b>[PhHNCH<sub>2</sub>(<i>o</i>-C<sub>6</sub>H<sub>5</sub>N)]Pd(Me)Cl (<i>trans</i>-<b>5a</b>)</b>                                             |           |           |           |          |           |          |            |
| Pd-N1                                                                                                                                          | 2.055 (2) | Pd-N2     | 2.212 (2) | Pd-C1    | 2.015 (3) | Pd-Cl1   | 2.3065 (7) |
| N1-C6                                                                                                                                          | 1.349 (4) | N2-C7     | 1.468 (4) | C6-C7    | 1.510 (4) | N2-C8    | 1.438 (4)  |
| N1-Pd-N2                                                                                                                                       | 80.56 (9) | C1-Pd-Cl1 | 88.57 (9) | Pd-N1-C6 | 114.1 (2) | Pd-N2-C7 | 103.0 (2)  |
| N1-C6-C7                                                                                                                                       | 116.8 (2) | N2-C7-C6  | 112.2 (2) | C8-N2-Pd | 111.1 (2) | C8-N2-C7 | 117.6 (2)  |
| <b>[(2,6-Me<sub>2</sub>C<sub>6</sub>H<sub>3</sub>)HNCH<sub>2</sub>(<i>o</i>-C<sub>6</sub>H<sub>5</sub>N)]Pd(Me)Cl (<i>cis</i>-<b>6a</b>)</b>   |           |           |           |          |           |          |            |
| Pd-N1                                                                                                                                          | 2.138 (3) | Pd-N2     | 2.109 (3) | Pd-C1    | 2.021 (4) | Pd-Cl1   | 2.3152 (9) |
| N1-C6                                                                                                                                          | 1.340 (5) | N2-C7     | 1.490 (5) | C6-C7    | 1.504 (5) | N2-C8    | 1.455 (5)  |
| N1-Pd-N2                                                                                                                                       | 81.0 (1)  | C1-Pd-Cl1 | 88.7 (1)  | Pd-N1-C6 | 114.3 (2) | Pd-N2-C7 | 111.8 (2)  |
| N1-C6-C7                                                                                                                                       | 118.2 (3) | N2-C7-C6  | 114.2 (3) | C8-N2-Pd | 117.5 (3) | C8-N2-C7 | 113.7 (3)  |
| <b>[<sup>1</sup>BuHNCMeH(<i>o</i>-C<sub>6</sub>H<sub>5</sub>N)]Pd(Me)Cl (<i>cis</i>-<b>4b</b>)</b>                                             |           |           |           |          |           |          |            |
| Pd-N1                                                                                                                                          | 2.143 (2) | Pd-N2     | 2.105 (2) | Pd-C1    | 2.021 (2) | Pd-Cl1   | 2.3172 (5) |
| N1-C6                                                                                                                                          | 1.335 (3) | N2-C7     | 1.492 (2) | C6-C7    | 1.511 (3) | N2-C9    | 1.527 (3)  |
| N1-Pd-N2                                                                                                                                       | 79.75 (7) | C1-Pd-Cl1 | 90.21 (7) | Pd-N1-C6 | 111.7 (1) | Pd-N2-C7 | 103.8 (1)  |
| N1-C6-C7                                                                                                                                       | 115.7 (2) | N2-C7-C6  | 110.2 (2) | C9-N2-Pd | 116.4 (1) | C9-N2-C7 | 116.0 (2)  |
| <b>[(2,6-Me<sub>2</sub>C<sub>6</sub>H<sub>3</sub>)HNCMeH(<i>o</i>-C<sub>6</sub>H<sub>5</sub>N)]Pd(Me)Cl (<i>cis</i>-<b>6b</b>)</b>             |           |           |           |          |           |          |            |
| Pd-N1                                                                                                                                          | 2.132 (2) | Pd-N2     | 2.101 (2) | Pd-C1    | 2.034 (2) | Pd-Cl1   | 2.3140 (5) |
| N1-C6                                                                                                                                          | 1.341 (3) | N2-C7     | 1.503 (3) | C6-C7    | 1.512 (3) | N2-C9    | 1.457 (2)  |
| N1-Pd-N2                                                                                                                                       | 80.62 (6) | C1-Pd-Cl1 | 89.04 (7) | Pd-N1-C6 | 114.6 (1) | Pd-N2-C7 | 112.3 (1)  |
| N1-C6-C7                                                                                                                                       | 117.7 (2) | N2-C7-C6  | 111.9 (2) | C9-N2-Pd | 117.6 (1) | C9-N2-C7 | 111.7 (2)  |
| <b>[(2,6-<sup>1</sup>Pr<sub>2</sub>C<sub>6</sub>H<sub>3</sub>)HNCMeH(<i>o</i>-C<sub>6</sub>H<sub>5</sub>N)]Pd(Me)Cl (<i>cis</i>-<b>7b</b>)</b> |           |           |           |          |           |          |            |
| Pd-N1                                                                                                                                          | 2.115 (2) | Pd-N2     | 2.098 (2) | Pd-C1    | 2.075 (2) | Pd-Cl1   | 2.3124 (7) |
| N1-C6                                                                                                                                          | 1.346 (3) | N2-C7     | 1.511 (3) | C6-C7    | 1.519 (3) | N2-C9    | 1.462 (3)  |
| N1-Pd-N2                                                                                                                                       | 80.77 (8) | C1-Pd-Cl1 | 89.23 (7) | Pd-N1-C6 | 115.5 (2) | Pd-N2-C7 | 113.0 (2)  |
| N1-C6-C7                                                                                                                                       | 117.8 (2) | N2-C7-C6  | 111.8 (2) | C9-N2-Pd | 116.7 (2) | C9-N2-C7 | 113.0 (2)  |
| <b>{[<sup>1</sup>PrHNCH<sub>2</sub>(<i>o</i>-C<sub>6</sub>H<sub>5</sub>N)]Pd(Me)(NCMe)}(BF<sub>4</sub>) (<i>cis</i>-<b>3a'</b>)</b>            |           |           |           |          |           |          |            |
| Pd-N1                                                                                                                                          | 2.125 (4) | Pd-N2     | 2.042 (4) | Pd-C1    | 2.031 (6) | Pd-N3    | 2.008 (5)  |
| N1-C6                                                                                                                                          | 1.326 (7) | N2-C7     | 1.470 (8) | C6-C7    | 1.517 (7) | N2-C8    | 1.548 (8)  |
| N1-Pd-N2                                                                                                                                       | 81.7 (2)  | C1-Pd-N3  | 89.9 (3)  | Pd-N1-C6 | 112.7 (3) | Pd-N2-C7 | 109.0 (3)  |
| N1-C6-C7                                                                                                                                       | 116.1 (4) | N2-C7-C6  | 112.8 (4) | C8-N2-Pd | 109.7 (4) | C8-N2-C7 | 118.0 (5)  |
| <b>{[<sup>1</sup>BuHNCH<sub>2</sub>(<i>o</i>-C<sub>6</sub>H<sub>5</sub>N)]Pd(Me)(NCMe)}(BF<sub>4</sub>) (<i>trans</i>-<b>4a'</b>)</b>          |           |           |           |          |           |          |            |
| Pd-N1                                                                                                                                          | 2.034 (3) | Pd-N2     | 2.201 (3) | Pd-C1    | 2.022 (4) | Pd-N3    | 1.994 (4)  |
| N1-C6                                                                                                                                          | 1.368 (5) | N2-C7     | 1.500 (5) | C6-C7    | 1.506 (6) | N2-C8    | 1.542 (6)  |
| N1-Pd-N2                                                                                                                                       | 81.1 (1)  | C1-Pd-N3  | 87.9 (2)  | Pd-N1-C6 | 114.6 (2) | Pd-N2-C7 | 103.8 (2)  |
| N1-C6-C7                                                                                                                                       | 117.1 (3) | N2-C7-C6  | 111.5 (3) | C8-N2-Pd | 116.2 (3) | C8-N2-C7 | 117.5 (3)  |
| <b>{[PhHNCH<sub>2</sub>(<i>o</i>-C<sub>6</sub>H<sub>5</sub>N)]Pd(Me)(NCMe)}(BF<sub>4</sub>) (<i>trans</i>-<b>5a'</b>)</b>                      |           |           |           |          |           |          |            |
| Pd-N1                                                                                                                                          | 2.024 (2) | Pd-N2     | 2.185 (2) | Pd-C1    | 2.007 (3) | Pd-N3    | 1.993 (2)  |
| N1-C6                                                                                                                                          | 1.355 (3) | N2-C7     | 1.470 (3) | C6-C7    | 1.495 (4) | N2-C8    | 1.434 (3)  |
| N1-Pd-N2                                                                                                                                       | 80.80 (9) | C1-Pd-N3  | 88.3 (1)  | Pd-N1-C6 | 114.6 (2) | Pd-N2-C7 | 104.2 (2)  |
| N1-C6-C7                                                                                                                                       | 116.9 (2) | N2-C7-C6  | 112.2 (2) | C8-N2-Pd | 110.9 (2) | C8-N2-C7 | 117.2 (2)  |
| <b>{[<sup>1</sup>BuHNCMeH(<i>o</i>-C<sub>6</sub>H<sub>5</sub>N)]Pd(Me)(NCMe)}(BF<sub>4</sub>) (<i>trans</i>-<b>4b'</b>)</b>                    |           |           |           |          |           |          |            |
| Pd-N1                                                                                                                                          | 2.032 (4) | Pd-N2     | 2.184 (4) | Pd-C1    | 2.020 (6) | Pd-N3    | 1.996 (5)  |
| N1-C6                                                                                                                                          | 1.332 (6) | N2-C7     | 1.487 (6) | C6-C7    | 1.524 (7) | N2-C9    | 1.513 (7)  |
| N1-Pd-N2                                                                                                                                       | 80.5 (2)  | C1-Pd-N3  | 88.3 (2)  | Pd-N1-C6 | 113.7 (3) | Pd-N2-C7 | 102.6 (3)  |
| N1-C6-C7                                                                                                                                       | 117.6 (4) | N2-C7-C6  | 109.5 (4) | C9-N2-Pd | 118.8 (3) | C9-N2-C7 | 115.9 (4)  |

**Figure S11** ORTEP drawing of *trans-4a*, all hydrogen atoms are omitted for clarity.

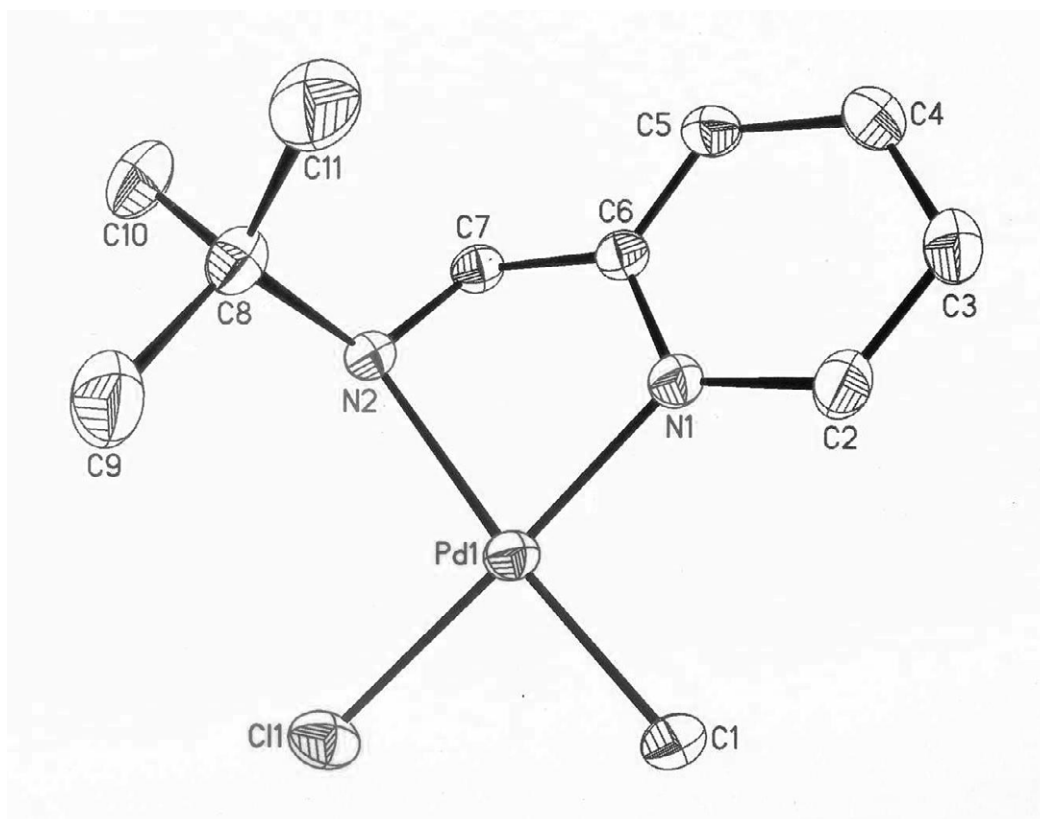

**Figure S12** ORTEP drawing of *trans-5a*, all hydrogen atoms are omitted for clarity.

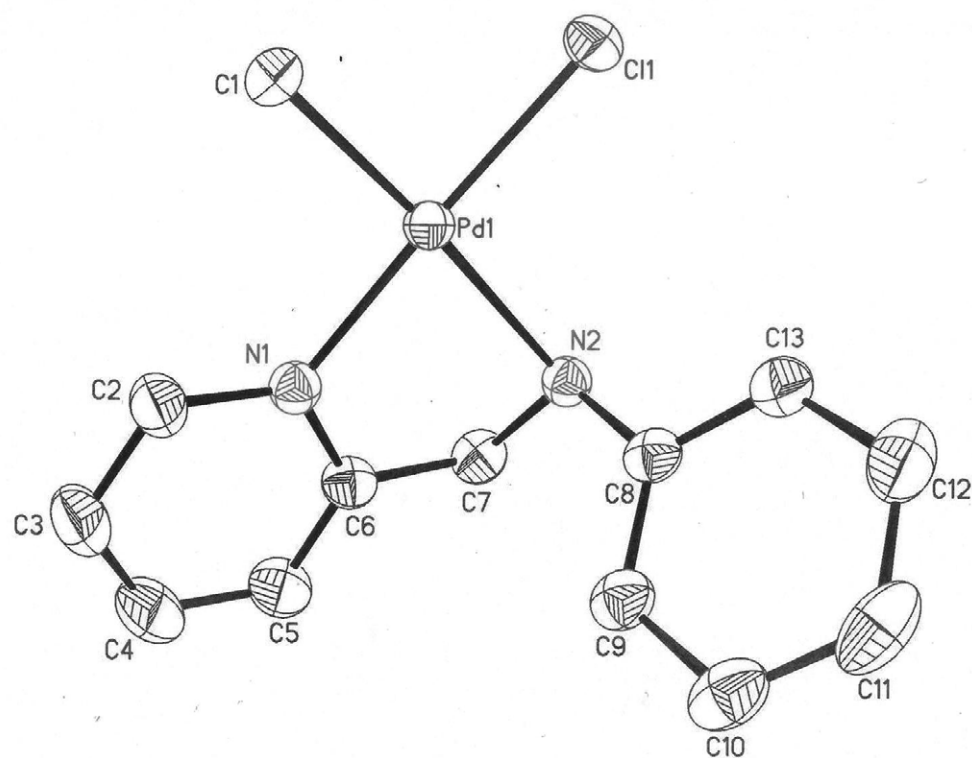

**Figure S13** ORTEP drawing of *cis-6a*, all hydrogen atoms are omitted for clarity.

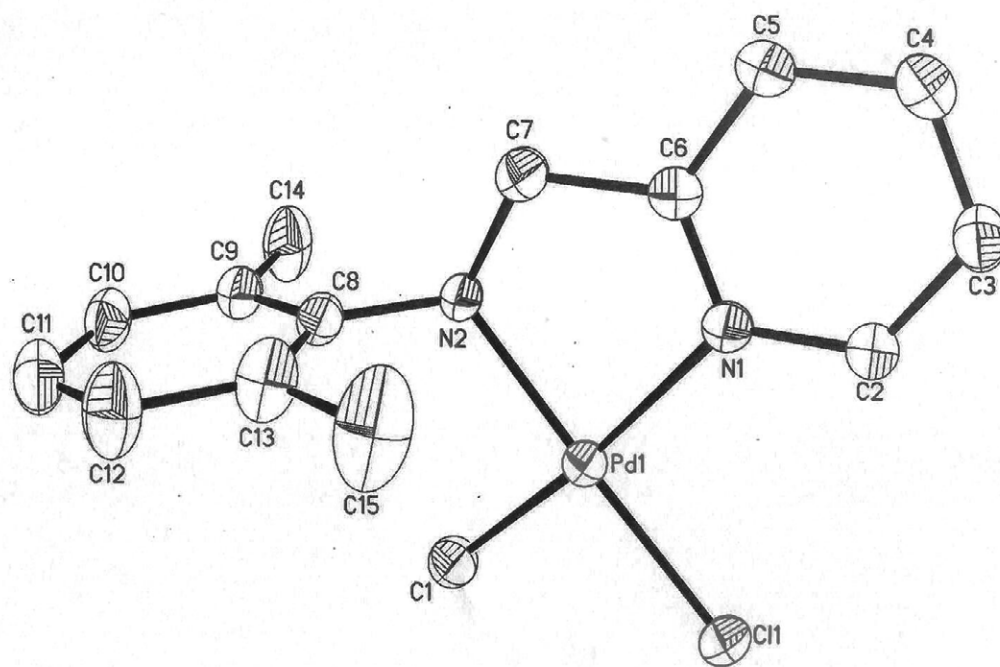

**Figure S14** ORTEP drawing of *cis-4b*, all hydrogen atoms are omitted for clarity.

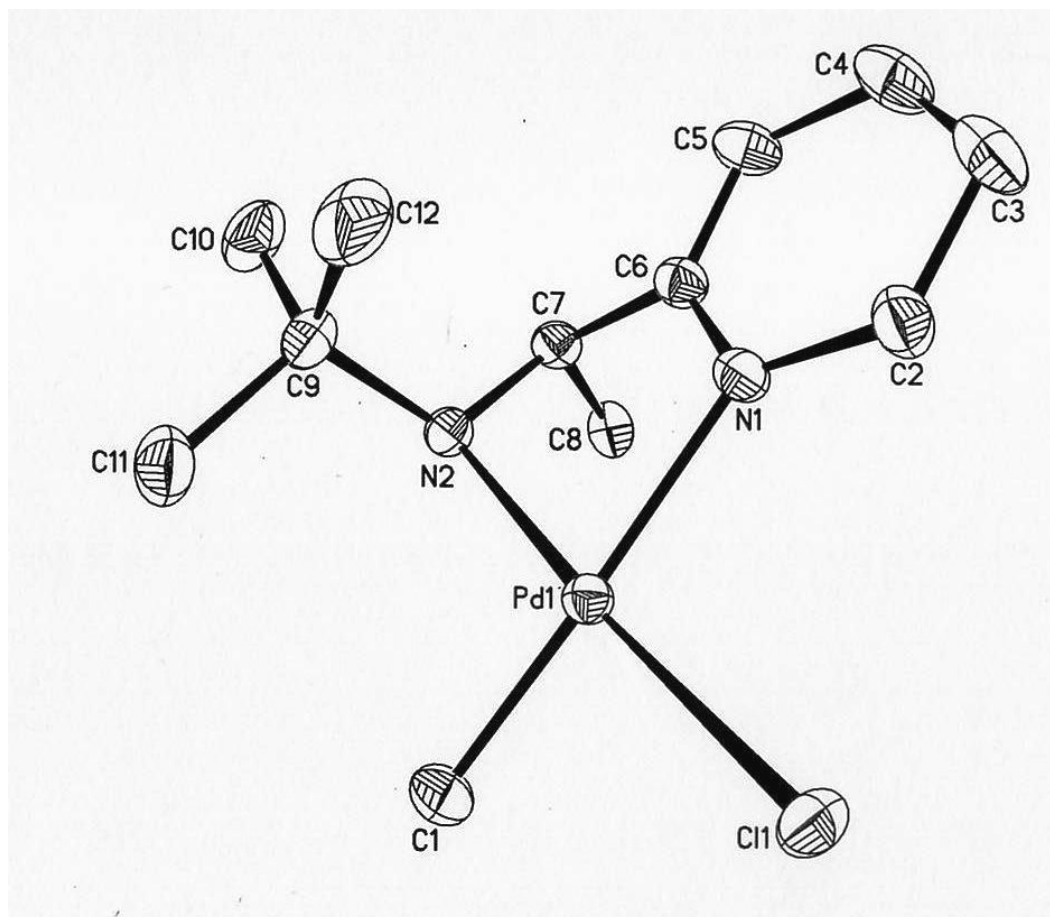

**Figure S15** ORTEP drawing of *cis*-**6b**, all hydrogen atoms are omitted for clarity.

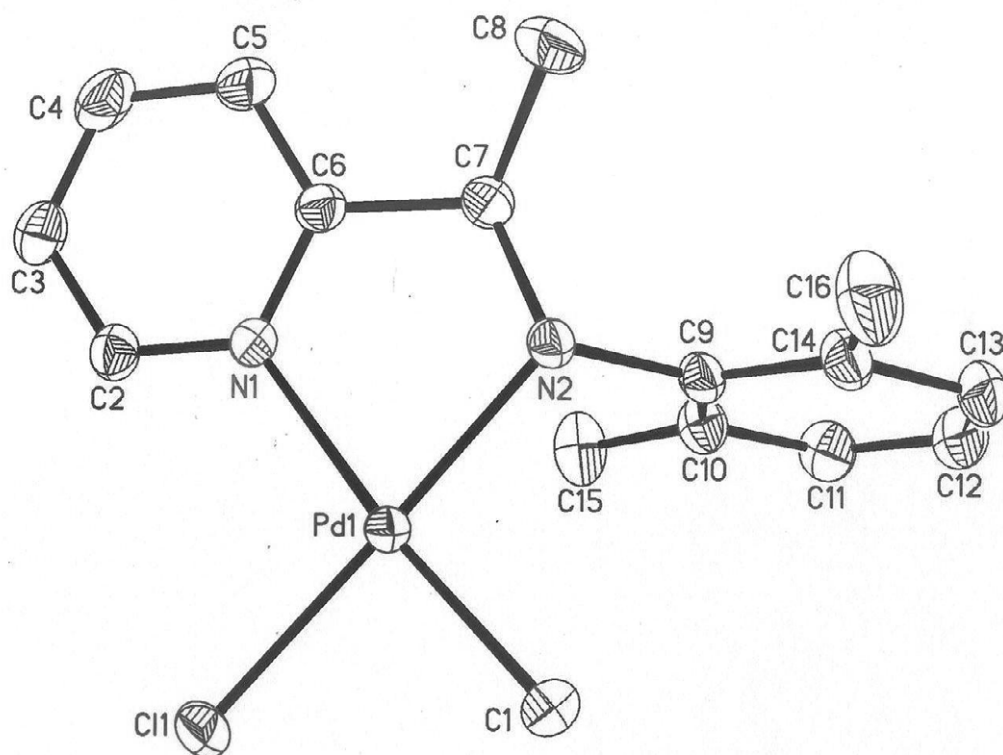



**Figure S16** ORTEP drawing of *cis-7b*, all hydrogen atoms are omitted for clarity.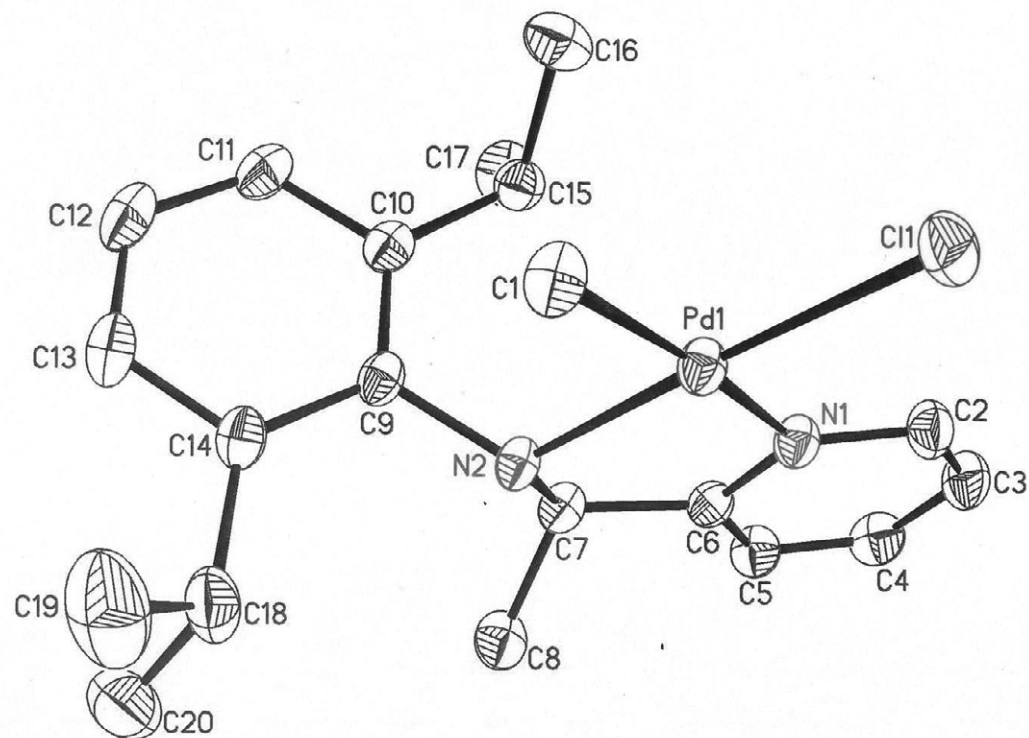**Figure S17** ORTEP drawing of *cis-3a'*, all hydrogen atoms are omitted for clarity.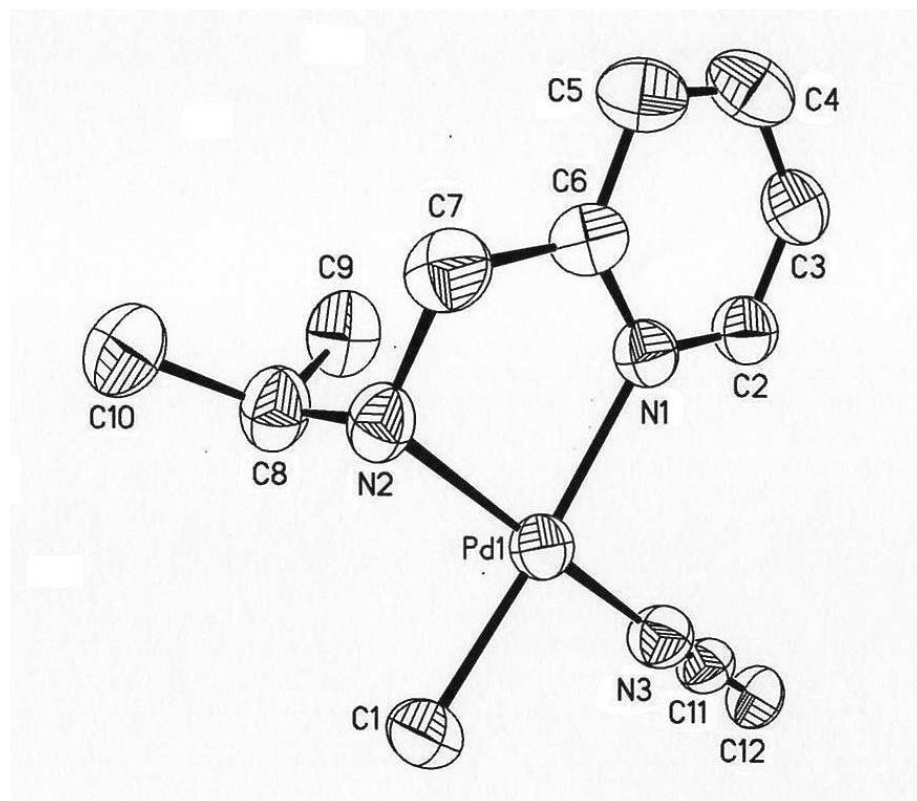

**Figure S18** ORTEP drawing of *trans-4a'*, all hydrogen atoms are omitted for clarity.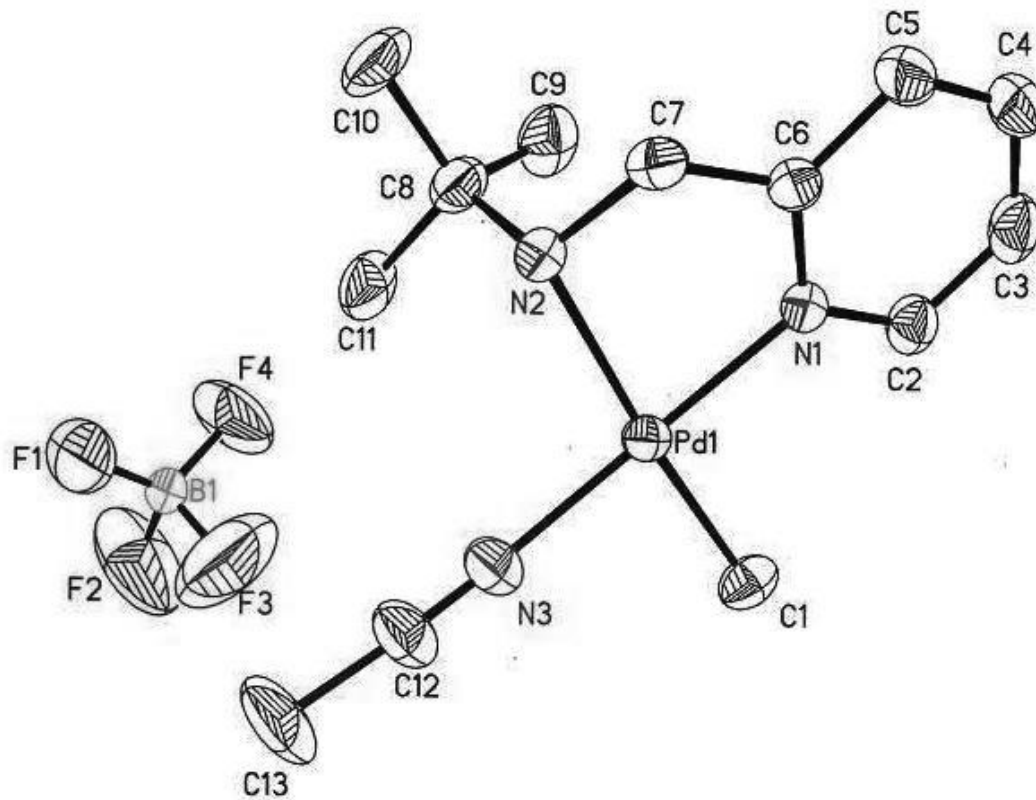**Figure S19** ORTEP drawing of *trans-5a'*, all hydrogen atoms are omitted for clarity.

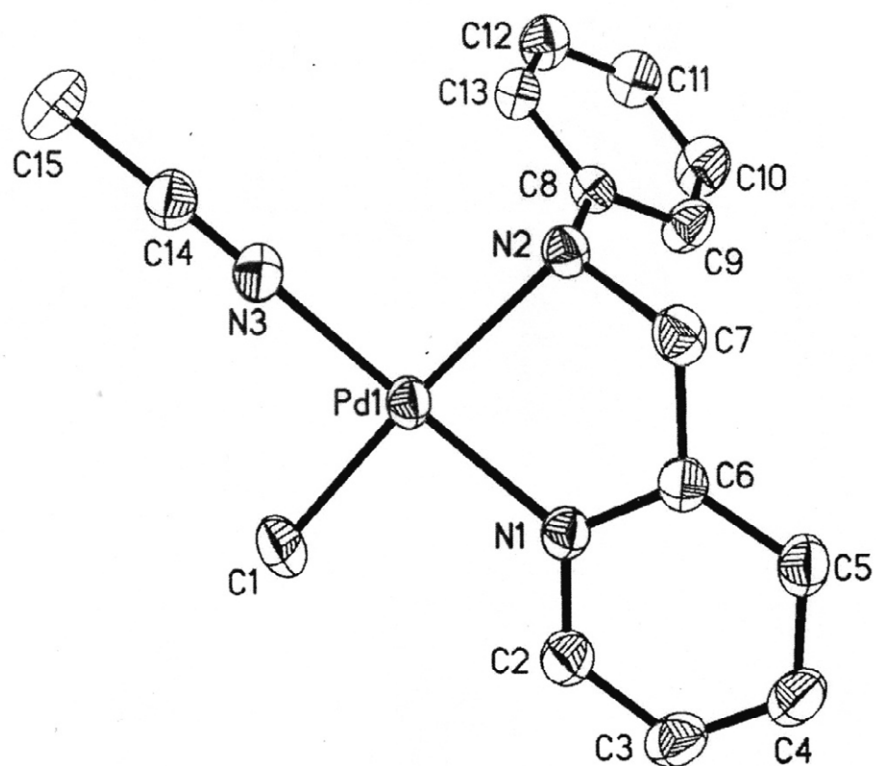

**Figure S20** ORTEP drawing of *trans-4b'*, all hydrogen atoms are omitted for clarity.

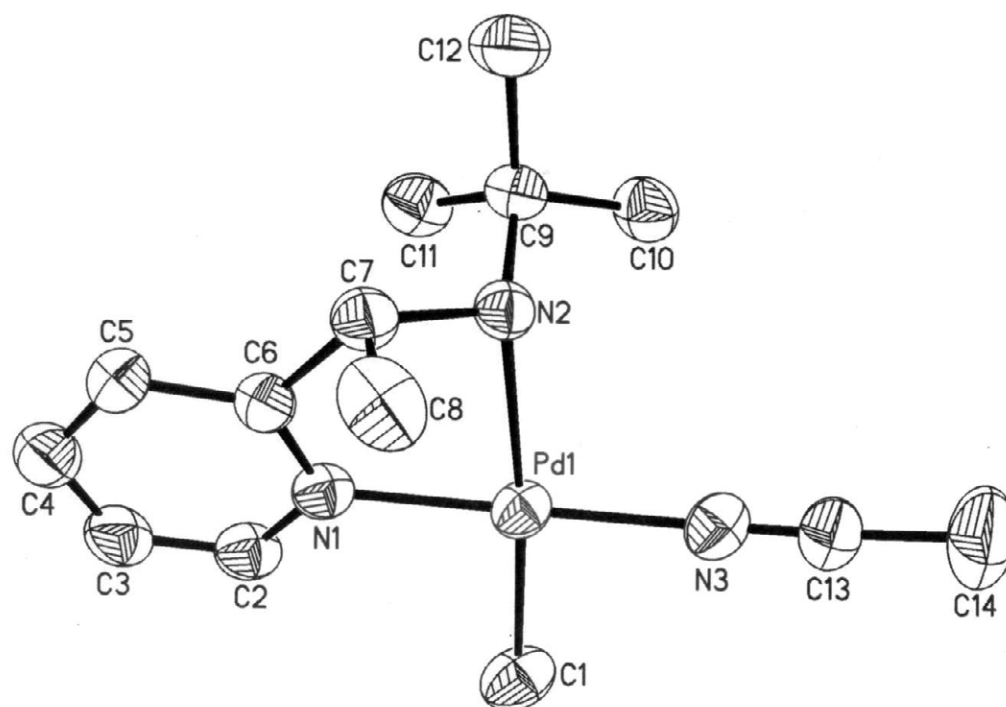

**Figure S21** 2D-NOSEY spectrum for **3b** in  $\text{CDCl}_3$ 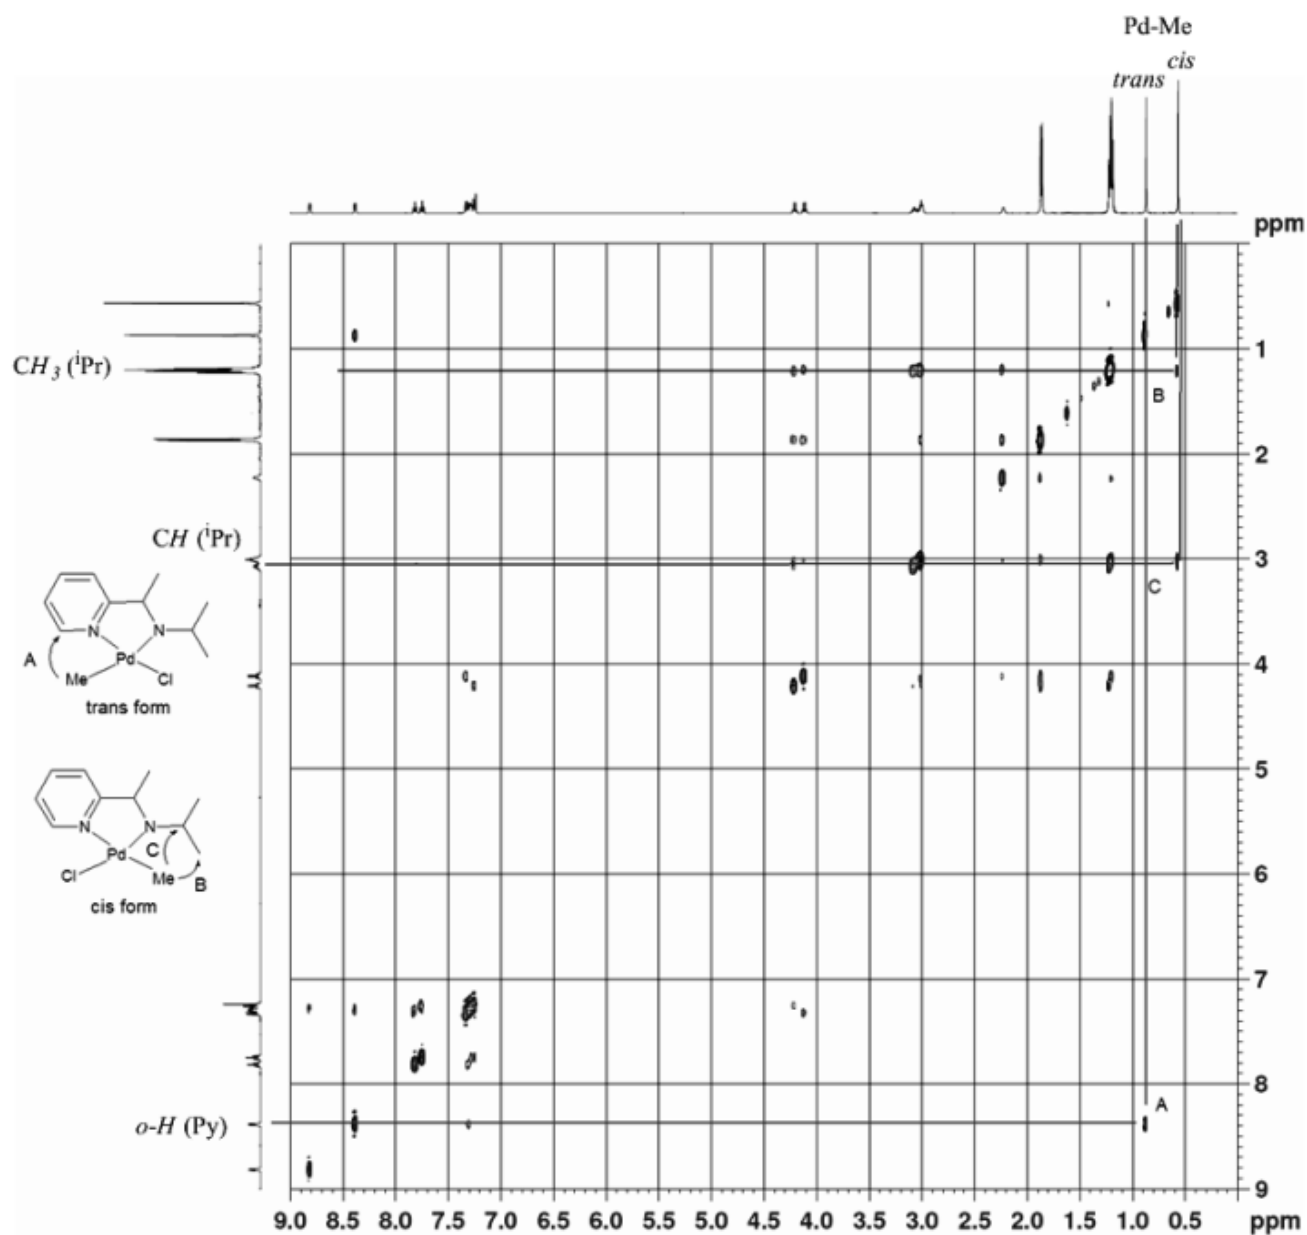

**Figure S22** Comparative  $^1\text{H}$  NMR spectrum of norbornene insertion into **3b'** in the regions of (a) 8.7 ~ 7 ppm and (b) 4.6 ~ 0 ppm.

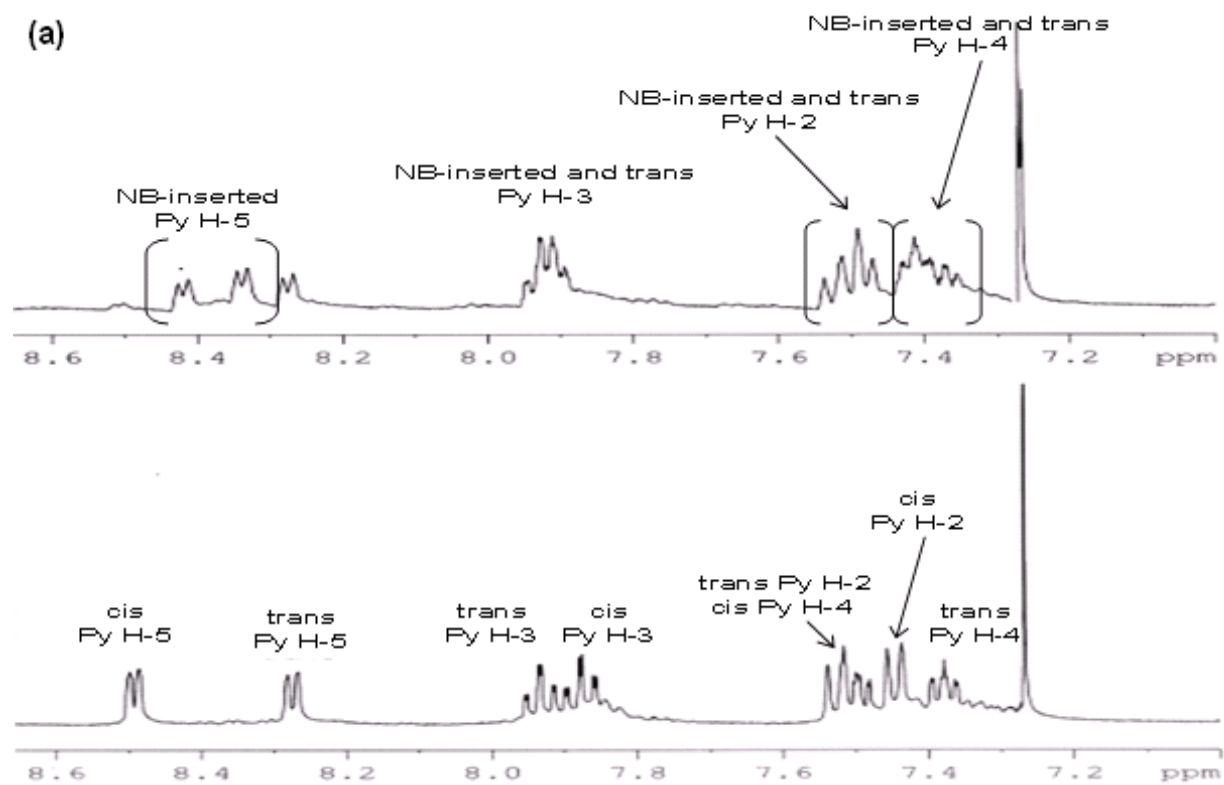

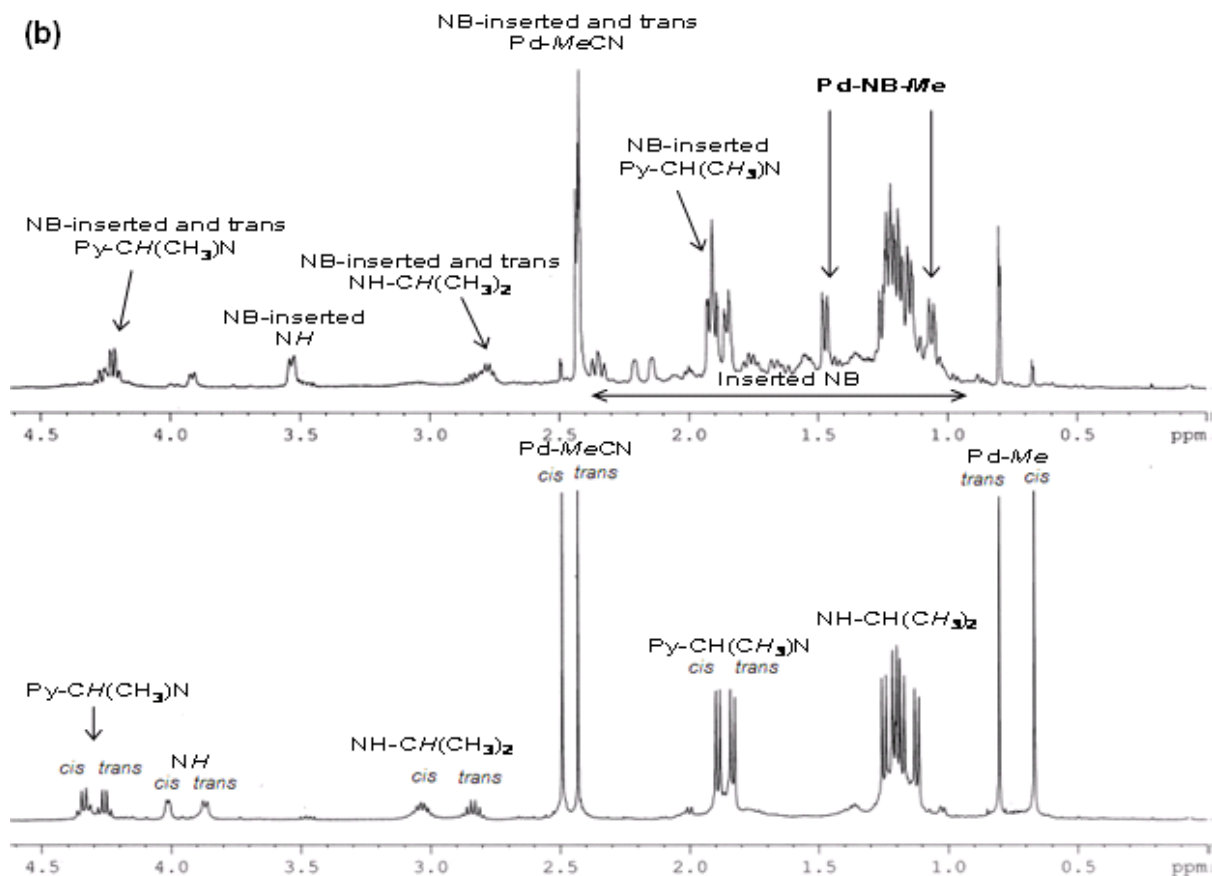

## References:

1. J. Kiesewetter and W. Kaminsky, *Chem. Eur. J.*, 2003, **9**, 1750-1758.
2. A. L. McKnight and R. M. Waymouth, *Macromolecules*, 1999, **32**, 2816-2825.
3. (a) M. Fineman and S. D. Ross, *J. Polym. Sci.*, 1950, **5**, 259-265; (b) M. P. Stevens, *Polymer Chemistry: An Introduction*, 3rd Edition, Oxford University Press, New York, 1999, p194.
